# Supplementary material for: The Wolbachia cytoplasmic incompatibility enzyme CidB targets nuclear import and protamine-histone exchange factors
Source: eLife. 2019 Nov 27;8:e50026. doi: 10.7554/eLife.50026 (PMC6881146; doi:10.7554/eLife.50026)
Supplement: Supplementary file 1. — a. Plasmids recovered from iterations of a CidB high copy suppression screen. b. CidB* interactome raw data c. Raw data for biological triplicate CidB* enriched hits d. CidB* + CidA interactome raw data e. Raw data for biological triplicate CidB* + CidA enriched hits f. CidA interactome raw data g. Raw data for biological triplicate CidA enriched hits h. Fly Crossing Hatch-Rate Data i. PCR primer database j. Construct database. [file elife-50026-supp1.xlsx]

## Sheet: a
File 1a: Plasmids recovered from iterations of a CidB high copy suppression screen. Methods: To recover all possible suppressors, iterations of the screen were performed using varying selections including temperatures 37, 36.5, 33, 34, and 33 (°C). After co-transformations, colonies were either plated on selective synthetic defined (SD) galactose agar; or replica plated from non-selective SD gluc…
													Selection Method
		Replicates	Plasmid	Genes on the Plasmid									Gal	*Glu to Gal	°C	Clone #	False (+)
		16	YGPM25o01	[GEA2]&	URA3	YEL020C-B	TIM9	RPR1	YEL020C	NSE2	YEL018C-A	EAF5	X	X	37; 36.5; 33	42, 43, T65, T66, T68, T69, T71, T72, T73, T74, T75, T76, J2, J3, K2, K3
		5	YGPM26g16	[YNL193W]&	CHS1	YNL191W	YNL190W	SRP1	[KAR1]*				X		34; 33	10, K4, K5, K6, K7
		3	YGPM27n02	[YDR034C-D]*	YDR034C-C	tL(UAA)D	YDR034C-A	tQ(UUG)D1	YDR034W-B	ARO3	EHD3	[KRS1]*		X	37	T36, T37, T40	X
		3	YGPM3j23	[UBP1]&	YDL121C	YFH1	YDL119C	YDL118W	CYK3	NUP84	IWR1	YDL114W-A		X	37	T41, T42, T44	X
		3	YGPM12h13	[NSE3]&	RTT103	YDR290W	YDR291W	SRP101	[SSD1]&					X	37	T53, T54, T59
		3	?	[RPS13]	YDR065W	YDR066C	YDR067C	DOS2	DOA4	FMP16	PAA1	[IPT1]		X	37	T117, T118, T120
		3	YGPM32e11	[MDH2]*	YOL125W	YOL124C	HRP1	SMF1	[RPS19A]&				X	X	37; 33	T189, K8, K9
		3	YGPM14b23	[PUS1]*	NIP7	SRP72	IPL1	YPL208W	YPL207W	[YPL206C]				X	37	T212, T213, T215	X
		3	YGPM3e23	[YPR117W]&	YPR118W	tK(UUU)P	CLB2	[CLB5]&						X	37	T219, 9z, 15z	X
		3	YGPM32b05	FET4										X	37	T173, T179, 13z
		2	YGPM6f24	[RPL27B]&	snR13	TRS31	PRP3	JIP4	[YDR476C]&				X	X	37	3, T57
		2	YGPM31f02	[KIN1]&	INO2	YDR124W	ECM18	SWF1	[ARO1]*					X	37	29, T35
		2	YGPM5d16	[YML002W]&	YPT7	CDC5	YMR001C-A	YMR002W	YMR003W	[MVP1]*				X	37	52, 121z
		2	YGPM17p15	[KIC1]	SBE22	GRE3	YPT35	[TRR2]*						X	37	48, 49
		2	YGPM20d06	[tY(GUA)M1]	YML053C	SUR7	GAL80	YML050W	RSE1	GSF2	YML047W-A	[PRM6]	X		37	8, 9
		2	YGPM4e13	[ADE8]	[SIZ1]*									X	37	T52, 4z
		2	?	[Skp1]	Pex3									X	37	T159, T163
		2	YGPM23h10	[COS12]&	YGL262W	YGL261C	YGL260W	YPS5	YGL258W-A	YGL258W	[MNT2]&			X	37	T83, T84
		2	YGPM33p24	[HSF1]&	YGL072C	RCS1	RPB9	SRF3	MNP1	NPY1	SGF73	[ALG2]&		X	37	T86, 87
		2	YGPM5f19	[ADE3]&	YGR204C-A	YGR205W	YGR206W	YGR207C	SER2	TRX2	YGR210C	ZPR1		X	37	T97, 98	X
		2	YGPM19f05	[BNA1]*	YJR026W	YJR027W	YJR029W	YJR028W	[YJR030C]&					X	37	T119, T162
		2	YGPM21o17	[PXA2]*	YKL187C									X	37	T134, T136
		2	YGPM30m02	[PUS4]&	MID1	RFC3	PCL1	snR40	CAF40	[SEC21]*				X	37	T183, 131z
		2	YGPM11h18	[YRF1-7]*	YPL282C	[ERR2]								X	37	T70, 17z
		1	YGPM15g10	[GBP2]*	SGF29	ILV6	STP22	YCL007C	VMA9	snR43	YCL005W	PGS1	X		37	1
		1	YGPM1g06	[GPI17]&	PPM1	PPZ2	YDR437W	YDR438W	LRS4	[DOT1]*			X		37	2
		1	YGPM32e04	HXT6	YDR344C	HXT3	[SVF1]&						X		37	5
		1	YGPM21f02	[DPP1]*	ZIP1	YDR286C	YDR287W	NSE3	RTT103	YDR290W	[YDR291W]*		X		37	6
		1	YGPM21p13	[YLR049C]*	YLR050C	YLR051C	IES3	YLR053C	OSW2	SPT8	ERG3	[YLR057W]*	X		34	7
		1	YGPM4g19	[YDL057W]&	MBP1	PSA1	tK(UUU)D	MCH1	PBP4	SLC1	[LHP1]*	[YDL050C]&		X	37	28
		1	YGPM31h21	[SWF1]&	[ARO1]	[YDR128W]*								X	37	32
		1	?	MSS11	[SMP2]*									X	37	34
		1	YGPM14d20	[BFR2]&	PRO1	CFT1	GPI11	[RSC3]&						X	37	38
		1	YGPM27e10	[RPO41]&	MOB2	RPL22B	YFL034W	[RIM15]&						X	37	44
		1	YGPM32k07	[DUO1]*	YBP2	YGL059W	RAD6	YGL057C	SDS23					X	37	45
		1	YGPM20i05	[PRP8]*	YHR165W-A	CDC23	THP2	MTG2	DBP8	[NMD3]*				X	37	47
		1	YGPM30g08	[YLR283W]&	ECI1	NNT1	YLR285C-A	CTS1	YLR286W-A	YLR287C	RPS30A	[MEC3]&		X	37	51
		1	YGPM3j14	[YOR376W]&	YOR376W-A	ATF1	YOR378W	YOR379C	RDR1	FRE3	YOR381W-A			X	37	53
		1	YGPM19l07	tP(UGG)O3	YOR345C	REV1	PYK2	PUT4	[CIN1]*					X	37	54
		1	?		[SCM3]	[RGT2]								X	37	55
		1	YGPM9o24	[RPS17A]	NSE5	APT1	UNG1	YML020W	OST6	[YML018C]&				X	37	57
		1	YGPM30i12	[QCR2]&	AQY1	HPA2	OPT2	YPR195C						X	37	58
		1	YGPM25h19	[ACH1]	tI(AAU)B	tG(GCC)B	RRN6	FMT1	[YBL012C]	[SCT1]*				X	37	T7
		1	YGPM24d14	GDH3	[YAL061W]*									X	37	T10
		1	YGPM29o03	[YCL002C]*	[RER1]	YCL001W-A	YCL001W-B	YCR001W	CDC10	MRPL32	YCP4	[CIT2]&		X	37	T22
		1	YGPM30a19	[PPS1]*	YBR277C	[DPB3]	PAF1	YBR280C	YBR281C	MRPL27	SSH1	[YBR284W]*		X	37	T23
		1	YGPM4h04	[MEC1]	YBR137W	[YBR138C]&								X	37	T25
		1	YGPM19n01	[COP1]*	YDL144C	CCT4	CRD1	BPL1	[RPO21]&					X	37	T33
		1	YGPM7f19	[ARO1]&	YDR128W	SAC6	FIN1	[YDR131C]&						X	37	T34
		1	YGPM18d16	HSP42	SUP35	ARG82	HMO1	RSM24	NGG1	UBC1				X	37	T38	X
		1	YGPM8n15	[CSN9]*	[YDR179W-A]	SCC2	SAS4	CDC1	YDR182W-A	[PLP1]*				X	37	T39
		1	YGPM14g08	[DIA3]*	YDL022C-A	tA(AGC)D	SRF4	GPD1	GPM2	RPN4	[OSH2]&			X	37	T43	X
		1	YGPM23l14	[APC4]&	YDR118W-A	YDR119W	TRM1	DPB4	KIN1	[INO2]				X	37	T19
		1	YGPM14f05	[LCD1]&	RPL37B	PLM2	SAM2	LPP1	SPG3	PSP1	[YDR506C]&			X	37	T49
		1	YGPM8j03	[YDR198C]*	[YDR199W]	VPS64	SPC19	RAV2	YDR203W	COQ4	MSC2	EBS1		X	37	T50
		1	YGPM17e01	[SEC26]*	YDR239C	SNU56	BUD26	tY(GUA)D	AMD2	[PRP28]&				X	37	T56
		1	YGPM14l17	[ABC1]	tW(CCA)G1	YGL118C	YGL117W	CDC20	SNF4	YGL114W	[SLD3]*			X	37	T81
		1	YGPM25b01	[YFR038W]&	YFR039C	SAP155	ERJ5	YFR042W	[YFR043C]	[YFR044C]&				X	37	T82	X
		1	YGPM31i15;	[SAM35]&	STE12	IPI1	NAM8	YHR086W-A	YHR087W	RPF1	GAR1	[YNG2]&		X	37	T88
		1	YGPM20f21	[SFB3]*	[TRA1]*									X	37	T96
		1	YGPM13o20	[ARN2]*	YHL046W-A	YHL046C	YHL045W	YHL044W	ECM34	YHL042W	YHL041W	[ARN1]&		X	37	T99
		1	YGPM5j17	[VPS74]*	FRQ1	YDR374C	BCS1	ARH1	ATP17	LSM6	[RGA2]*			X	37	T109
		1	YGPM17d20	[CYC1]	UTR1	ISY1	OSM1	tG(GCC)J2	RAD7	BFA1	[YJR054W]*			X	37	T111
		1	YGPM31d21	YJR151W-A	DAL5	PGU1	[YJR154W]*							X	37	T112
		1	YGPM1e22	[NMD5]&	XPT1	SGM1	MCM22	TIM8	YJR136C	[ECM17]&				X	37	T113
		1	YGPM5h18	[PRE3]&	AVT1	MPP10	YJR003C	SAG1	[APL1]					X	37	T114, 91z
		1	YGPM7b15	[snR3]&	YJR129C	STR2	MNS1	[NMD5]*						X	37	T115
		1	YGPM18d01	[MEF2]&	tR(ACG)J	GSH1	LSB6	CHS6	[SAP185]*					X	37	T116
		1	YGPM18l14	[YKL027W]&	GPX1	PAN3	URA6	YKL023W	CDC16	[MAK11]&				X	37	T125
		1	YGPM25b18	[COY1]*	STE3	YKL177W	LST4	ZRT3	[YKL174C]	[SNU114]*				X	37	T126
		1	YGPM20j12	YMR090W	NPL6	AIP1	UTP15	CTF13	SNO1	SNZ1	[MTG1]	[YMR098C]&		X	37	T157
		1	YGPM14f11	[CEP3]*	ALD3	ALD2	YMR171C	HOT1	YMR172C-A	DDR48	YMR173W-A	[PAI3]		X	37	T175	X
		1	YGPM13b19	[IPI3]*	YNL181W	RHO5	SRF6	RPS3	MRPL22	YNL176C	[NOP13]&			X	37	T176
		1	YGPM2g20	[YNR071C]*	[HXT17]*									X	37	T190
		1	YGPM6a06	[TCB2]&	YNL086W	MKT1	END3	[SAL1]*						X	37	T192
		1	YGPM2d06	[YOL160W]	YOL159C-A	YOL159C	ENB1	[YOL157C]&						X	37	T194	X
		1	YGPM17p10	NDJ1	YOL103W-B	YOL103W-A	ITR2	[TPT1]&						X	37	T195	X
		1	YGPM5o20	[YOR166C]*	RPS28A	GLN4	YOR169C	YOR170W	LCB4	YRM1	DCS2	[MED4]*		X	37	T202
		1	YGPM25n08	[TIR2]*	AUS1	tT(AGU)O2	YOR011W-A	YOR012W	YOR013W	[RTS1]*				X	37	T203
		1	YGPM14e13	[YOR192C-B]*	YOR192C-A	tM(CAU)O1	PEX27	TOA1	[SLK19]*					X	37	T204
		1	YGPM16f14	YOR387C	FDH1	YOR389W	YOR390W	HSP33	YOR392W	[ERR1]*				X	37	T205
		1	YGPM3p07	[SKI7]*	RTS2	BUD21	ATX2	DIA2	STC2	YOR082C	WHI5	YOR084W		X	37	T206	X
		1	YGPM20h07	YOR318C	HSH49	GNT1	PMT3	[YOR322C]&						X	37	T208
		1	YGPM15l20	[RAD53]*	YPL152W-A	RRD2	PRP46	YPL150W	ATG5	PPT2	[PXA1]*			X	37	T214	X
		1	YGPM32k08	[YOR389W]&	YOR390W	HSP33	YOR392W	ERR1	YOR394W	YOR394C-A	[YOR396W]*			X	37	T229
		1	YGPM16i23	YPR157W	YPR158W	YPR158W-A	[YPR158W-B]							X	37	T236
		1	YGPM32d01	YBR085C-A	IST2	[RFC5]*								X	37	1Z
		1	?	SSE1										X	37	2Z
		1	YGPM10d24	[MAK21]&	YDR061W	LCB2	YDR063W	RPS13	YDR065W	YDR066C	[YDR067C]&			X	37	3Z
		1	YGPM2m18	[ESP1]*	TEL2	[MDR1]*								X	37	7z
		1	YGPM16i22	[INP51]*	YIL001W	SGN1	MPH1	YIR003W	[DJP1]					X	37	8z
		1	YGPM6n10	[YKL033W-A]	FMP47	tV(AAC)K2	IXR1	YKL031W	[YKL030W]*	[MAE1]&				X	37	10z
		1	YGPM29d19	[RIC1]*	YLR040C	YLR041W	YLR042C	TRX1	PDC1	STU2	YLR046C	[YLR047C]&		X	37	11z
		1	YGPM32n15	[YLR422W]&	ATG17	SPP382	tN(GUU)L							X	37	12z
		1	YGPM17m17	[YPL279C]	YPL278C	YPL277C	YPL276W	YPL275W	[SAM3]*					X	37	16z
		1	YGPM14o04	[RIF1]*	PPS1	YBR277C	DPB3	PAF1	[YBR280C]&					X	37	21z
		1	YGPM27m17	[RPT2]&	PTC1	MED2	ATP16	MCD1	[NHP10]&					X	37	31z
		1	YGPM12h21	[YCG1]&	YDR326C	YDR327W	SKP1	PEX3	UBX5	[GPI8]*				X	37	41z
		1	YGPM17b12	[YEL007W]&	YEL006W	VAB2	YEA4	GIM4	WBP1	YEL001C	[MNN1]*			X	37	51z
		1	YGPM3j20	[SER33]*	SPO22	HOP1	YIL071W-A	PCI8	MAM33	RPS24B	YIL068W-A	SEC6		X	37	71z
		1	YGPM13n23	[SSL2]*	YIL142C-A	CCT2	YIL141W	AXL2	REV7	TPM2	YIL137C	OM45		X	37	81z
		1	YGPM8g21	[UBI4]*	ENT4	YLL037W	PRP19	GRC3	RIX7	YLL033W	[YLL032C]&			X	37	101z
		1	YGPM19g06	YLR307C-A	CDA2	IMH1	CDC25	[YLR311C]						X	37	111z
		1	YGPM15c20	[INP54]*	MET22	HUS1	APM4	PRS5	[MAM3]&					X	37	141z
		1	YGPM7m21	[YOR142W-B]&	THI80	[ELG1]&								X	37	151z

## Sheet: b
File 1b: Compiled CidB* interactome data (RAW DATA). Data Analysis: 1. Input scaffold data. 2. Rank by biological replicates of enrichment. 3. Rank by avg-Frequency-score (F-score). 169 total enriched proteins with at least 2 biological replicates; 54 with 3 biological replicates Red boxes indicate where a technical replicate was inconsistent ie. zero pepetides in one technical replicate but >= 1…
											5.17.17							6.28.17							7.27.17
												CidB*(C1025A)			BL21-AI				CidB*(C1025A)			BL21-AI				CidB*(C1025A)			BL21-AI
												Peptide Spectra			Peptide Spectra				Peptide Spectra			Peptide Spectra				Peptide Spectra			Peptide Spectra
		Inconsistency	Replicates	Yeast Ortholog	Drosophila Name	Drosophila Proteins Unique to CidB* and not in BL21-AI negative Control	Accession Number	Molecular Weight	Avg F-Score	STD.s	F-Score	JFB 013.1	JFB 013.2	SUM	JFB 14.1	JFB 014.2	SUM	F-Score	JFB 016.1	JFB 016.2	SUM	JFB 015.1	JFB 015.2	SUM	F-Score	JFB 018.1	JFB 018.2	SUM	JFB 017.1	JFB 017.2	SUM
			3	Srp1	KapA2	Importin subunit alpha OS=Drosophila melanogaster GN=Pen PE=1 SV=2	IMA_DROME	58 kDa	1	0	1	4	9	13			0	1	26	21	47			0	1	7	5	12	0		0
		x	3	PWP2	CG14722	Cluster of WD repeat-containing protein 55 homolog OS=Drosophila melanogaster GN=CG14722 PE=2 SV=1 (WDR55_DROME)	WDR55_DROME	55 kDa	1	0	1	1	2	3			0	1	4	0	4			0	1	26	35	61			0
		x	3	Lhp1	La	La protein homolog OS=Drosophila melanogaster GN=La PE=1 SV=2	LA_DROME	45 kDa	0.958333	0.0721688	1	19	0	19			0	0.875	8	0	8		1	1	1	41	37	78			0
		x	3	Noc2	CG9246	Nucleolar complex protein 2 homolog OS=Drosophila melanogaster GN=CG9246 PE=1 SV=1	NOC2L_DROME	87 kDa	0.876543	0.213833	1	3	0	3			0	1	4	3	7			0	0.62963	25	29	54	12	8	20
		x	3	PTC1-4	CG10417	Uncharacterized protein, isoform B OS=Drosophila melanogaster GN=CG10417 PE=1 SV=1	E2QC56_DROME	72 kDa	0.854545	0.251935	1	0	4	4			0	1	2	3	5			0	0.563636	56	54	110	25	23	48
			3	NMD5; SXM1; CSE1	Importin 7	D-Importin 7/RanBP7 OS=Drosophila melanogaster GN=msk PE=1 SV=1	Q9VSD6_DROME	119 kDa	0.84846	0.131252	0.774648	30	41	71	7	9	16	1	8	9	17			0	0.770732	107	98	205	27	20	47
			3	hsh49	Modulo	Modulo, isoform C OS=Drosophila melanogaster GN=mod PE=1 SV=1	A0A0B4K7G4_DROME	60 kDa	0.834525	0.15306	0.805556	35	37	72	7	7	14	1	7	7	14			0	0.69802	99	103	202	34	27	61
			3	DOM34	Pelota	Protein pelota OS=Drosophila melanogaster GN=pelo PE=2 SV=2	PELO_DROME	44 kDa	0.809524	0.329914	1	2	1	3	0		0	0.428571	4	3	7	3	1	4	1	14	13	27			0
			3	HRR25; YCK1; YCK2;	Gilgamesh	Gilgamesh, isoform L OS=Drosophila melanogaster GN=gish PE=1 SV=1*isoform J and L combined	A0A0B4KHL4_DROME	60 kDa	0.761905	0.412393	1	3	1	4			0	0.285714	5	2	7	4	1	5	1	6	6	12			0
			3	NA	P32*protamine removal chaperone	CG6459 protein OS=Drosophila melanogaster GN=P32 PE=1 SV=1	Q7JXC4_DROME	29 kDa	0.76065	0.154922	0.805556	16	20	36	4	3	7	0.588235	8	9	17	4	3	7	0.888158	80	72	152	6	11	17
		x	3	NA	eIF-3p40	Eukaryotic translation initiation factor 3 subunit H OS=Drosophila melanogaster GN=eIF-3p40 PE=1 SV=2	EIF3H_DROME	38 kDa	0.730159	0.467379	1	21	0	21			0	0.190476	29	34	63	21	30	51	1	90	73	163			0
			3	TIF5	eIF5	Eukaryotic translation initiation factor 5 OS=Drosophila melanogaster GN=eIF5 PE=1 SV=1	IF5_DROME	52 kDa	0.723676	0.242166	0.622642	25	28	53	12	8	20	1	16	14	30			0	0.548387	81	74	155	36	34	70
			3	SAH1	AhcyL1	Adenosylhomocysteinase OS=Drosophila melanogaster GN=AhcyL1 PE=1 SV=1	Q9VZX9_DROME	57 kDa	0.706489	0.410725	0.882353	7	10	17	1	1	2	1	4	3	7			0	0.237113	48	49	97	39	35	74
			3	CBF5	Nop60B	Nucleolar protein at 60B, isoform C OS=Drosophila melanogaster GN=Nop60B PE=1 SV=1	E1JGV6_DROME	57 kDa	0.689704	0.363254	0.959184	25	24	49	1	1	2	0.833333	5	1	6	1		1	0.276596	48	46	94	36	32	68
			3	INP52	Synj	GH06496p OS=Drosophila melanogaster GN=Synj PE=1 SV=1	Q5U0V7_DROME	135 kDa	0.642963	0.377688	0.7	3	7	10	1	2	3	0.24	12	13	25	10	9	19	0.988889	45	45	90	1	0	1
			3	NA	Dek	Dek, isoform C OS=Drosophila melanogaster GN=Dek PE=1 SV=1	A1ZAK3_DROME	72 kDa	0.641807	0.447838	0.785714	7	7	14	1	2	3	1	5	4	9			0	0.139706	72	64	136	63	54	117
		x	3	SRP68	SRP68	Signal recognition particle subunit SRP68 OS=Drosophila melanogaster GN=Srp68 PE=2 SV=1	SRP68_DROME	69 kDa	0.63456	0.468509	1	24	0	24			0	0.797297	39	35	74	9	6	15	0.106383	68	73	141	65	61	126
			3	NA	Mapmodulin	Mapmodulin, isoform B OS=Drosophila melanogaster GN=Mapmodulin PE=1 SV=1	B7YZR7_DROME	29 kDa	0.625522	0.385697	0.647059	8	9	17	2	4	6	1	10	6	16			0	0.229508	31	30	61	23	24	47
			3	NA	Vitellogenin-1	Vitellogenin-1 OS=Drosophila melanogaster GN=Yp1 PE=1 SV=1	VIT1_DROME	49 kDa	0.602334	0.500543	0.885886	158	175	333	18	20	38	0.0243902	21	20	41	23	17	40	0.896725	193	204	397	22	19	41
			3	NA	Ude	Uracil-DNA degrading factor, isoform B OS=Drosophila melanogaster GN=Ude PE=1 SV=1	Q7KS11_DROME	36 kDa	0.598371	0.388859	0.571429	7	7	14	2	4	6	1	6	3	9			0	0.223684	37	39	76	30	29	59
			3	UBC8; UBC5; UBC11	UbcE2H	CG2257 OS=Drosophila melanogaster GN=UbcE2H PE=1 SV=1	Q7JW03_DROME	21 kDa	0.591156	0.354953	0.411765	9	8	17	5	5	10	1	7	8	15			0	0.361702	22	25	47	15	15	30
			3	H2B Nucleosome	H2B	Histone H2B OS=Drosophila melanogaster GN=His2B PE=1 SV=2	H2B_DROME	14 kDa	0.583951	0.283553	0.5	4	6	10	2	3	5	0.9	4	6	10		1	1	0.351852	27	27	54	17	18	35
			3	SPS1; KIC1; STE20	GckIII	FI20177p1 OS=Drosophila melanogaster GN=GckIII PE=1 SV=1	Q9VEN3_DROME	70 kDa	0.56114	0.400876	0.111111	3	6	9	5	3	8	0.692308	20	19	39	8	4	12	0.88	27	23	50	3	3	6
		x	3	eIF3 p33	eIF3ga	Eukaryotic translation initiation factor 3 subunit G-A OS=Drosophila melanogaster GN=eIF3ga PE=1 SV=1	EI3GA_DROME	30 kDa	0.556689	0.383922	1	8	0	8			0	0.333333	6	6	12	3	5	8	0.336735	52	46	98	33	32	65
			3	sto1p	Cbp80	Cap binding protein 80, isoform B OS=Drosophila melanogaster GN=Cbp80 PE=1 SV=1	E2QD75_DROME	93 kDa	0.550843	0.139263	0.642857	5	9	14	3	2	5	0.619048	21	21	42	7	9	16	0.390625	34	30	64	20	19	39
			3	NA	Arouser	Arouser, isoform A OS=Drosophila melanogaster GN=aru PE=1 SV=1	Q8IPW1_DROME	88 kDa	0.540064	0.398323	0.307692	7	6	13	3	6	9	0.3125	17	15	32	12	10	22	1	9	10	19			0
			3	NA	Vitellogenin-2	Vitellogenin-2 OS=Drosophila melanogaster GN=Yp2 PE=1 SV=2	VIT2_DROME	50 kDa	0.53942	0.240191	0.763314	77	92	169	20	20	40	0.285714	23	26	49	17	18	35	0.569231	66	64	130	32	24	56
		x	3	NA	eIF3L	Eukaryotic translation initiation factor 3 subunit L OS=Drosophila melanogaster GN=CG5642 PE=2 SV=1	EIF3L_DROME	63 kDa	0.535897	0.401943	1	16	0	16			0	0.3	21	19	40	14	14	28	0.307692	63	67	130	46	44	90
			3	SMD2	SmD2	Probable small nuclear ribonucleoprotein Sm D2 OS=Drosophila melanogaster GN=SmD2 PE=1 SV=1	SMD2_DROME	14 kDa	0.507168	0.156038	0.5	7	7	14	4	3	7	0.666667	3	6	9	1	2	3	0.354839	16	15	31	10	10	20
			3	NA	CG7488	CG7488 OS=Drosophila melanogaster GN=CG7488 PE=2 SV=2	Q9VG07_DROME	42 kDa	0.497024	0.326392	0.142857	2	5	7	4	2	6	0.785714	7	7	14	2	1	3	0.5625	7	9	16	3	4	7
			3	UFD4	ctrip	Circadian trip, isoform E OS=Drosophila melanogaster GN=ctrip PE=1 SV=1	A0A0B4JCV6_DROME	314 kDa	0.490741	0.347315	0.25	1	3	4	1	2	3	0.888889	10	8	18	1	1	2	0.333333	28	35	63	21	21	42
			3	Uaf30	Non2	LD45195p OS=Drosophila melanogaster GN=Non2 PE=1 SV=1	Q9VZY0_DROME	27 kDa	0.484583	0.462634	0.105263	10	9	19	8	9	17	1	8	9	17			0	0.348485	32	34	66	21	22	43
			3	NA	mRpL37	LD25118p OS=Drosophila melanogaster GN=mRpL37 PE=1 SV=3	Q9VGW9_DROME	46 kDa	0.483333	0.125831	0.6	4	1	5		2	2	0.5	4	4	8	2	2	4	0.35	20	20	40	14	12	26
			3	NA	Cdep	Cluster of Chondrocyte-derived ezrin-like domain containing protein ortholog, isoform F OS=Drosophila melanogaster GN=Cdep PE=1 SV=1 (A0A0C4DHA1_DROME)	A0A0C4DHA1_DROME	132 kDa	0.475355	0.190482	0.285714	6	8	14	7	3	10	0.473684	20	18	38	13	7	20	0.666667	15	15	30	4	6	10
			3	NA	mRpS22	GH07821p OS=Drosophila melanogaster GN=mRpS22 PE=1 SV=1	Q9VAY9_DROME	46 kDa	0.469737	0.301505	0.684211	9	10	19	2	4	6	0.6	4	1	5	1	1	2	0.125	28	28	56	27	22	49
			3	NA	l(3)72Ab	Putative U5 small nuclear ribonucleoprotein 200 kDa helicase OS=Drosophila melanogaster GN=l(3)72Ab PE=2 SV=4	U520_DROME	245 kDa	0.465548	0.327235	0.5	3	9	12	3	3	6	0.122449	27	22	49	23	20	43	0.774194	60	64	124	17	11	28
			3	NA	yps	Ypsilon schachtel, isoform B OS=Drosophila melanogaster GN=yps PE=1 SV=1	M9NFR5_DROME	37 kDa	0.464286	0.305143	0.142857	3	4	7	4	2	6	0.75	6	2	8	1	1	2	0.5	13	13	26	9	4	13
			3	BMH2	14-3-3zeta	14-3-3zeta, isoform K OS=Drosophila melanogaster GN=14-3-3zeta PE=1 SV=1	A0A0B4KEH0_DROME	28 kDa	0.452652	0.175708	0.545455	5	6	11	3	2	5	0.25	6	6	12	4	5	9	0.5625	8	8	16	3	4	7
			3	ubiquitin	Ubiquitin	Cluster of Ubiquitin-40S ribosomal protein S27a OS=Drosophila melanogaster GN=RpS27A PE=1 SV=2 (RS27A_DROME)	RS27A_DROME	18 kDa	0.435339	0.331575	0.636364	8	3	11	4		4	0.0526316	10	9	19	10	8	18	0.617021	23	24	47	10	8	18
			3	NA	CG6153	CG6153, isoform C OS=Drosophila melanogaster GN=CG6153 PE=4 SV=2	E1JHG8_DROME	24 kDa	0.40473	0.217944	0.4	6	9	15	5	4	9	0.189189	19	18	37	17	13	30	0.625	8	8	16	2	4	6
			3	NA	bsf	Bicoid stability factor OS=Drosophila melanogaster GN=bsf PE=1 SV=2	Q9VJ86_DROME	157 kDa	0.400673	0.493311	0.0503597	68	71	139	69	63	132	0.964824	104	95	199	5	2	7	0.186837	237	234	471	193	190	383
			3	Ade4	Prat2	Amidophosphoribosyltransferase OS=Drosophila melanogaster GN=Prat2 PE=2 SV=1	Q967S0_DROME	59 kDa	0.370263	0.331142	0.727273	5	6	11	1	2	3	0.0731707	20	21	41	21	17	38	0.310345	12	17	29	11	9	20
			3	RPP0	RpLP0	60S acidic ribosomal protein P0 OS=Drosophila melanogaster GN=RpLP0 PE=3 SV=1	M9PG76_DROME (+1)	34 kDa	0.369083	0.102747	0.483871	18	13	31	8	8	16	0.285714	7	7	14	6	4	10	0.337662	39	38	77	26	25	51
			3	MSW1	TrpRS-m	FI03887p OS=Drosophila melanogaster GN=TrpRS-m PE=1 SV=1	Q9VVL8_DROME	73 kDa	0.35101	0.131725	0.25	11	17	28	13	8	21	0.30303	31	35	66	25	21	46	0.5	14	14	28	8	6	14
			3	HSP90	Hsp83	Heat shock protein 83, isoform B OS=Drosophila melanogaster GN=Hsp83 PE=3 SV=1	M9PBL3_DROME	82 kDa	0.270833	0.157288	0.25	3	5	8	4	2	6	0.125	19	13	32	16	12	28	0.4375	33	31	64	21	15	36
			3	NA	mRpS10	Isoform A of 28S ribosomal protein S10, mitochondrial OS=Drosophila melanogaster GN=mRpS10	RT10_DROME	19 kDa	0.258041	0.11555	0.125	5	3	8	4	3	7	0.333333	1	5	6	2	2	4	0.315789	9	10	19	6	7	13
			3	MNP1	mRpL12	GM03767p OS=Drosophila melanogaster GN=mRpL12 PE=1 SV=1	Q9VSR5_DROME	20 kDa	0.222619	0.153876	0.142857	3	4	7	3	3	6	0.125	5	3	8	5	2	7	0.4	16	14	30	5	13	18
			3	Nap1 H2A/B chaperone	Nap1	LD21576p OS=Drosophila melanogaster GN=Nap1 PE=1 SV=1	Q9W1G7_DROME	43 kDa	0.21376	0.0156926	0.222222	16	20	36	14	14	28	0.195652	25	21	46	20	17	37	0.223404	48	46	94	39	34	73
			3	RPS9A	RpS9	LD13662p OS=Drosophila melanogaster GN=RpS9 PE=1 SV=1	C6SUW3_DROME	23 kDa	0.201089	0.126298	0.3	15	15	30	9	12	21	0.0588235	18	16	34	17	15	32	0.244444	22	23	45	15	19	34
			3	RPS2	RpS2	Ribosomal protein S2, isoform B OS=Drosophila melanogaster GN=RpS2 PE=3 SV=1	M9PB84_DROME	29 kDa	0.187222	0.0615231	0.171429	19	16	35	14	15	29	0.135135	16	21	37	16	16	32	0.255102	50	48	98	38	35	73
			3	RPL11B	RpL11	Ribosomal protein L11, isoform B OS=Drosophila melanogaster GN=RpL11 PE=1 SV=1	A0A0B4LGZ5_DROME	21 kDa	0.181763	0.132635	0.125	8	8	16	7	7	14	0.333333	10	14	24	9	7	16	0.0869565	11	12	23	13	8	21
			3	NA	Caix	Caix OS=Drosophila melanogaster GN=caix PE=4 SV=2	Q9VB76_DROME	35 kDa	0.178419	0.136296	0.125	7	9	16	7	7	14	0.333333	12	12	24	10	6	16	0.0769231	8	5	13	7	5	12
			3	RPS26B	RpS26	40S ribosomal protein S26 OS=Drosophila melanogaster GN=RpS26 PE=3 SV=1	M9PG47_DROME	13 kDa	0.142761	0.114727	0.272727	5	6	11	5	3	8	0.1	4	6	10	4	5	9	0.0555556	8	10	18	8	9	17
			2	NA	krasavietz	Protein krasavietz OS=Drosophila melanogaster GN=kra PE=1 SV=1	PKRA_DROME	49 kDa	1		1	25	20	45			0	#DIV/0!							1	35	32	67			0
			2	Pse1; KAP121; KAP95	karyopherin beta	FI07923p OS=Drosophila melanogaster GN=Karybeta3 PE=1 SV=1	Q9VN44_DROME	124 kDa	1		1	18	14	32			0	#DIV/0!							1	21	23	44			0
			2	STE20; KIC1	Frayed	Frayed, isoform A OS=Drosophila melanogaster GN=fray PE=1 SV=1	Q7KSD3_DROME	60 kDa	1		1	6	10	16			0	#DIV/0!							1	6	5	11			0
			2	HSP90	CG16817	Uncharacterized protein, isoform B OS=Drosophila melanogaster GN=CG16817 PE=1 SV=1	A0A0B4K6D2_DROME (+1)	21 kDa	1		1	8	8	16			0	#DIV/0!							1	14	16	30			0
			2	Calnexin	Calreticulin	Calreticulin OS=Drosophila melanogaster GN=Crc PE=1 SV=2	CALR_DROME (+1)	47 kDa	1		1	5	10	15			0	#DIV/0!							1	17	13	30			0
			2	NA	CG17472	GEO08953p1 OS=Drosophila melanogaster GN=CG17472 PE=2 SV=1	Q9VIL5_DROME	19 kDa	1		1	6	6	12			0	#DIV/0!							1	4	5	9			0
			2	FPR1; FPR3; FPR4	FKBP506	39 kDa FK506-binding nuclear protein OS=Drosophila melanogaster GN=FK506-bp1 PE=1 SV=2	FKB39_DROME	39 kDa	1		1	8		8			0	1	12	13	25			0	#DIV/0!			0	84	69	153
			2	HSC82	Gp93	Glycoprotein 93 OS=Drosophila melanogaster GN=Gp93 PE=1 SV=1	Q9VAY2_DROME	90 kDa	1		1	4	4	8			0	#DIV/0!							1	16	21	37			0
			2	SEC13	SEC13	Protein SEC13 homolog OS=Drosophila melanogaster GN=Sec13 PE=1 SV=1	SEC13_DROME	40 kDa	1		1	6		6			0	-1.05		20	20	21	20	41	1	6	5	11		0	0
			2	NA	BCCIP	Protein BCCIP homolog OS=Drosophila melanogaster GN=CG9286 PE=2 SV=2	BCCIP_DROME	33 kDa	1		1	6		6			0	#DIV/0!							1	35	31	66			0
			2	NA	CSN7	COP9 signalosome complex subunit 7 OS=Drosophila melanogaster GN=CSN7 PE=1 SV=2	CSN7_DROME	31 kDa	1		1	2	4	6			0	#DIV/0!							1	13	13	26			0
			2	NA	CG10126	GH08978p OS=Drosophila melanogaster GN=CG10126-RB PE=1 SV=2	Q86PF4_DROME (+1)	26 kDa	1		1	3	3	6			0	#DIV/0!							1	4	8	12			0
			2	NA	CG17041	Cluster of IP18102p OS=Drosophila melanogaster GN=CG17041 PE=2 SV=1 (A2RVI0_DROME)	A2RVI0_DROME [2]	28 kDa	1		1	1	4	5			0	#DIV/0!							1	5	8	13			0
			2	CNB1	CG31650	Uncharacterized protein, isoform G OS=Drosophila melanogaster GN=CG31650 PE=1 SV=1	M9PC74_DROME (+1)	39 kDa	1		1	2	2	4			0	#DIV/0!							1	9	6	15			0
			2	KAP114 *imports Nap1, H2A/B; similar to Cse1; KAP120	Ranbp9	LP08082p OS=Drosophila melanogaster GN=Ranbp9 PE=1 SV=1	Q9VGP4_DROME	114 kDa	1		1	2	2	4			0	#DIV/0!							1	2	4	6			0
			2	NA	Pdcd4	LD21074p OS=Drosophila melanogaster GN=Pdcd4 PE=1 SV=2	Q9VY91_DROME	56 kDa	1		1	1	3	4			0	#DIV/0!							1	11	9	20			0
			2	RRD1; RRD2	Ptpa	Serine/threonine-protein phosphatase 2A activator OS=Drosophila melanogaster GN=Ptpa PE=1 SV=1	Q9VQQ0_DROME	44 kDa	1		1	0	4	4			0	#DIV/0!							1	6	8	14			0
			2	Aos1	Aos1	Activator of SUMO 1 OS=Drosophila melanogaster GN=Aos1 PE=1 SV=1	Q7KSM5_DROME	38 kDa	1		1	2	1	3			0	#DIV/0!							1	14	10	24			0
			2	BCY1	Pka-R2	KAPR2_DROME cAMP-dependent protein kinase type II regulatory subunit OS=Drosophila melanogaster GN=Pka-R2 PE=1 SV=2	sp|P81900|KAPR2_DROMEcAMP-dependent protein kinase type II regulatory subunit OS=Drosophila melanogaster GN=Pka-R2 PE=1 SV=2	?	1		#DIV/0!	0	0	0	0	0	0	1	8		8			0	1	2	5	7			0
			2	NA	RanGAP* Segregation Distorter	Ran GTPase activating protein, isoform B OS=Drosophila melanogaster GN=RanGAP PE=1 SV=1	M9PBD9_DROME (+2)	66 kDa	0.990566		1	6	8	14	0		0	#DIV/0!							0.981132	25	28	53	0	1	1
			2	Boi2	Amph	Amphiphysin, isoform B OS=Drosophila melanogaster GN=Amph PE=1 SV=1	A0A0B4KEW6_DROME (+2)	55 kDa	0.986111		0.972222	19	17	36		1	1	-0.3125	7	9	16	11	10	21	1	14	17	31			0
			2	tif11	eIF1A	Eukaryotic initiation factor 1A, isoform A OS=Drosophila melanogaster GN=eIF1A PE=1 SV=1*isoform C and B combined	Q9VEA1_DROME	17 kDa	0.983871		1	7	6	13			0	#DIV/0!							0.967742	15	16	31	1		1
			2	NA	CG9297	CG9297, isoform B OS=Drosophila melanogaster GN=CG9297 PE=1 SV=1	Q8I0D4_DROME (+1)	106 kDa	0.968254		1	3	5	8			0	#DIV/0!							0.936508	31	32	63	3	1	4
			2	EGD2	Nacalpha	Nascent polypeptide associated complex protein alpha subunit, isoform D OS=Drosophila melanogaster GN=Nacalpha PE=4 SV=1	A0A0B4LEY6_DROME (+1)	23 kDa	0.964286		1	5	4	9			0	#DIV/0!							0.928571	6	8	14		1	1
			2	TEF2	eEF1delta	Isoform A of Probable elongation factor 1-delta OS=Drosophila melanogaster GN=eEF1delta	sp|Q9VL18-2|EF1D_DROME (+1)	26 kDa	0.954545		1	13	9	22			0	#DIV/0!							0.909091	23	21	44	2	2	4
			2	calmodulin	TpnC73F	Troponin C at 73F, isoform C OS=Drosophila melanogaster GN=TpnC73F PE=4 SV=1	X2JCI6_DROME (+1)	18 kDa	0.95		1	1	2	3			0	#DIV/0!							0.9	6	4	10	1		1
			2	TUB3	alphaTub67C* this is maternal alpha tubulin	Tubulin alpha-4 chain OS=Drosophila melanogaster GN=alphaTub67C PE=3 SV=1	TBA4_DROME	51 kDa	0.933333		0.866667	8	7	15	1	1	2	-3	3	0	3	4	8	12	1	14	16	30	0	0	0
			2	NA	Cand1	Cullin-associated and neddylation-dissociated 1, isoform B OS=Drosophila melanogaster GN=Cand1 PE=1 SV=1	M9PB90_DROME	139 kDa	0.923077		0.846154	18	21	39	5	1	6	-0.176471	28	23	51	30	30	60	1	18	20	38			0
			2	TEF1	eEF1beta	Elongation factor 1 beta, isoform C OS=Drosophila melanogaster GN=eEF1beta PE=3 SV=1	A0A0B4LFL3_DROME	24 kDa	0.917808		1	14	14	28			0	#DIV/0!							0.835616	36	37	73	7	5	12
			2	NA	chb*chromosome bows	CLIP-associating protein OS=Drosophila melanogaster GN=chb PE=1 SV=1	CLASP_DROME	166 kDa	0.875		1	3		3			0	0.75	8	8	16		4	4	#DIV/0!
			2	STE20; KIC1	Pak	p21-activated kinase, isoform F OS=Drosophila melanogaster GN=Pak PE=4 SV=2	B7Z0W0_DROME (+1)	90 kDa	0.846154		1	3	2	5			0	0.692308	6	7	13	2	2	4	#DIV/0!
			2	NA	Vitellogenin-3	Vitellogenin-3 OS=Drosophila melanogaster GN=Yp3 PE=1 SV=1	VIT3_DROME (+1)	46 kDa	0.81342		0.769697	155	175	330	41	35	76	-0.0326087	42	50	92	50	45	95	0.857143	138	121	259	20	17	37
			2	Nab3; Pub1	B52	B52, isoform O OS=Drosophila melanogaster GN=B52 PE=4 SV=1	A0A0C4DHG5_DROME (+4)	40 kDa	0.8		0.6	7	8	15	3	3	6	1	3	3	6			0	-0.254545	29	26	55	34	35	69
			2	NAT1	NAT1	NAT1, isoform D OS=Drosophila melanogaster GN=NAT1 PE=1 SV=1	A1Z968_DROME	163 kDa	0.795455		0.590909	13	9	22	4	5	9	#DIV/0!							1	18	16	34			0
			2	MSI1*subunit of CAF-1; RRB1	l(2)09851*Nucleosome Assembly chaperon	Lethal (2) 09851, isoform A OS=Drosophila melanogaster GN=l(2)09851 PE=1 SV=1	Q8SYL1_DROME	51 kDa	0.784091		0.75	10	6	16	1	3	4	#DIV/0!							0.818182	33	33	66	5	7	12
			2	CBK1	Tricornered	Cluster of Tricornered, isoform B OS=Drosophila melanogaster GN=trc PE=3 SV=1 (M9PG43_DROME)	M9PG43_DROME	53 kDa	0.770833		0.666667	1	2	3	1		1	0.875	8		8		1	1	#DIV/0!
			2	CKB2	Casein kinase II subunit beta	Casein kinase II subunit beta OS=Drosophila melanogaster GN=CkIIbeta PE=2 SV=2	sp|P08182|CSK2B_DROME	27 kDa	0.77		1	11	12	23			0	-1.54545		11	11	14	14	28	0.54	24	26	50	12	11	23
			2	SMD1	SmD1	Probable small nuclear ribonucleoprotein Sm D1 OS=Drosophila melanogaster GN=SmD1 PE=1 SV=1	SMD1_DROME	14 kDa	0.755376		0.833333	7	5	12	2		2	#DIV/0!							0.677419	17	14	31	6	4	10
			2	MSL5	qkr54B	Quaking related 54B, isoform E OS=Drosophila melanogaster GN=qkr54B PE=1 SV=1	A0A0B4KFT9_DROME	67 kDa	0.75		1	3	2	5	0	0	0	#DIV/0!							0.5	3	3	6	2	1	3
			2	BMH1; BMH2	14-3-3epsilon	Isoform D of 14-3-3 protein epsilon OS=Drosophila melanogaster GN=14-3-3epsilon	sp|P92177-1|1433E_DROME (+3)	30 kDa	0.75		0.75	5	3	8	1	1	2	#DIV/0!							0.75	11	9	20	2	3	5
			2	NA	WASp* interacts with NAP1	WASp, isoform C OS=Drosophila melanogaster GN=WASp PE=4 SV=1	Q86B74_DROME (+1)	54 kDa	0.75		0.5	2	2	4	2		2	#DIV/0!							1	10	8	18			0
			2	Hos4	GLS	Glutaminase, isoform K OS=Drosophila melanogaster GN=GLS PE=1 SV=1	A0A0B4LF95_DROME (+9)	81 kDa	0.722222		0.444444	4	5	9	3	2	5	-0.8	13	7	20	17	19	36	1	10	13	23			0
			2	TUB2	Tubulin beta	Tubulin beta chain OS=Drosophila melanogaster GN=betaTub97EF PE=1 SV=1	Q8MST5_DROME	51 kDa	0.721594		0.62963	41	40	81	15	15	30	-0.217391	47	45	92	56	56	112	0.813559	62	56	118	11	11	22
			2	NA	exu	AT02443p OS=Drosophila melanogaster GN=exu PE=1 SV=1	E1JGN9_DROME	58 kDa	0.718373		0.75	1	3	4	1	0	1	#DIV/0!							0.686747	41	42	83	14	12	26
			2	NOP58; NOP56	nop5	CG10206-PA OS=Drosophila melanogaster GN=nop5 PE=1 SV=2	Q9VM69_DROME	57 kDa	0.703074		0.833333	9	9	18	3	0	3	-0.666667	4	2	6	6	4	10	0.572816	56	47	103	25	19	44
			2	NA	CG10306	Eukaryotic translation initiation factor 3 subunit K OS=Drosophila melanogaster GN=CG10306 PE=2 SV=1	EIF3K_DROME	26 kDa	0.7		1	13		13			0	0.4	20	15	35	13	8	21	-0.716667	60		60	49	54	103
			2	GLN1	Gs2	Glutamine synthetase OS=Drosophila melanogaster GN=Gs2 PE=1 SV=1	X2JDA5_DROME (+3)	42 kDa	0.7		1	4	3	7			0	-0.192308	14	12	26	17	14	31	0.4	4	6	10	3	3	6
			2	NA	stnB	Protein stoned-B OS=Drosophila melanogaster GN=stnB PE=1 SV=4	STNB_DROME (+2)	138 kDa	0.666667		0.333333	5	4	9	2	4	6	-0.25	3	1	4	2	3	5	1	8	8	16			0
			2	Uba1; Prp21	Sf3a1	GH03554p OS=Drosophila melanogaster GN=Sf3a1 PE=1 SV=1	Q9VEP9_DROME	88 kDa	0.666667		0.333333	3	3	6	3	1	4	1	4	3	7			0	-0.1	55	55	110	62	59	121
			2	GAR1	CG4038	Probable H/ACA ribonucleoprotein complex subunit 1 OS=Drosophila melanogaster GN=CG4038 PE=2 SV=1	GAR1_DROME	23 kDa	0.625		1	6	10	16	0		0	#DIV/0!							0.25	15	17	32	12	12	24
			2	KAP95	Importin Beta	Importin subunit beta OS=Drosophila melanogaster GN=Fs(2)Ket PE=2 SV=2	IMB_DROME (+1)	99 kDa	0.625		1	1	3	4			0	0.25	4		4	2	1	3	#DIV/0!
			2	TIF34	Trip1	Eukaryotic translation initiation factor 3 subunit I OS=Drosophila melanogaster GN=Trip1 PE=1 SV=1	EIF3I_DROME	36 kDa	0.623239		1	17		17			0	-0.705882		34	34	31	27	58	0.246479	69	73	142	52	55	107
			2	NA	mRpS34	Mitochondrial ribosomal protein S34 OS=Drosophila melanogaster GN=mRpS34 PE=1 SV=2	Q9VV39_DROME	22 kDa	0.62069		1	3	4	7			0	#DIV/0!							0.241379	13	16	29	12	10	22
			2	NA	Upheld	Cluster of Upheld, isoform O OS=Drosophila melanogaster GN=up PE=1 SV=1 (M9PHR2_DROME)	M9PHR2_DROME	47 kDa	0.617735		0.727273	15	18	33	4	5	9	#DIV/0!							0.508197	28	33	61	15	15	30
			2	NA	Troponin I	Cluster of Troponin I OS=Drosophila melanogaster GN=wupA PE=2 SV=3 (sp|P36188|TNNI_DROME)	sp|P36188|TNNI_DROME [5]	30 kDa	0.608696		1	10	8	18	0	0	0	#DIV/0!							0.217391	25	21	46	19	17	36
			2	MAK11;	CG12608	LD30439p OS=Drosophila melanogaster GN=CG12608 PE=1 SV=2	Q9VXW3_DROME	49 kDa	0.607143		0.214286	7	7	14	8	3	11	1	7	5	12			0	-0.358209	32	35	67	45	46	91
			2	FUN12	eIF5B	FI21437p1 OS=Drosophila melanogaster GN=eIF5B PE=1 SV=2	Q9VZP5_DROME	127 kDa	0.597964		0.607143	13	15	28	6	5	11	#DIV/0!							0.588785	102	112	214	49	39	88
			2	SMB1	SmB	Small nuclear ribonucleoprotein-associated protein B OS=Drosophila melanogaster GN=SmB PE=1 SV=1	RSMB_DROME	21 kDa	0.590278		0.625	4	4	8	2	1	3	#DIV/0!							0.555556	13	14	27	8	4	12
			2	YDJ1	Droj2	DnaJ-like-2, isoform A OS=Drosophila melanogaster GN=Droj2 PE=1 SV=1	Q9VFV9_DROME	45 kDa	0.583333		0.5	2	2	4	0	2	2	-0.166667	6	6	12	8	6	14	0.666667	2	4	6	1	1	2
			2	TUB1	Tubulin alpha-1	Cluster of Tubulin alpha-1 chain OS=Drosophila melanogaster GN=alphaTub84B PE=1 SV=1 (TBA1_DROME)	TBA1_DROME [2]	50 kDa	0.572658		0.451327	53	60	113	33	29	62	-0.2	64	61	125	77	73	150	0.693989	90	93	183	29	27	56
			2	NA	mRpS17	GEO07594p1 OS=Drosophila melanogaster GN=mRpS17 PE=2 SV=1	Q9W199_DROME	18 kDa	0.5625		1	3	3	6			0	#DIV/0!							0.125	10	14	24	11	10	21
			2	HH01	Histone H1	Histone H1 OS=Drosophila melanogaster GN=His1 PE=1 SV=1	H1_DROME (+2)	26 kDa	0.561404		0.333333	2	4	6	2	2	4	-0.0952381	11	10	21	11	12	23	0.789474	10	9	19	2	2	4
			2	PFK1; PFK2	Pfk	Cluster of ATP-dependent 6-phosphofructokinase OS=Drosophila melanogaster GN=Pfk PE=1 SV=1 (A0A0B4K7L1_DROME)	A0A0B4K7L1_DROME	105 kDa	0.560185	0.667759	0.203704	55	53	108	39	47	86	-0.417808	74	72	146	106	101	207	0.916667	6	6	12	1		1
			2	NA	CG4679	Cluster of Protein PTCD3 homolog, mitochondrial OS=Drosophila melanogaster GN=CG4679 PE=2 SV=1 (PTCD3_DROME)	PTCD3_DROME [2]	74 kDa	0.544643		1	7	11	18			0	#DIV/0!							0.0892857	27	29	56	26	25	51
			2	NA	dishevelled	Segment polarity protein dishevelled OS=Drosophila melanogaster GN=dsh PE=1 SV=2	DSH_DROME	69 kDa	0.541667		0.333333	1	2	3	1	1	2	0.75	1	3	4	1	0	1	#DIV/0!
			2	NA	Nph*connected to TAP/p32	GEO09167p1 OS=Drosophila melanogaster GN=Nph PE=1 SV=1	Q9VAC4_DROME	17 kDa	0.533333		0.5	8	8	16	4	4	8	#DIV/0!							0.566667	31	29	60	12	14	26
			2	ISW1	Iswi	Chromatin-remodeling complex ATPase chain Iswi OS=Drosophila melanogaster GN=Iswi PE=1 SV=1	ISWI_DROME	119 kDa	0.522034		0.4	3	2	5	1	2	3	#DIV/0!							0.644068	31	28	59	11	10	21
			2	SUB1	Ssb-c31a*dosage compensation	RNA polymerase II transcriptional coactivator OS=Drosophila melanogaster GN=Ssb-c31a PE=2 SV=1	TCP4_DROME	12 kDa	0.520468		0.777778	4	5	9		2	2	#DIV/0!							0.263158	20	18	38	14	14	28
			2	HRP1; PUB1	SLIRP1* same gene Suppressor Screen	GEO13361p1 OS=Drosophila melanogaster GN=SLIRP1 PE=1 SV=1	Q0KHQ1_DROME	10 kDa	0.517241		-0.230769	5	8	13	7	9	16	1	5	7	12			0	0.0344828	14	15	29	14	14	28
			2	RpL5	RpL5	Ribosomal protein L5, isoform G OS=Drosophila melanogaster GN=RpL5 PE=1 SV=1	R9Q794_DROME (+1)	34 kDa	0.501778		0.135135	17	20	37	18	14	32	0.868421	20	18	38	3	2	5	-0.361111	37	35	72	48	50	98
			2	SSA1; SSA2; SSA3; SSA4; KAR2; SSC1; ECM10; SSQ1; SSE1; SSE2; Ssz1; LHS1;	Hsp68	Cluster of Heat shock protein 68 OS=Drosophila melanogaster GN=Hsp68 PE=1 SV=1 (HSP68_DROME)	HSP68_DROME [4]	70 kDa	0.485294		0.5	8	6	14		7	7	0.470588	8	9	17		9	9	#DIV/0!
			2	NA	CG9497	CG9497, isoform A OS=Drosophila melanogaster GN=CG9497 PE=4 SV=3	Q9VMF1_DROME	48 kDa	0.476087		0.8	3	2	5		1	1	0.152174	27	19	46	19	20	39	#DIV/0!
			2	RPL13A	RpL13A	Cluster of 60S ribosomal protein L13a OS=Drosophila melanogaster GN=RpL13A PE=1 SV=1 (RL13A_DROME)	RL13A_DROME [2]	24 kDa	0.463636		0.2	2	3	5	2	2	4	0.727273	6	5	11	2	1	3	-0.290323	17	14	31	19	21	40
			2	DHH1; FAL1; eLF4A; SUB2; DBP5;	me31B	Putative ATP-dependent RNA helicase me31b OS=Drosophila melanogaster GN=me31B PE=1 SV=3	sp|P23128|DDX6_DROME	52 kDa	0.430078		0.294118	16	18	34	9	15	24	-0.53125	33	31	64	53	45	98	0.566038	26	27	53	10	13	23
			2	NOP58; NOP56	Nop56	FI04781p OS=Drosophila melanogaster GN=Nop56 PE=1 SV=1	Q95WY3_DROME	55 kDa	0.428475		0.769231	7	6	13	1	2	3	-0.166667	2	4	6	4	3	7	0.0877193	27	30	57	31	21	52
			2	RPL12A; RPL12B	RpL12	GEO07602p1 OS=Drosophila melanogaster GN=RpL12 PE=1 SV=1	Q9W1B9_DROME	18 kDa	0.417112		0.470588	8	9	17	5	4	9	0.363636	5	6	11	3	4	7	0	17	19	36	18	18	36
			2	NA	mRpL1	LD31571p OS=Drosophila melanogaster GN=mRpL1 PE=1 SV=2	Q9VHT5_DROME	40 kDa	0.416667		0.5	1	3	4	1	1	2	#DIV/0!							0.333333	10	11	21	8	6	14
			2	Dyn2	Dynein light chain 1	Dynein light chain 1, cytoplasmic OS=Drosophila melanogaster GN=ctp PE=1 SV=1	DYL1_DROME (+1)	10 kDa	0.409091		0.5	1	3	4	1	1	2	0.318182	10	12	22	7	8	15	#DIV/0!
			2	NA	jbug	Jitterbug, isoform M OS=Drosophila melanogaster GN=jbug PE=1 SV=1	A0A0B4KEX6_DROME (+3)	306 kDa	0.40303		0.272727	6	5	11	5	3	8	0.533333	15	15	30	7	7	14	#DIV/0!
			2	NA	mRpS30	GH05406p OS=Drosophila melanogaster GN=mRpS30 PE=1 SV=1	Q9VXP3_DROME	65 kDa	0.4		0.333333	1	2	3	0	2	2	#DIV/0!							0.466667	28	32	60	16	16	32
			2	ACO1; ACO2	Acon	Aconitate hydratase, mitochondrial OS=Drosophila melanogaster GN=Acon PE=1 SV=2	Q9VIE8_DROME	85 kDa	0.395833		0.666667		3	3	1		1	-1.7	11	9	20	31	23	54	0.125	8	8	16	6	8	14
			2	NA	CG8607	CG8607 OS=Drosophila melanogaster GN=Dmel\CG8607 PE=1 SV=2	Q9VS44_DROME	31 kDa	0.389535		0.5	2	2	4	1	1	2	0.27907	23	20	43	17	14	31	#DIV/0!
			2	NA	mRpS18B	LP10852p OS=Drosophila melanogaster GN=mRpS18B PE=1 SV=1	Q9VIN9_DROME	23 kDa	0.388889		0.444444	4	5	9	3	2	5	#DIV/0!							0.333333	9	12	21	9	5	14
			2	TSA1; TSA2; PRX1	Prx3	Peroxiredoxin 3 OS=Drosophila melanogaster GN=Prx3 PE=1 SV=2	Q9VEJ0_DROME	26 kDa	0.383929		0.142857	3	4	7	2	4	6	-0.65	12	8	20	20	13	33	0.625	3	5	8	1	2	3
			2	SNU13	hoip	Hoi-polloi, isoform B OS=Drosophila melanogaster GN=hoip PE=1 SV=1	D2NUK9_DROME	14 kDa	0.373333		0.666667	7	5	12	1	3	4	-0.25	4	4	8	4	6	10	0.08	13	12	25	10	13	23
			2	NA	Bacc	Bacchus OS=Drosophila melanogaster GN=Bacc PE=2 SV=1	BACC_DROME	15 kDa	0.372434		0.454545	6	5	11	3	3	6	#DIV/0!							0.290323	16	15	31	8	14	22
			2	NA	lost	LD30155p OS=Drosophila melanogaster GN=lost PE=1 SV=1	Q9VN21_DROME	60 kDa	0.324756	0.31613	0.269231	10	16	26	8	11	19	-0.214286	14	14	28	18	16	34	0.380282	35	36	71	23	21	44
			2	TAP42	Tap42	LD07294p OS=Drosophila melanogaster GN=Tap42 PE=1 SV=2	Q9VJZ5_DROME	43 kDa	0.324519		0.1875	8	8	16	6	7	13	0.461538	6	7	13	4	3	7	-0.0526316	29	28	57	27	33	60
			2	NA	CG17691	Uncharacterized protein, isoform C OS=Drosophila melanogaster GN=CG17691 PE=1 SV=3	Q7PLE6_DROME	40 kDa	0.3175		0.36	12	13	25	8	8	16	0.275	17	23	40	17	12	29	#DIV/0!
			2	NA	mRpL2	Mitochondrial ribosomal protein L2 OS=Drosophila melanogaster GN=mRpL2 PE=1 SV=1	Q9VTF8_DROME	33 kDa	0.3125		0.25	2	2	4	2	1	3	#DIV/0!							0.375	3	5	8	3	2	5
			2	YMR1	CG14411-RA	FI17948p1 OS=Drosophila melanogaster GN=CG14411-RA PE=2 SV=1	Q9VY15_DROME	94 kDa	0.285714		0.333333	2	1	3	1	1	2	0.238095	11	10	21	9	7	16	#DIV/0!
			2	HDA1; RPD3; HOS2	HDAC6	Histone deacetylase 6, isoform F OS=Drosophila melanogaster GN=HDAC6 PE=1 SV=1	M9NEH6_DROME (+5)	113 kDa	0.278571		0.285714	11	10	21	10	5	15	0.271429	36	34	70	23	28	51	#DIV/0!
			2	NA	Hsp26	Heat shock protein 26, isoform B OS=Drosophila melanogaster GN=Hsp26 PE=3 SV=1	X2JGG6_DROME	23 kDa	0.27	0.298664	0.04	12	13	25	11	13	24	-0.06	28	22	50	27	26	53	0.5	6	4	10	3	2	5
			2	STE20; KIC1	mbt	Serine/threonine-protein kinase PAK mbt OS=Drosophila melanogaster GN=mbt PE=1 SV=2	PAKM_DROME	70 kDa	0.264516		0.4	2	3	5	1	2	3	#DIV/0!							0.129032	15	16	31	13	14	27
			2	calmodulin	Myosin regulatory light chain 2	Myosin regulatory light chain 2 OS=Drosophila melanogaster GN=Mlc2 PE=1 SV=2	MLR_DROME	24 kDa	0.260753		0.354839	17	14	31	13	7	20	0.166667	9	9	18	8	7	15	-0.192982	27	30	57	36	32	68
			2	ERG12	Mevalonate kinase	Mevalonate kinase OS=Drosophila melanogaster GN=CG16804 PE=2 SV=1	Q7K2V9_DROME	42 kDa	0.26		0.4	3	2	5	2	1	3	0.12	12	13	25	10	12	22	#DIV/0!
			2	PGI1	Pgi	Glucose-6-phosphate isomerase OS=Drosophila melanogaster GN=Pgi PE=2 SV=2	G6PI_DROME	62 kDa	0.255772		0.277778	10	8	18	11	2	13	0.233766	40	37	77	30	29	59	#DIV/0!
			2	NA	Myosin alkali light chain 1	Myosin alkali light chain 1, isoform D OS=Drosophila melanogaster GN=Mlc1 PE=1 SV=1	A0A0B4LHS1_DROME (+2)	18 kDa	0.242647		0.235294	9	8	17	6	7	13	0.25	5	7	12	5	4	9	-0.230769	7	6	13	7	9	16
			2	NA	CG8963	CG8963, isoform E OS=Drosophila melanogaster GN=CG8963 PE=1 SV=1	A0A0B4K891_DROME (+1)	58 kDa	0.228629		0.0322581	16	15	31	14	16	30	0.425	19	21	40	12	11	23	-0.343284	33	34	67	47	43	90
			2	NA	eIF-3p66	Cluster of Eukaryotic translation initiation factor 3 subunit D-1 OS=Drosophila melanogaster GN=eIF-3p66 PE=1 SV=1 (EI3D1_DROME)	EI3D1_DROME [4]	64 kDa	0.216747		0.06	24	26	50	26	21	47	-0.72093		43	43	42	32	74	0.373494	90	76	166	50	54	104
			2	RPS0A	sta	40S ribosomal protein SA OS=Drosophila melanogaster GN=sta PE=1 SV=1	X2JC80_DROME (+2)	30 kDa	0.208333		0.333333	6	9	15	5	5	10	0.0833333	7	5	12	5	6	11	-0.0869565	21	25	46	28	22	50
			2	KRS1; MSK1	LysRS	Lysine--tRNA ligase OS=Drosophila melanogaster GN=LysRS PE=1 SV=1	Q8SXM8_DROME (+1)	65 kDa	0.203968		0.222222	3	6	9	3	4	7	0.185714	37	33	70	31	26	57	#DIV/0!
			2	NA	Crag PE	Cluster of Calmodulin-binding protein related to a Rab3 GDP/GTP exchange protein, isoform B OS=Drosophila melanogaster GN=Crag PE=1 SV=3 (Q9W3D2_DROME)	Q9W3D2_DROME [2]	184 kDa	0.187343		0.190476	10	11	21	6	11	17	0.184211	18	20	38	18	13	31	#DIV/0!
			2	KIC1; CDC5; many other kinases	Tao	Serine/threonine-protein kinase Tao OS=Drosophila melanogaster GN=Tao PE=1 SV=1	sp|Q0KHQ5|TAO_DROME	118 kDa	0.183333		0.2	2	3	5	1	3	4	0.166667	4	2	6	2	3	5	#DIV/0!
			2	DPS1	AspRS	SD02215p OS=Drosophila melanogaster GN=AspRS-m PE=1 SV=3	Q9VJH2_DROME	122 kDa	0.181373		0.333333	4	5	9	3	3	6	0.0294118	21	13	34	20	13	33	#DIV/0!
			2	NA	mRpS29	LD41023p OS=Drosophila melanogaster GN=mRpS29 PE=1 SV=1	Q9W253_DROME	44 kDa	0.166129		0.3	4	6	10	3	4	7	#DIV/0!							0.0322581	18	13	31	19	11	30
			2	NA	SP170	CG8329 OS=Drosophila melanogaster GN=SP170 PE=3 SV=1	Q9VT23_DROME	28 kDa	0.142361		0.222222	4	5	9	2	5	7	0.0625	10	6	16	8	7	15	#DIV/0!
			2	RPS5	RpS5a	Cluster of 40S ribosomal protein S5a OS=Drosophila melanogaster GN=RpS5a PE=1 SV=1 (RS5A_DROME)	RS5A_DROME [3]	25 kDa	0.132915		0.163265	26	23	49	23	18	41	0.102564	20	19	39	17	18	35	-0.0909091	24	20	44	23	25	48
			2	RPL3	RpL3	60S ribosomal protein L3 OS=Drosophila melanogaster GN=RpL3 PE=1 SV=3	sp|O16797|RL3_DROME	47 kDa	0.130435		0.130435	9	14	23	10	10	20	0.130435	13	10	23	13	7	20	-0.428571	47	44	91	63	67	130
			2	NA	CG34051	HDC03337 OS=Drosophila melanogaster GN=CG34051 PE=4 SV=1	Q6IH48_DROME	26 kDa	0.10728		0.111111	9	9	18	8	8	16	#DIV/0!							0.103448	15	14	29	13	13	26
			2	NA	fit	Female-specific independent of transformer OS=Drosophila melanogaster GN=fit PE=1 SV=1	Q9VD66_DROME	14 kDa	0.10625		0.0625	8	8	16	7	8	15	0.15	11	9	20	10	7	17	#DIV/0!
			2	RPS19A	RpS19a	Cluster of Ribosomal protein S19a, isoform C OS=Drosophila melanogaster GN=RpS19a PE=1 SV=1 (E2QD65_DROME)	E2QD65_DROME [3]	17 kDa	0.0957143		0.12	14	11	25	11	11	22	0.0714286	8	6	14	6	7	13	-0.0232558	18	25	43	21	23	44
			2	NA	CG3689	CG3689, isoform C OS=Drosophila melanogaster GN=Dmel\CG3689 PE=1 SV=1	Q0E8G6_DROME	27 kDa	0.0883459		0.0714286	7	7	14	7	6	13	0.105263	10	9	19	6	11	17	#DIV/0!
			2	RPS20	RpS20	40S ribosomal protein S20 OS=Drosophila melanogaster GN=RpS20 PE=1 SV=1	RS20_DROME	13 kDa	0.0768116		0.0666667	7	8	15	7	7	14	0.0869565	12	11	23	11	10	21	-0.148148	14	13	27	14	17	31
			2	PRE7	Prosbeta6	Proteasome subunit beta type-1 OS=Drosophila melanogaster GN=Prosbeta6 PE=2 SV=2	PSB1_DROME	26 kDa	0.0542857		0.08	13	12	25	12	11	23	0.0285714	19	16	35	16	18	34	#DIV/0!

## Sheet: c
File 1c: 45 biological triplicate CidB* enriched Hits (RAW DATA). Data Analysis: 1. Input scaffold data. 2. Rank by replicate enriched. 3. Rank by avg-F-score. 4. Remove hits with technical replicate inconsistency (Red boxes from Table S2). 5. Classify into functional categories.
								Peptide Frequency (F-score) = (peptide in CidB*-Peptide in Control)/Peptide in CidB*)
								5.17.17	6.28.17	7.27.17
								JFB 013	JFB 016	JFB 018
		Function	Yeast Ortholog	Name	Drosophila Proteins enriched in CidB compared to BL21-AI negative Control	Accession Number	Molecular Weight	F-Score	F-Score	F-Score	Avg F-Score	STD.s
		Transporters	Srp1	KapA2	Importin subunit alpha OS=Drosophila melanogaster GN=Pen PE=1 SV=2	IMA_DROME	58 kDa	1	1	1	1	0
		Transporters	NMD5; SXM1; CSE1	Moleskin	D-Importin 7/RanBP7 OS=Drosophila melanogaster GN=msk PE=1 SV=1	Q9VSD6_DROME	119 kDa	0.774648	1	0.770732	0.84846	0.131252
		Transcription/Post-transcriptional modification	hsh49	Modulo	Modulo, isoform C OS=Drosophila melanogaster GN=mod PE=1 SV=1	A0A0B4K7G4_DROME (+1)	60 kDa	0.805556	1	0.69802	0.834525	0.15306
		Ribosome stucture/biogenesis/Translation	DOM34	Pelota	Protein pelota OS=Drosophila melanogaster GN=pelo PE=2 SV=2	PELO_DROME	44 kDa	1	0.428571	1	0.809524	0.329914
		Signal transduction mechanisms	HRR25; YCK1; YCK2;	Gilgamesh	Gilgamesh, isoform L OS=Drosophila melanogaster GN=gish PE=1 SV=1	A0A0B4KHL4_DROME	60 kDa	1	0.285714	1	0.761905	0.412393
		DNA replication/repair/packaging/Cell division	NA*protamine removal chaperone	P32	CG6459 protein OS=Drosophila melanogaster GN=P32 PE=1 SV=1	Q7JXC4_DROME	29 kDa	0.805556	0.588235	0.888158	0.76065	0.154922
		Ribosome stucture/biogenesis/Translation	TIF5	eIF5	Eukaryotic translation initiation factor 5 OS=Drosophila melanogaster GN=eIF5 PE=1 SV=1	IF5_DROME	52 kDa	0.622642	1	0.548387	0.723676	0.242166
		Lipid metabolism	SAH1	AhcyL1	Adenosylhomocysteinase OS=Drosophila melanogaster GN=AhcyL1 PE=1 SV=1	Q9VZX9_DROME	57 kDa	0.882353	1	0.237113	0.706489	0.410725
		Transcription/Post-transcriptional modification	CBF5	Nop60B	Nucleolar protein at 60B, isoform C OS=Drosophila melanogaster GN=Nop60B PE=1 SV=1	E1JGV6_DROME (+1)	57 kDa	0.959184	0.833333	0.276596	0.689704	0.363254
		Motility/Intracellular trafficking/Secretion	INP52	Synj	GH06496p OS=Drosophila melanogaster GN=Synj PE=1 SV=1	Q5U0V7_DROME	135 kDa	0.7	0.24	0.988889	0.642963	0.377688
		DNA replication/repair/packaging/Cell division	NA	Dek	Dek, isoform C OS=Drosophila melanogaster GN=Dek PE=1 SV=1	A1ZAK3_DROME (+2)	72 kDa	0.785714	1	0.139706	0.641807	0.447838
		DNA replication/repair/packaging/Cell division	NA	Mapmodulin	Mapmodulin, isoform B OS=Drosophila melanogaster GN=Mapmodulin PE=1 SV=1	B7YZR7_DROME (+3)	29 kDa	0.647059	1	0.229508	0.625522	0.385697
		Amino acid metabolism/transport	NA	Vitellogenin-1	Vitellogenin-1 OS=Drosophila melanogaster GN=Yp1 PE=1 SV=1	VIT1_DROME (+1)	49 kDa	0.885886	0.0243902	0.896725	0.602334	0.500543
		Nucleotide metabolism/transport	NA	Ude	Uracil-DNA degrading factor, isoform B OS=Drosophila melanogaster GN=Ude PE=1 SV=1	Q7KS11_DROME	36 kDa	0.571429	1	0.223684	0.598371	0.388859
		Protein modification/degradation/Chaperones	UBC8; UBC5; UBC11	UbcE2H	CG2257 OS=Drosophila melanogaster GN=UbcE2H PE=1 SV=1	Q7JW03_DROME	21 kDa	0.411765	1	0.361702	0.591156	0.354953
		DNA replication/repair/packaging/Cell division	H2B Nucleosome	H2B	Histone H2B OS=Drosophila melanogaster GN=His2B PE=1 SV=2	H2B_DROME	14 kDa	0.5	0.9	0.351852	0.583951	0.283553
		Signal transduction mechanisms	SPS1; KIC1; STE20	GckIII	FI20177p1 OS=Drosophila melanogaster GN=GckIII PE=1 SV=1	Q9VEN3_DROME	70 kDa	0.111111	0.692308	0.88	0.56114	0.400876
		Ribosome stucture/biogenesis/Translation	sto1p	Cbp80	Cap binding protein 80, isoform B OS=Drosophila melanogaster GN=Cbp80 PE=1 SV=1	E2QD75_DROME	93 kDa	0.642857	0.619048	0.390625	0.550843	0.139263
		Signal transduction mechanisms	NA	Arouser	Arouser, isoform A OS=Drosophila melanogaster GN=aru PE=1 SV=1	Q8IPW1_DROME (+1)	88 kDa	0.307692	0.3125	1	0.540064	0.398323
		Amino acid metabolism/transport	NA	Vitellogenin-2	Vitellogenin-2 OS=Drosophila melanogaster GN=Yp2 PE=1 SV=2	VIT2_DROME (+1)	50 kDa	0.763314	0.285714	0.569231	0.53942	0.240191
		Ribosome stucture/biogenesis/Translation	SMD2	SmD2	Probable small nuclear ribonucleoprotein Sm D2 OS=Drosophila melanogaster GN=SmD2 PE=1 SV=1	SMD2_DROME	14 kDa	0.5	0.666667	0.354839	0.507168	0.156038
		Transporters	NA	CG7488	CG7488 OS=Drosophila melanogaster GN=CG7488 PE=2 SV=2 iron transporter	Q9VG07_DROME	42 kDa	0.142857	0.785714	0.5625	0.497024	0.326392
		Protein modification/degradation/Chaperones	UFD4	ctrip	Circadian trip, isoform E OS=Drosophila melanogaster GN=ctrip PE=1 SV=1	A0A0B4JCV6_DROME (+8)	314 kDa	0.25	0.888889	0.333333	0.490741	0.347315
		DNA replication/repair/packaging/Cell division	Uaf30	Non2	LD45195p OS=Drosophila melanogaster GN=Non2 PE=1 SV=1	Q9VZY0_DROME	27 kDa	0.105263	1	0.348485	0.484583	0.462634
		Ribosome stucture/biogenesis/Translation	NA	mRpL37	LD25118p OS=Drosophila melanogaster GN=mRpL37 PE=1 SV=3	Q9VGW9_DROME	46 kDa	0.6	0.5	0.35	0.483333	0.125831
		Signal transduction mechanisms	NA	Cdep	Cluster of Chondrocyte-derived ezrin-like domain containing protein ortholog, isoform F OS=Drosophila melanogaster GN=Cdep PE=1 SV=1 (A0A0C4DHA1_DROME)	A0A0C4DHA1_DROME [3]	132 kDa	0.285714	0.473684	0.666667	0.475355	0.190482
		Ribosome stucture/biogenesis/Translation	NA	mRpS22	GH07821p OS=Drosophila melanogaster GN=mRpS22 PE=1 SV=1	Q9VAY9_DROME	46 kDa	0.684211	0.6	0.125	0.469737	0.301505
		Transcription/Post-transcriptional modification	NA	l(3)72Ab	Putative U5 small nuclear ribonucleoprotein 200 kDa helicase OS=Drosophila melanogaster GN=l(3)72Ab PE=2 SV=4	U520_DROME	245 kDa	0.5	0.122449	0.774194	0.465548	0.327235
		Transcription/Post-transcriptional modification	NA	yps	Ypsilon schachtel, isoform B OS=Drosophila melanogaster GN=yps PE=1 SV=1	M9NFR5_DROME (+1)	37 kDa	0.142857	0.75	0.5	0.464286	0.305143
		Signal transduction mechanisms	BMH2	14-3-3zeta	14-3-3zeta, isoform K OS=Drosophila melanogaster GN=14-3-3zeta PE=1 SV=1	A0A0B4KEH0_DROME (+1)	28 kDa	0.545455	0.25	0.5625	0.452652	0.175708
		Protein modification/degradation/Chaperones	ubiquitin	Ubiquitin	Cluster of Ubiquitin-40S ribosomal protein S27a OS=Drosophila melanogaster GN=RpS27A PE=1 SV=2 (RS27A_DROME)	RS27A_DROME [4]	18 kDa	0.636364	0.0526316	0.617021	0.435339	0.331575
		Protein modification/degradation/Chaperones	NA	CG6153	CG6153, isoform C OS=Drosophila melanogaster GN=CG6153 PE=4 SV=2	E1JHG8_DROME (+1)	24 kDa	0.4	0.189189	0.625	0.40473	0.217944
		Transcription/Post-transcriptional modification	NA	bsf	Bicoid stability factor OS=Drosophila melanogaster GN=bsf PE=1 SV=2	Q9VJ86_DROME	157 kDa	0.0503597	0.964824	0.186837	0.400673	0.493311
		Nucleotide metabolism/transport	Ade4	Prat2	Amidophosphoribosyltransferase OS=Drosophila melanogaster GN=Prat2 PE=2 SV=1	Q967S0_DROME	59 kDa	0.727273	0.0731707	0.310345	0.370263	0.331142
		Ribosome stucture/biogenesis/Translation	RPP0	RpLP0	60S acidic ribosomal protein P0 OS=Drosophila melanogaster GN=RpLP0 PE=3 SV=1	M9PG76_DROME (+1)	34 kDa	0.483871	0.285714	0.337662	0.369083	0.102747
		Ribosome stucture/biogenesis/Translation	MSW1	TrpRS-m	FI03887p OS=Drosophila melanogaster GN=TrpRS-m PE=1 SV=1	Q9VVL8_DROME	73 kDa	0.25	0.30303	0.5	0.35101	0.131725
		Protein modification/degradation/Chaperones	HSP90	Hsp83	Heat shock protein 83, isoform B OS=Drosophila melanogaster GN=Hsp83 PE=3 SV=1	M9PBL3_DROME	82 kDa	0.25	0.125	0.4375	0.270833	0.157288
		Ribosome stucture/biogenesis/Translation	NA	mRpS10	Isoform A of 28S ribosomal protein S10, mitochondrial OS=Drosophila melanogaster GN=mRpS10	sp|Q9VFB2-2|RT10_DROME (+1)	19 kDa	0.125	0.333333	0.315789	0.258041	0.11555
		Ribosome stucture/biogenesis/Translation	MNP1	mRpL12	GM03767p OS=Drosophila melanogaster GN=mRpL12 PE=1 SV=1	Q9VSR5_DROME	20 kDa	0.142857	0.125	0.4	0.222619	0.153876
		DNA replication/repair/packaging/Cell division	Nap1 H2A/B chaperone	Nap1	LD21576p OS=Drosophila melanogaster GN=Nap1 PE=1 SV=1	Q9W1G7_DROME	43 kDa	0.222222	0.195652	0.223404	0.21376	0.0156926
		Ribosome stucture/biogenesis/Translation	RPS9A	RpS9	LD13662p OS=Drosophila melanogaster GN=RpS9 PE=1 SV=1	C6SUW3_DROME (+1)	23 kDa	0.3	0.0588235	0.244444	0.201089	0.126298
		Ribosome stucture/biogenesis/Translation	RPS2	RpS2	Ribosomal protein S2, isoform B OS=Drosophila melanogaster GN=RpS2 PE=3 SV=1	M9PB84_DROME (+1)	29 kDa	0.171429	0.135135	0.255102	0.187222	0.0615231
		Ribosome stucture/biogenesis/Translation	RPL11B	RpL11	Ribosomal protein L11, isoform B OS=Drosophila melanogaster GN=RpL11 PE=1 SV=1	A0A0B4LGZ5_DROME (+1)	21 kDa	0.125	0.333333	0.0869565	0.181763	0.132635
		Inorganic ion metabolism/transport	NA	Caix	Caix OS=Drosophila melanogaster GN=caix PE=4 SV=2	Q9VB76_DROME	35 kDa	0.125	0.333333	0.0769231	0.178419	0.136296
		Ribosome stucture/biogenesis/Translation	RPS26B	RpS26	40S ribosomal protein S26 OS=Drosophila melanogaster GN=RpS26 PE=3 SV=1	M9PG47_DROME (+1)	13 kDa	0.272727	0.1	0.0555556	0.142761	0.114727
Amino Acid Metabolism/Transport	2
DNA Replication/Repair/ Packaging/Cell Division	6
Inorganic Ion Metabolism/Transport	1
Lipid Metabolism	1
Motility/Intracellular Trafficking/Secretion	1
Nucleotide Metabolism/Transport	2
Protein Modification/ Degradation/Chaperones	5
Ribosome Structure/ Biogenesis/Translation	14
Signal Transduction Mechanisms	4
Transcription/Post-Transcriptional Modification	6
Transporters	3

## Sheet: d
File 1d: Compiled CidB* + CidA interactome data (RAW DATA). Data Analysis: 1. Input scaffold data. 2. Rank by biological replicates of enrichment. 3. Rank by avg-Frequency-score (F-score). 238 total enriched proteins with at least 2 biological replicates; 74 with 3 biological replicates Red boxes indicate where a technical replicate was inconsistent ie. zero pepetides in one technical replicate b…
											10.11.17							10.17.17							11.9.17
												CidB* + CidA			BL21-AI + CidA				CidB* + CidA			BL21-AI + CidA				CidB* + CidA			BL21-AI + CidA
												Peptide Spectra			Peptide Spectra				Peptide Spectra			Peptide Spectra				Peptide Spectra			Peptide Spectra
		inconsistency	Replicates	Yeast Ortholog	Drosophila Name	Bio View:1311 Proteins in 1223 Clusters<BR>With 270 Filtered Out	Accession Number	Molecular Weight	avg fscore	std.s	F-score	JFB_022.1	JFB_022.2	SUM	JFB_021.1	JFB_021.2	SUM	F-score	JFB_024.1	JFB_024.2	SUM	JFB_023.1	JFB_023.2	SUM	F-score	JFB_026.1	JFB_026.2	SUM	JFB_025.1	JFB_025.2	SUM
			3			39S ribosomal protein L11, mitochondrial OS=Drosophila melanogaster GN=mRpL11 PE=1 SV=1	RM11_DROME	22 kDa	1	0	1	2	1	3	0	0	0	1	4	3	7			0	1	4	2	6			0
			3			Protein kinase C delta, isoform E OS=Drosophila melanogaster GN=Pkcdelta PE=4 SV=3	Q9VYN1_DROME	207 kDa	0.904762	0.164957	0.714286	12	9	21	4	2	6	1	8	6	14			0	1	23	26	49			0
		x	3			BRWD3 OS=Drosophila melanogaster GN=BRWD3 PE=1 SV=2	Q9VC96_DROME	249 kDa	0.904762	0.164957	0.714286	4	3	7		2	2	1		1	1			0	1	2	4	6			0
		x	3			MAP kinase kinase 4, isoform A OS=Drosophila melanogaster GN=Mkk4 PE=1 SV=1	O61444_DROME	48 kDa	0.904762	0.164957	0.714286	3	4	7	1	1	2	1	1		1			0	1	17	14	31			0
			3			Probable ribosome biogenesis protein CG4338 OS=Drosophila melanogaster GN=CG4338 PE=2 SV=1	Q9VFA0_DROME	30 kDa	0.867196	0.0727451	0.8	3	2	5		1	1	0.857143	7	7	14	1	1	2	0.944444	9	9	18		1	1
			3			Adaptor protein complex AP-3 small chain sigma3 OS=Drosophila melanogaster GN=or PE=1 SV=2	Q9W1E8_DROME	22 kDa	0.857143	0.247436	0.571429	7	7	14	4	2	6	1	1	1	2			0	1	7	6	13			0
		x	3			CG7668, isoform A OS=Drosophila melanogaster GN=BcDNA:GM07843 PE=1 SV=2	Q9VW70_DROME	48 kDa	0.856522	0.150425	0.7	12	8	20	4	2	6	1	0	2	2			0	0.869565	12	11	23	2	1	3
			3			General transcription factor IIF subunit 1 OS=Drosophila melanogaster GN=TfIIFalpha PE=1 SV=3	T2FA_DROME	64 kDa	0.816092	0.318538	0.448276	12	17	29	7	9	16	1	4	3	7			0	1	8	6	14	0	0	0
			3			Isoform A of La-related protein CG11505 OS=Drosophila melanogaster GN=CG11505	Y1505_DROME (+1)	161 kDa	0.8003	0.218101	1	2	1	3			0	0.567568	19	18	37	7	9	16	0.833333	6	6	12	1	1	2
			3			sp|Q9VLK2|Y3096_DROME Ribosomal L1 domain-containing protein CG13096 OS=Drosophila melanogaster GN=CG13096 PE=1 SV=1	sp|Q9VLK2|Y3096_DROMERibosomal L1 domain-containing protein CG13096 OS=Drosophila melanogaster GN=CG13096 PE=1 SV=1	?	0.79627	0.320139	0.427273	55	55	110	31	32	63	0.961538	12	14	26	1		1	1	7	7	14	0		0
			3			Isoform Class 2 of Protein bunched, class 2/F/G isoform OS=Drosophila melanogaster GN=bun	sp|Q24523-1|BUN2_DROME	125 kDa	0.78655	0.240283	1	1	1	2			0	0.526316	6	13	19	4	5	9	0.833333	9	9	18	2	1	3
			3			Pak3, isoform D OS=Drosophila melanogaster GN=Pak3 PE=1 SV=1	A0A0B4KGS4_DROME	66 kDa	0.755358	0.34273	0.363636	35	31	66	18	24	42	1	2	1	3			0	0.902439	22	19	41	1	3	4
			3			Uncharacterized protein, isoform C OS=Drosophila melanogaster GN=CG10341 PE=1 SV=1	A0A023GQ99_DROME (+1)	62 kDa	0.75	0.433013	0.25	11	9	20	8	7	15	1	4	3	7			0	1	14	12	26			0
			3			AP-3 complex subunit beta OS=Drosophila melanogaster GN=rb PE=1 SV=1	Q9W4K1_DROME	127 kDa	0.739113	0.24686	0.455285	59	64	123	30	37	67	0.903846	25	27	52	3	2	5	0.858209	68	66	134	11	8	19
			3			GH03795p OS=Drosophila melanogaster GN=Dmel\CG18178 PE=1 SV=1	Q9VT38_DROME	43 kDa	0.727156	0.3561	0.324324	19	18	37	14	11	25	1	2	4	6			0	0.857143	4	3	7	1		1
			3			Cluster of AP-3 complex subunit delta OS=Drosophila melanogaster GN=g PE=1 SV=4 (AP3D_DROME)	AP3D_DROME [2]	115 kDa	0.705141	0.246642	0.421053	41	35	76	22	22	44	0.829787	21	26	47	4	4	8	0.864583	50	46	96	6	7	13
			3			Cluster of sp|Q26365-2|ADT_DROME Isoform A of ADP,ATP carrier protein OS=Drosophila melanogaster GN=sesB (sp|Q26365-2|ADT_DROMEIsoform A of ADP,ATP carrier protein OS=Drosophila melanogaster GN=sesB)	sp|Q26365-2|ADT_DROMEIsoform A of ADP,ATP carrier protein OS=Drosophila melanogaster GN=sesB [2]	?	0.692063	0.476793	0.933333	6	9	15	1	0	1	0.142857	7	7	14	5	7	12	1	3	2	5			0
			3			sp|Q9W2D9|EIF3K_DROME Eukaryotic translation initiation factor 3 subunit K OS=Drosophila melanogaster GN=CG10306 PE=2 SV=1	sp|Q9W2D9|EIF3K_DROMEEukaryotic translation initiation factor 3 subunit K OS=Drosophila melanogaster GN=CG10306 PE=2 SV=1	?	0.688034	0.540341	0.0641026	35	43	78	37	36	73	1	9	11	20			0	1	4	4	8			0
			3			LD30439p OS=Drosophila melanogaster GN=CG12608 PE=1 SV=2	Q9VXW3_DROME	49 kDa	0.687302	0.381735	0.261905	22	20	42	14	17	31	1	7	9	16	0		0	0.8	13	12	25	3	2	5
			3			GH16248p OS=Drosophila melanogaster GN=Pitslre PE=1 SV=1	D3PFF6_DROME (+1)	89 kDa	0.675926	0.281	0.527778	15	21	36	8	9	17	0.5	3	3	6	2	1	3	1	4	3	7			0
			3			Cluster of GH01093p OS=Drosophila melanogaster GN=sals PE=1 SV=1 (Q58CJ5_DROME)	Q58CJ5_DROME [2]	101 kDa	0.671802	0.320108	0.305882	42	43	85	33	26	59	0.809524	11	10	21	2	2	4	0.9	15	15	30	1	2	3
			3			RNA polymerase II transcriptional coactivator OS=Drosophila melanogaster GN=Ssb-c31a PE=2 SV=1	TCP4_DROME	12 kDa	0.666667	0.359516	0.285714	10	11	21	8	7	15	1	1	3	4			0	0.714286	7	7	14	2	2	4
			3			MIP15217p OS=Drosophila melanogaster GN=mfas PE=1 SV=1	D3DMM4_DROME (+6)	88 kDa	0.665094	0.387234	0.224719	48	41	89	35	34	69	0.818182	6	5	11	0	2	2	0.952381	12	9	21	1	0	1
			3			sp|Q9NBK5-2|TRC_DROME Isoform A of Serine/threonine-protein kinase tricorner OS=Drosophila melanogaster GN=trc	sp|Q9NBK5-2|TRC_DROMEIsoform A of Serine/threonine-protein kinase tricorner OS=Drosophila melanogaster GN=trc	?	0.65625	0.34375	1	1	1	2			0	0.3125	13	19	32	11	11	22	0.65625	31	33	64	10	12	22
			3			CG4069 OS=Drosophila melanogaster GN=anon-WO0172774.58 PE=1 SV=1	Q9VTZ7_DROME	56 kDa	0.65191	0.166199	0.46875	17	15	32	7	10	17	0.793103	14	15	29	2	4	6	0.693878	25	24	49	8	7	15
			3			Chromatin accessibility complex 14kD protein OS=Drosophila melanogaster GN=Chrac-14 PE=1 SV=1	Q9V444_DROME	14 kDa	0.651515	0.302651	0.454545	5	6	11	3	3	6	1	1	1	2			0	0.5	4	4	8	2	2	4
			3			General transcription factor IIF subunit 2 OS=Drosophila melanogaster GN=TfIIFbeta PE=2 SV=2	T2FB_DROME	32 kDa	0.646825	0.414507	0.190476	10	11	21	10	7	17	0.75	4	4	8	1	1	2	1	8	5	13			0
			3			sp|Q05344|SSRP1_DROME FACT complex subunit Ssrp1 OS=Drosophila melanogaster GN=Ssrp PE=1 SV=2	sp|Q05344|SSRP1_DROMEFACT complex subunit Ssrp1 OS=Drosophila melanogaster GN=Ssrp PE=1 SV=2	?	0.64658	0.267356	0.340659	46	45	91	30	30	60	0.763636	25	30	55	6	7	13	0.835443	39	40	79	7	6	13
			3			LD10773p OS=Drosophila melanogaster GN=Ns4 PE=1 SV=1	Q9VIJ9_DROME	67 kDa	0.645635	0.432161	0.164179	32	35	67	28	28	56	1	2	2	4			0	0.772727	13	9	22	2	3	5
		x	3			Golgi matrix protein 130 kD ortholog OS=Drosophila melanogaster GN=GM130 PE=1 SV=2	Q9W289_DROME	91 kDa	0.645507	0.326129	1		1	1			0	0.358209	36	31	67	20	23	43	0.578313	39	44	83	16	19	35
		x	3			sp|Q9VAU9|ZN330_DROME Zinc finger protein 330 homolog OS=Drosophila melanogaster GN=Noa36 PE=2 SV=1	sp|Q9VAU9|ZN330_DROMEZinc finger protein 330 homolog OS=Drosophila melanogaster GN=Noa36 PE=2 SV=1	?	0.637363	0.443526	0.142857	12	9	21	9	9	18	1		1	1			0	0.769231	6	7	13	2	1	3
		x	3			sp|Q8IQ13|EIF1A_DROME Probable RNA-binding protein EIF1AD OS=Drosophila melanogaster GN=CG31957 PE=2 SV=1	sp|Q8IQ13|EIF1A_DROMEProbable RNA-binding protein EIF1AD OS=Drosophila melanogaster GN=CG31957 PE=2 SV=1	?	0.636508	0.366708	0.266667	7	8	15	4	7	11	1		2	2			0	0.642857	8	6	14		5	5
			3			sp|Q9VTU4|EIF3L_DROME Eukaryotic translation initiation factor 3 subunit L OS=Drosophila melanogaster GN=CG5642 PE=2 SV=1	sp|Q9VTU4|EIF3L_DROMEEukaryotic translation initiation factor 3 subunit L OS=Drosophila melanogaster GN=CG5642 PE=2 SV=1	?	0.634921	0.495063	0.0714286	33	37	70	32	33	65	0.833333	5	7	12	1	1	2	1	3	1	4			0
			3			Signal recognition particle 54 kDa protein OS=Drosophila melanogaster GN=Srp54k PE=1 SV=1	Q9V3D9_DROME	56 kDa	0.634016	0.540541	0.0131579	36	40	76	38	37	75	1	3	3	6	0	0	0	0.888889	6	3	9		1	1
			3			Isoform A of FACT complex subunit spt16 OS=Drosophila melanogaster GN=dre4	SPT16_DROME	128 kDa	0.631428	0.21	0.393443	61	61	122	39	35	74	0.710145	35	34	69	12	8	20	0.790698	41	45	86	8	10	18
		x	3			GH03554p OS=Drosophila melanogaster GN=Sf3a1 PE=1 SV=1	Q9VEP9_DROME	88 kDa	0.62334	0.314798	0.5	0	2	2	0	1	1	0.388889	25	29	54	15	18	33	0.981132	26	27	53	1	0	1
			3			60S ribosomal protein L5 OS=Drosophila melanogaster GN=RpL5 PE=1 SV=2	RL5_DROME	34 kDa	0.619048	0.343386	0.333333	29	28	57	21	17	38	0.52381	10	11	21	5	5	10	1	3	3	6	0	0	0
			3			RE62581p OS=Drosophila melanogaster GN=RpL21 PE=1 SV=1	Q9V9M7_DROME	18 kDa	0.615432	0.356386	0.296296	13	14	27	7	12	19	0.55	10	10	20	5	4	9	1	2	3	5	0		0
			3			Dek, isoform C OS=Drosophila melanogaster GN=Dek PE=1 SV=1	A1ZAK3_DROME (+2)	72 kDa	0.611051	0.527031	0.011236	44	45	89	43	45	88	1	14	17	31			0	0.821918	38	35	73	7	6	13
			3			Lariat debranching enzyme OS=Drosophila melanogaster GN=ldbr PE=2 SV=1	DBR1_DROME	59 kDa	0.610802	0.467075	0.0740741	25	29	54	28	22	50	0.833333	12	12	24	2	2	4	0.925	23	17	40	1	2	3
			3			Carmine, isoform A OS=Drosophila melanogaster GN=cm PE=1 SV=1	O76928_DROME	47 kDa	0.609432	0.316454	0.25	23	17	40	17	13	30	0.846154	12	14	26	2	2	4	0.732143	27	29	56	8	7	15
			3			sp|Q9W4D2|RNP4F_DROME RNA-binding protein 4F OS=Drosophila melanogaster GN=Rnp4F PE=1 SV=1	sp|Q9W4D2|RNP4F_DROMERNA-binding protein 4F OS=Drosophila melanogaster GN=Rnp4F PE=1 SV=1	?	0.603192	0.386014	0.157895	44	51	95	41	39	80	0.842857	34	36	70	7	4	11	0.808824	32	36	68	6	7	13
			3			Isoform D of 14-3-3 protein epsilon OS=Drosophila melanogaster GN=14-3-3epsilon	sp|P92177-1|1433E_DROME (+3)	30 kDa	0.60119	0.346416	0.375	5	3	8	2	3	5	0.428571	4	3	7	2	2	4	1	5	3	8			0
			3			sp|Q0E940|EIF3B_DROME Eukaryotic translation initiation factor 3 subunit B OS=Drosophila melanogaster GN=eIF3-S9 PE=1 SV=1	sp|Q0E940|EIF3B_DROMEEukaryotic translation initiation factor 3 subunit B OS=Drosophila melanogaster GN=eIF3-S9 PE=1 SV=1	?	0.59969	0.465393	0.0703125	63	65	128	60	59	119	0.784314	28	23	51	5	6	11	0.944444	8	10	18	1		1
			3			sp|Q9U9Q4|EIF3H_DROME Eukaryotic translation initiation factor 3 subunit H OS=Drosophila melanogaster GN=eIF-3p40 PE=1 SV=2	sp|Q9U9Q4|EIF3H_DROMEEukaryotic translation initiation factor 3 subunit H OS=Drosophila melanogaster GN=eIF-3p40 PE=1 SV=2	?	0.59604	0.367151	0.188119	50	51	101	41	41	82	0.7	18	12	30	5	4	9	0.9	11	9	20	1	1	2
			3			sp|P54397|FKB39_DROME 39 kDa FK506-binding nuclear protein OS=Drosophila melanogaster GN=FK506-bp1 PE=1 SV=2	sp|P54397|FKB39_DROME39 kDa FK506-binding nuclear protein OS=Drosophila melanogaster GN=FK506-bp1 PE=1 SV=2	?	0.595255	0.401281	0.197531	38	43	81	35	30	65	0.588235	18	16	34	8	6	14	1	8	6	14		0	0
			3			Cluster of Serrate RNA effector molecule homolog OS=Drosophila melanogaster GN=Ars2 PE=1 SV=2 (SRRT_DROME)	SRRT_DROME [2]	107 kDa	0.593762	0.368487	0.175	59	61	120	51	48	99	0.868421	19	19	38	2	3	5	0.737864	54	49	103	15	12	27
			3			RNA polymerase-associated protein Rtf1 OS=Drosophila melanogaster GN=Rtf1 PE=1 SV=1	RTF1_DROME	88 kDa	0.592229	0.400657	0.15	10	10	20	8	9	17	0.695652	11	12	23	2	5	7	0.931034	13	16	29	1	1	2
			3			Cluster of Shaggy, isoform M OS=Drosophila melanogaster GN=sgg PE=1 SV=1 (A8JUV9_DROME)	A8JUV9_DROME [2]	78 kDa	0.583791	0.162814	0.517857	28	28	56	15	12	27	0.464286	13	15	28	7	8	15	0.769231	28	24	52	7	5	12
			3			sp|Q9VN25|EIF3A_DROME Eukaryotic translation initiation factor 3 subunit A OS=Drosophila melanogaster GN=eIF3-S10 PE=1 SV=1	sp|Q9VN25|EIF3A_DROMEEukaryotic translation initiation factor 3 subunit A OS=Drosophila melanogaster GN=eIF3-S10 PE=1 SV=1	?	0.583537	0.418207	0.122905	90	89	179	80	77	157	0.688312	39	38	77	14	10	24	0.939394	21	12	33	2		2
			3			Cluster of sp|O02195|EIF3I_DROME Eukaryotic translation initiation factor 3 subunit I OS=Drosophila melanogaster GN=Trip1 PE=1 SV=1 (sp|O02195|EIF3I_DROMEEukaryotic translation initiation factor 3 subunit I OS=Drosophila melanogaster GN=Trip1 PE=1 SV=1)	sp|O02195|EIF3I_DROMEEukaryotic translation initiation factor 3 subunit I OS=Drosophila melanogaster GN=Trip1 PE=1 SV=1 [2]	?	0.559091	0.448796	0.102804	56	51	107	49	47	96	0.574468	26	21	47	12	8	20	1	7	8	15			0
			3			CG2025 OS=Drosophila melanogaster GN=CG2025-RA PE=1 SV=2	Q9VYT3_DROME	133 kDa	0.55085	0.328525	0.180851	92	96	188	72	82	154	0.663366	51	50	101	16	18	34	0.808333	60	60	120	11	12	23
			3			Signal recognition particle subunit SRP72 OS=Drosophila melanogaster GN=Srp72 PE=1 SV=1	Q9VDK7_DROME	73 kDa	0.54165	0.441552	0.037037	68	67	135	64	66	130	0.730769	14	12	26	4	3	7	0.857143	18	17	35	3	2	5
			3			GEO13361p1 OS=Drosophila melanogaster GN=SLIRP1 PE=1 SV=1	Q0KHQ1_DROME	10 kDa	0.541253	0.366748	0.12	14	11	25	11	11	22	0.714286	6	8	14	2	2	4	0.789474	9	10	19	2	2	4
			3			sp|Q7JVI3|EIF3M_DROME Eukaryotic translation initiation factor 3 subunit M OS=Drosophila melanogaster GN=Tango7 PE=2 SV=1	sp|Q7JVI3|EIF3M_DROMEEukaryotic translation initiation factor 3 subunit M OS=Drosophila melanogaster GN=Tango7 PE=2 SV=1	?	0.536641	0.437595	0.0446429	55	57	112	52	55	107	0.682927	19	22	41	4	9	13	0.882353	7	10	17	1	1	2
			3			LD45195p OS=Drosophila melanogaster GN=Non2 PE=1 SV=1	Q9VZY0_DROME	27 kDa	0.495326	0.396662	0.15	20	20	40	15	19	34	0.928571	7	7	14	1	0	1	0.407407	14	13	27	9	7	16
			3			Isoform A of Serine-arginine protein 55 OS=Drosophila melanogaster GN=B52	sp|P26686-2|SRR55_DROME (+3)	40 kDa	0.493182	0.447087	0.0666667	29	31	60	25	31	56	0.454545	6	5	11	3	3	6	0.958333	12	12	24	1	0	1
			3			Molecule interacting with CasL, isoform K OS=Drosophila melanogaster GN=Mical PE=4 SV=1	A0A0B4K703_DROME	526 kDa	0.479216	0.114091	0.43956	45	46	91	23	28	51	0.390244	40	42	82	25	25	50	0.607843	23	28	51	12	8	20
			3			AT14585p OS=Drosophila melanogaster GN=mil PE=2 SV=2	Q9VAZ1_DROME	33 kDa	0.467652	0.361701	0.16129	16	15	31	13	13	26	0.866667	5	10	15	1	1	2	0.375	9	7	16	4	6	10
			3			40S ribosomal protein S17 OS=Drosophila melanogaster GN=RpS17 PE=1 SV=2	RS17_DROME	15 kDa	0.463658	0.285384	0.220339	31	28	59	22	24	46	0.392857	13	15	28	9	8	17	0.777778	16	20	36	5	3	8
			3			Bicoid stability factor OS=Drosophila melanogaster GN=bsf PE=1 SV=2	Q9VJ86_DROME	157 kDa	0.453342	0.272109	0.15896	172	174	346	149	142	291	0.695652	97	87	184	26	30	56	0.505415	138	139	277	67	70	137
			3			CG8963, isoform E OS=Drosophila melanogaster GN=CG8963 PE=1 SV=1	A0A0B4K891_DROME (+1)	58 kDa	0.444444	0.267879	0.75	4	4	8	1	1	2	0.333333	22	20	42	13	15	28	0.25	22	22	44	16	17	33
			3			Cluster of Nopp140, isoform E OS=Drosophila melanogaster GN=Nopp140 PE=1 SV=1 (M9PFZ1_DROME)	M9PFZ1_DROME [2]	78 kDa	0.403419	0.299916	0.466667	7	8	15	4	4	8	0.0769231	8	5	13	7	5	12	0.666667	6	6	12	1	3	4
			3			60S ribosomal protein L24 OS=Drosophila melanogaster GN=RpL24 PE=1 SV=1	RL24_DROME	18 kDa	0.400463	0.274664	0.0833333	6	6	12	5	6	11	0.5625	8	8	16	4	3	7	0.555556	5	4	9	2	2	4
			3			sp|O77410|EIF3E_DROME Eukaryotic translation initiation factor 3 subunit E OS=Drosophila melanogaster GN=eIF3-S6 PE=1 SV=1	sp|O77410|EIF3E_DROMEEukaryotic translation initiation factor 3 subunit E OS=Drosophila melanogaster GN=eIF3-S6 PE=1 SV=1	?	0.365305	0.475142	0.156522	54	61	115	49	48	97	0.030303	17	16	33	15	17	32	0.909091	6	5	11		1	1
			3			GEO07602p1 OS=Drosophila melanogaster GN=RpL12 PE=1 SV=1	Q9W1B9_DROME	18 kDa	0.360965	0.380571	0.157895	9	10	19	7	9	16	0.125	7	9	16	5	9	14	0.8	8	7	15	1	2	3
			3			sp|Q9VN50|EI3F1_DROME Eukaryotic translation initiation factor 3 subunit F-1 OS=Drosophila melanogaster GN=eIF3-S5-1 PE=2 SV=1	sp|Q9VN50|EI3F1_DROMEEukaryotic translation initiation factor 3 subunit F-1 OS=Drosophila melanogaster GN=eIF3-S5-1 PE=2 SV=1	?	0.321385	0.229614	0.12	35	40	75	31	35	66	0.571429	12	9	21	3	6	9	0.272727	5	6	11	4	4	8
			3			6-pyruvoyl tetrahydrobiopterin synthase OS=Drosophila melanogaster GN=pr PE=1 SV=1	PTPS_DROME	19 kDa	0.319553	0.0854101	0.245614	33	24	57	20	23	43	0.3	21	19	40	15	13	28	0.413043	24	22	46	16	11	27
			3			40S ribosomal protein S9 OS=Drosophila melanogaster GN=RpS9 PE=1 SV=2	RS9_DROME	23 kDa	0.313504	0.328079	0.128205	20	19	39	15	19	34	0.12	12	13	25	10	12	22	0.692308	11	15	26	5	3	8
			3			FI01658p OS=Drosophila melanogaster GN=RpL23A PE=1 SV=1	Q9W0A8_DROME	29 kDa	0.286725	0.3703	0.0689655	15	14	29	14	13	27	0.0769231	12	14	26	11	13	24	0.714286	3	4	7	1	1	2
			3			GM14292p OS=Drosophila melanogaster GN=CG11444 PE=1 SV=1	Q9W4J4_DROME	23 kDa	0.263805	0.107501	0.15	12	8	20	7	10	17	0.277778	9	9	18	7	6	13	0.363636	16	17	33	11	10	21
			3			sp|P39018|RS19A_DROME 40S ribosomal protein S19a OS=Drosophila melanogaster GN=RpS19a PE=1 SV=3	sp|P39018|RS19A_DROME40S ribosomal protein S19a OS=Drosophila melanogaster GN=RpS19a PE=1 SV=3	?	0.254048	0.118227	0.125	8	8	16	7	7	14	0.28	14	11	25	9	9	18	0.357143	7	7	14	6	3	9
			3			40S ribosomal protein S6 OS=Drosophila melanogaster GN=RpS6 PE=1 SV=1	RS6_DROME	28 kDa	0.228973	0.213031	0.148148	15	12	27	11	12	23	0.0681818	25	19	44	20	21	41	0.470588	8	9	17	3	6	9
			3			Cluster of sp|P11147|HSP7D_DROME Heat shock 70 kDa protein cognate 4 OS=Drosophila melanogaster GN=Hsc70-4 PE=1 SV=3 (sp|P11147|HSP7D_DROMEHeat shock 70 kDa protein cognate 4 OS=Drosophila melanogaster GN=Hsc70-4 PE=1 SV=3)	sp|P11147|HSP7D_DROMEHeat shock 70 kDa protein cognate 4 OS=Drosophila melanogaster GN=Hsc70-4 PE=1 SV=3 [4]	?	0.160752	0.141786	0.0238095	67	59	126	63	60	123	0.151515	81	84	165	66	74	140	0.306931	51	50	101	36	34	70
			2			CG8677, isoform B OS=Drosophila melanogaster GN=CG8677 PE=1 SV=3	Q9VID9_DROME	293 kDa	1		1	4	6	10	0	0	0								1	3	3	6			0
			2			Receptor-mediated endocytosis protein 6 homolog OS=Drosophila melanogaster GN=CG1657 PE=1 SV=2	RME6_DROME	191 kDa	1									1	4	3	7			0	1	6	9	15			0
			2			sp|Q9VFG8|KIBRA_DROME Protein kibra OS=Drosophila melanogaster GN=kibra PE=1 SV=2	sp|Q9VFG8|KIBRA_DROMEProtein kibra OS=Drosophila melanogaster GN=kibra PE=1 SV=2	?	1									1	1	3	4	0	0	0	1	4	8	12			0
			2			Chromodomain-helicase-DNA-binding protein 1 OS=Drosophila melanogaster GN=Chd1 PE=1 SV=1	CHD1_DROME (+2)	212 kDa	0.980769		0.961538	12	14	26	0	1	1	1	1	3	4		0	0
			2			Cluster of LD15002p OS=Drosophila melanogaster GN=Pur-alpha PE=1 SV=1 (Q95RR6_DROME)	Q95RR6_DROME [2]	31 kDa	0.970588									0.941176	8	9	17	1	0	1	1	2	7	9			0
			2			Uncharacterized protein, isoform D OS=Drosophila melanogaster GN=CG43658 PE=1 SV=2	E1JJN5_DROME (+3)	189 kDa	0.964286		1	0	1	1			0	0.928571	6	8	14	0	1	1
			2			sp|Q9V468|Y9776_DROME Zinc finger matrin-type protein CG9776 OS=Drosophila melanogaster GN=CG9776 PE=1 SV=1	sp|Q9V468|Y9776_DROMEZinc finger matrin-type protein CG9776 OS=Drosophila melanogaster GN=CG9776 PE=1 SV=1	?	0.95		0.9	4	6	10	1	0	1	1		1	1			0
			2			sp|Q9VJ87|CWC22_DROME Pre-mRNA-splicing factor CWC22 homolog OS=Drosophila melanogaster GN=ncm PE=1 SV=3	sp|Q9VJ87|CWC22_DROMEPre-mRNA-splicing factor CWC22 homolog OS=Drosophila melanogaster GN=ncm PE=1 SV=3	?	0.9375		0.875	8	8	16	1	1	2	1	2	2	4			0
			2			Drosha OS=Drosophila melanogaster GN=drosha PE=2 SV=1	Q7KNF1_DROME	153 kDa	0.933333		0.866667	8	7	15	1	1	2	1	1	2	3			0
			2			Pasilla, isoform Q OS=Drosophila melanogaster GN=ps PE=1 SV=1	A0A0B4KFY5_DROME	54 kDa	0.928571		0.857143	5	2	7	1	0	1	1		1	1			0
			2			H/ACA ribonucleoprotein complex subunit 4 OS=Drosophila melanogaster GN=Nop60B PE=1 SV=1	sp|O44081|DKC1_DROME	57 kDa	0.925134									0.909091	4	7	11	0	1	1	0.941176	17	17	34	1	1	2
			2			Arrest, isoform B OS=Drosophila melanogaster GN=bru1 PE=2 SV=1	Q8IP90_DROME	88 kDa	0.916667									1	2	3	5	0		0	0.833333	3	3	6	0	1	1
			2			Isoform D of Dual 3',5'-cyclic-AMP and -GMP phosphodiesterase 11 OS=Drosophila melanogaster GN=Pde11	sp|Q9VJ79-2|PDE11_DROME (+2)	171 kDa	0.903171									0.947368	13	6	19	0	1	1	0.858974	42	36	78	7	4	11
			2			Uracil-DNA degrading factor, isoform B OS=Drosophila melanogaster GN=Ude PE=1 SV=1	Q7KS11_DROME	36 kDa	0.895349									1	4	2	6			0	0.790698	23	20	43	5	4	9
			2			Mediator of RNA polymerase II transcription subunit 4 OS=Drosophila melanogaster GN=MED4 PE=1 SV=1	MED4_DROME	28 kDa	0.875		0.75	8	4	12	2	1	3	1	1	1	2			0
			2			Adenosylhomocysteinase OS=Drosophila melanogaster GN=AhcyL1 PE=1 SV=1	Q9VZX9_DROME	57 kDa	0.87037									1	9	11	20			0	0.740741	15	12	27	4	3	7
			2			Protein SHQ1 homolog OS=Drosophila melanogaster GN=CG10055 PE=2 SV=1	SHQ1_DROME	69 kDa	0.866667		0.733333	6	9	15	3	1	4	1	1	1	2			0
			2			LP09908p OS=Drosophila melanogaster GN=CG11095 PE=1 SV=1	Q9VY79_DROME	32 kDa	0.851648									0.857143	5	9	14	1	1	2	0.846154	7	6	13	0	2	2
			2			sp|Q9VSS2|SRP68_DROME Signal recognition particle subunit SRP68 OS=Drosophila melanogaster GN=Srp68 PE=2 SV=1	sp|Q9VSS2|SRP68_DROMESignal recognition particle subunit SRP68 OS=Drosophila melanogaster GN=Srp68 PE=2 SV=1	?	0.838442									0.814815	13	14	27	3	2	5	0.862069	14	15	29	2	2	4
			2			LD23870p OS=Drosophila melanogaster GN=RnpS1 PE=1 SV=2	Q9VHC0_DROME	42 kDa	0.833333		0.666667	3	3	6	1	1	2	1	1	1	2	0		0
			2			Tequila, isoform D OS=Drosophila melanogaster GN=teq PE=1 SV=1	Q8IQB8_DROME (+1)	160 kDa	0.806397									0.703704	12	15	27	4	4	8	0.909091	11	11	22	1	1	2
			2			AT22044p1 OS=Drosophila melanogaster GN=Orc3 PE=1 SV=1	Q7K2L1_DROME	82 kDa	0.80303		0.606061	16	17	33	5	8	13	1	2	4	6			0
			2			Sodium/potassium-transporting ATPase subunit alpha OS=Drosophila melanogaster GN=Atpalpha PE=1 SV=1	E1JIR4_DROME (+6)	111 kDa	0.8		1	1	0	1			0	0.6	2	3	5	1	1	2
			2			LD21888p OS=Drosophila melanogaster GN=Ube3a PE=1 SV=1	Q9VTH1_DROME	108 kDa	0.794643		0.714286	4	3	7	0	2	2								0.875	4	4	8	1	0	1
			2			sp|P40796|LA_DROME La protein homolog OS=Drosophila melanogaster GN=La PE=1 SV=2	sp|P40796|LA_DROME Laprotein homolog OS=Drosophila melanogaster GN=La PE=1 SV=2	?	0.789474									1	1		1			0	0.578947	18	20	38	8	8	16
			2			Protein virilizer OS=Drosophila melanogaster GN=vir PE=1 SV=1	VIR_DROME	209 kDa	0.785									0.75	15	13	28	3	4	7	0.82	23	27	50	5	4	9
			2			Meiotic P26, isoform C OS=Drosophila melanogaster GN=mei-P26 PE=4 SV=1	M9PH32_DROME (+1)	131 kDa	0.772727									0.545455	2	9	11	2	3	5	1	11	11	22		0	0
			2			BcDNA.GH11110 OS=Drosophila melanogaster GN=nito PE=1 SV=1	Q7KMJ6_DROME	89 kDa	0.769663									0.539326	42	47	89	21	20	41	1	6	5	11			0
			2			Dihydrolipoamide acetyltransferase component of pyruvate dehydrogenase complex OS=Drosophila melanogaster GN=CG5599 PE=1 SV=1	Q9VXY3_DROME	50 kDa	0.76087		0.521739	10	13	23	5	6	11	1		1	1			0
			2			Twenty-four, isoform F OS=Drosophila melanogaster GN=tyf PE=1 SV=2	E1JJD6_DROME (+1)	174 kDa	0.757576									0.515152	13	20	33	8	8	16	1	12	11	23		0	0
			2			Uncharacterized protein, isoform B OS=Drosophila melanogaster GN=CG15894 PE=1 SV=1	A8JUZ7_DROME (+3)	170 kDa	0.75									0.5	3	1	4	1	1	2	1	5	4	9			0
			2			CG9425, isoform B OS=Drosophila melanogaster GN=Dmel\CG9425 PE=1 SV=2	Q9VUH9_DROME	230 kDa	0.733333		0.466667	4	11	15	5	3	8								1	15	11	26			0
			2			Cyclin Y, isoform A OS=Drosophila melanogaster GN=CycY PE=1 SV=1	Q9VKF0_DROME	45 kDa	0.7325									0.625	4	4	8	1	2	3	0.84	16	9	25	3	1	4
			2			Eukaryotic translation initiation factor 5 OS=Drosophila melanogaster GN=eIF5 PE=1 SV=1	IF5_DROME	52 kDa	0.728261									1	2	2	4			0	0.456522	25	21	46	13	12	25
			2			Barentsz, isoform D OS=Drosophila melanogaster GN=btz PE=1 SV=1	A0A0B4KH64_DROME (+2)	89 kDa	0.727273		0.454545	5	6	11	3	3	6								1	4	4	8			0
			2			AT02348p OS=Drosophila melanogaster GN=UQCR-C2 PE=1 SV=1	Q9VV75_DROME	45 kDa	0.716667		0.5	6	6	12	3	3	6								0.933333	7	8	15	0	1	1
			2			CG9123 OS=Drosophila melanogaster GN=CG9123-RA PE=2 SV=1	Q9VXW4_DROME	49 kDa	0.709677		0.419355	17	14	31	10	8	18								1	2	4	6			0
			2			Bacchus OS=Drosophila melanogaster GN=Bacc PE=2 SV=1	BACC_DROME	15 kDa	0.708333									0.916667	7	5	12	0	1	1	0.5	5	5	10	3	2	5
			2			EG:132E8.1 protein OS=Drosophila melanogaster GN=ssx PE=1 SV=1	O76876_DROME (+1)	53 kDa	0.7		0.4	3	2	5	2	1	3								1	4	4	8			0
			2			Chorion protein S38 OS=Drosophila melanogaster GN=Cp38 PE=2 SV=1	CH38_DROME	30 kDa	0.7									0.6	7	8	15	3	3	6	0.8	6	4	10	1	1	2
			2			6-phosphofructo 2-kinase/fructose 2,6-bisphosphatase long form OS=Drosophila melanogaster GN=Pfrx PE=1 SV=2	Q9VWH7_DROME (+1)	79 kDa	0.699134									0.428571	2	5	7	2	2	4	0.969697	18	15	33	1		1
			2			Condensin complex subunit 1 OS=Drosophila melanogaster GN=Cap-D2 PE=1 SV=1	Q9VAJ1_DROME	158 kDa	0.69582		0.421053	29	28	57	18	15	33								0.970588	19	15	34	1		1
			2			LD40944p OS=Drosophila melanogaster GN=CG12391 PE=1 SV=1	Q7K4G8_DROME	66 kDa	0.693548		0.387097	17	14	31	10	9	19	1	1	1	2		0	0
			2			CG8929, isoform A OS=Drosophila melanogaster GN=CG8929 PE=1 SV=1	Q960E4_DROME	68 kDa	0.692308		0.384615	5	8	13	3	5	8	1	1	2	3			0
			2			Splicing factor 3A subunit 3 OS=Drosophila melanogaster GN=noi PE=1 SV=1	NOI_DROME	58 kDa	0.688889									0.377778	22	23	45	14	14	28	1	8	5	13	0	0	0
			2			LD29830p OS=Drosophila melanogaster GN=Srp54 PE=1 SV=1	Q9VL71_DROME	58 kDa	0.6875		0.375	15	9	24	8	7	15	1	1	1	2			0
			2			LD47455p OS=Drosophila melanogaster GN=Sf3a2 PE=1 SV=1	Q9VU15_DROME	30 kDa	0.684211									0.368421	11	8	19	6	6	12	1	4	3	7			0
			2			GH14572p OS=Drosophila melanogaster GN=Gbp2 PE=1 SV=1	Q7K533_DROME	49 kDa	0.677839									0.588235	7	10	17	3	4	7	0.767442	21	22	43	5	5	10
			2			Elongin C, isoform A OS=Drosophila melanogaster GN=EloC PE=1 SV=1	Q7JWD6_DROME	13 kDa	0.675824									0.428571	3	4	7	2	2	4	0.923077	6	7	13	1	0	1
			2			Antimeros, isoform A OS=Drosophila melanogaster GN=atms PE=1 SV=1	Q9VN55_DROME	61 kDa	0.666667		0.333333	23	28	51	16	18	34	1	5	4	9			0
			2			Cuticular protein 72Ea OS=Drosophila melanogaster GN=Cpr72Ea PE=1 SV=1	Q9VV44_DROME	37 kDa	0.666118									0.4375	8	8	16	5	4	9	0.894737	9	10	19	1	1	2
			2			Cluster of GH06739p OS=Drosophila melanogaster GN=tn PE=1 SV=1 (Q7JUV6_DROME)	Q7JUV6_DROME [2]	146 kDa	0.660577		0.446154	33	32	65	18	18	36	0.875	12	12	24	0	3	3
			2			Cluster of sp|P02828|HSP83_DROME Heat shock protein 83 OS=Drosophila melanogaster GN=Hsp83 PE=1 SV=1 (sp|P02828|HSP83_DROMEHeat shock protein 83 OS=Drosophila melanogaster GN=Hsp83 PE=1 SV=1)	sp|P02828|HSP83_DROMEHeat shock protein 83 OS=Drosophila melanogaster GN=Hsp83 PE=1 SV=1 [2]	?	0.659091		0.318182	11	11	22	8	7	15								1	6	7	13	0		0
			2			sp|Q9VH07|RUVB1_DROME RuvB-like helicase 1 OS=Drosophila melanogaster GN=pont PE=1 SV=1	sp|Q9VH07|RUVB1_DROMERuvB-like helicase 1 OS=Drosophila melanogaster GN=pont PE=1 SV=1	?	0.65625		0.3125	17	15	32	10	12	22	1	2	1	3	0		0
			2			Hyrax OS=Drosophila melanogaster GN=hyx PE=2 SV=1	Q9VHI1_DROME	61 kDa	0.654762		0.309524	20	22	42	13	16	29	1	1	3	4			0
			2			Protein tramtrack, beta isoform OS=Drosophila melanogaster GN=ttk PE=1 SV=2	TTKB_DROME	69 kDa	0.65		0.3	5	5	10	4	3	7	1	1	2	3			0
			2			No circadian temperature entrainment, isoform D OS=Drosophila melanogaster GN=nocte PE=1 SV=1	M9PE74_DROME (+1)	235 kDa	0.649593									0.365854	19	22	41	14	12	26	0.933333	16	14	30	2	0	2
			2			Condensin complex subunit 2 OS=Drosophila melanogaster GN=barr PE=1 SV=1	Q9VIP9_DROME	83 kDa	0.633333		0.266667	7	8	15	5	6	11								1	2	3	5			0
			2			CG2469, isoform A OS=Drosophila melanogaster GN=Ctr9 PE=1 SV=1	Q7K0X3_DROME	130 kDa	0.627551		0.255102	50	48	98	32	41	73	1	4	8	12			0
			2			Chromatin accessibility complex 16kD protein, isoform A OS=Drosophila melanogaster GN=Chrac-16 PE=1 SV=1	Q9V452_DROME	16 kDa	0.627273		0.454545	5	6	11	4	2	6								0.8	7	8	15	2	1	3
			2			Cluster of Cdc2-related kinase OS=Drosophila melanogaster GN=Cdc2rk PE=1 SV=1 (A1Z840_DROME)	A1Z840_DROME [4]	43 kDa	0.625		0.25	4	4	8	2	4	6	1	1	1	2			0
			2			CG6683 OS=Drosophila melanogaster GN=Dmel\CG6683 PE=1 SV=1	Q9VSL0_DROME	22 kDa	0.625									0.5	5	9	14	4	3	7	0.75	6	6	12	2	1	3
			2			Histone H2A.v OS=Drosophila melanogaster GN=His2Av PE=1 SV=2	H2AV_DROME	15 kDa	0.625									0.333333	2	1	3	1	1	2	0.916667	6	6	12	1		1
			2			sp|Q9W420|SPT6H_DROME Transcription elongation factor SPT6 OS=Drosophila melanogaster GN=Spt6 PE=1 SV=1	sp|Q9W420|SPT6H_DROMETranscription elongation factor SPT6 OS=Drosophila melanogaster GN=Spt6 PE=1 SV=1	?	0.618182									0.6	20	20	40	8	8	16	0.636364	4	7	11	2	2	4
			2			Tho2, isoform B OS=Drosophila melanogaster GN=tho2 PE=1 SV=1	E2QCS8_DROME (+2)	189 kDa	0.614286		0.228571	17	18	35	12	15	27	1	1	1	2			0
			2			Phosphatidylinositol 4-phosphate 5-kinase at 59B, isoform F OS=Drosophila melanogaster GN=PIP5K59B PE=1 SV=1	A0A0B4K7E3_DROME (+2)	86 kDa	0.611607									0.535714	15	13	28	6	7	13	0.6875	8	8	16	1	4	5
			2			Serine/threonine-protein phosphatase PP2A OS=Drosophila melanogaster GN=mts PE=2 SV=1	PP2A_DROME	35 kDa	0.607143									0.5	2	4	6	2	1	3	0.714286	8	6	14	2	2	4
			2			60S ribosomal protein L8 OS=Drosophila melanogaster GN=RpL8 PE=1 SV=1	RL8_DROME	28 kDa	0.606061		0.545455	10	12	22	3	7	10								0.666667	3	3	6	1	1	2
			2			sp|Q8T088|WDR55_DROME WD repeat-containing protein 55 homolog OS=Drosophila melanogaster GN=CG14722 PE=2 SV=1	sp|Q8T088|WDR55_DROMEWD repeat-containing protein 55 homolog OS=Drosophila melanogaster GN=CG14722 PE=2 SV=1	?	0.605263		0.210526	29	28	57	21	24	45								1	0	3	3	0		0
			2			mRNA-capping enzyme OS=Drosophila melanogaster GN=mRNA-cap PE=2 SV=1	Q9VY44_DROME	75 kDa	0.603359									0.651163	23	20	43	10	5	15	0.555556	5	4	9	3	1	4
			2			CG6459 protein OS=Drosophila melanogaster GN=P32 PE=1 SV=1	Q7JXC4_DROME	29 kDa	0.598214									0.571429	4	3	7	1	2	3	0.625	8	8	16	5	1	6
			2			Cluster of Mustard, isoform W OS=Drosophila melanogaster GN=mtd PE=1 SV=1 (A0A0B4K6S8_DROME)	A0A0B4K6S8_DROME [3]	128 kDa	0.597321									0.542857	33	37	70	18	14	32	0.651786	61	51	112	20	19	39
			2			CG3909 OS=Drosophila melanogaster GN=CG3909 PE=1 SV=1	Q9XZ19_DROME	36 kDa	0.596774		0.193548	16	15	31	12	13	25	1	4	1	5	0		0
			2			LD23072p OS=Drosophila melanogaster GN=pasha PE=2 SV=1	Q9V9V7_DROME	72 kDa	0.596154		0.192308	12	14	26	9	12	21	1	2	1	3			0
			2			Alcohol dehydrogenase OS=Drosophila melanogaster GN=Adh PE=1 SV=2	ADH_DROME	28 kDa	0.595238		0.333333	3	3	6	3	1	4								0.857143	4	3	7	0	1	1
			2			Isoform B of Putative cysteine proteinase CG12163 OS=Drosophila melanogaster GN=CG12163	sp|Q9VN93-2|CPR1_DROME (+1)	54 kDa	0.593728									0.491803	28	33	61	16	15	31	0.695652	11	12	23	3	4	7
			2			Ubiquitinyl hydrolase 1 OS=Drosophila melanogaster GN=Usp16-45 PE=1 SV=1	Q9W4C3_DROME	121 kDa	0.591954		0.183908	41	46	87	36	35	71								1	9	10	19			0
			2			CG6937 OS=Drosophila melanogaster GN=CG6937 PE=1 SV=1	Q9VCY1_DROME	40 kDa	0.586207		0.172414	14	15	29	14	10	24	1	1	1	2			0
			2			Histone H2B OS=Drosophila melanogaster GN=His2B PE=1 SV=2	H2B_DROME	14 kDa	0.577922									0.428571	3	4	7	2	2	4	0.727273	10	12	22	3	3	6
			2			mRNA cap guanine-N7 methyltransferase OS=Drosophila melanogaster GN=l(2)35Bd PE=1 SV=2	MCES_DROME	49 kDa	0.576923									0.692308	7	6	13	2	2	4	0.461538	4	9	13	4	3	7
			2			Calmodulin-binding protein related to a Rab3 GDP/GTP exchange protein, isoform A OS=Drosophila melanogaster GN=Crag PE=1 SV=3	Q9W3D3_DROME	187 kDa	0.576486									0.387755	47	51	98	31	29	60	0.765217	60	55	115	15	12	27
			2			Maternal gene required for meiosis, isoform H OS=Drosophila melanogaster GN=mamo PE=4 SV=4	Q9VY72_DROME	162 kDa	0.575758									0.333333	2	4	6	1	3	4	0.818182	6	5	11	0	2	2
			2			sp|Q9V3K3|RUVB2_DROME RuvB-like helicase 2 OS=Drosophila melanogaster GN=rept PE=1 SV=1	sp|Q9V3K3|RUVB2_DROMERuvB-like helicase 2 OS=Drosophila melanogaster GN=rept PE=1 SV=1	?	0.575		0.15	10	10	20	8	9	17	1	1	0	1			0
			2			Pre-mRNA-splicing regulator female-lethal(2)D OS=Drosophila melanogaster GN=fl(2)d PE=1 SV=2	sp|Q9Y091|FL2D_DROME	59 kDa	0.573579									0.538462	8	5	13	3	3	6	0.608696	10	13	23	5	4	9
			2			CG8545 OS=Drosophila melanogaster GN=CG8545-RA PE=1 SV=1	A1Z909_DROME	100 kDa	0.572917		0.145833	52	44	96	43	39	82	1	4	5	9			0
			2			Amidophosphoribosyltransferase OS=Drosophila melanogaster GN=Prat2 PE=2 SV=1	Q967S0_DROME (+1)	59 kDa	0.572727		0.6	3	2	5	1	1	2								0.545455	4	7	11	2	3	5
			2			Cluster of Isoform A of Protein kinase DC2 OS=Drosophila melanogaster GN=Pka-C3 (sp|P16912-2|KDC2_DROME)	sp|P16912-2|KDC2_DROME [6]	57 kDa	0.571429		0.142857	4	3	7	3	3	6	1	1	1	2			0
			2			Histone H2A OS=Drosophila melanogaster GN=His2A PE=1 SV=2	H2A_DROME (+1)	13 kDa	0.571429		0.142857	4	3	7	3	3	6	1	4	3	7			0
			2			Histone H4 OS=Drosophila melanogaster GN=His4 PE=1 SV=2	H4_DROME	11 kDa	0.570513									0.307692	5	8	13	5	4	9	0.833333	3	3	6		1	1
			2			CG9143 OS=Drosophila melanogaster GN=CG9143 PE=1 SV=1	Q6NQY9_DROME	92 kDa	0.568182		0.136364	37	29	66	27	30	57	1	8	8	16			0
			2			ATP synthase subunit gamma, mitochondrial OS=Drosophila melanogaster GN=ATPsyngamma PE=2 SV=2	ATPG_DROME	33 kDa	0.566667		0.8	3	2	5	1		1	0.333333	3	3	6	1	3	4
			2			LD24704p OS=Drosophila melanogaster GN=EG:67A9.2 PE=1 SV=1	Q9W526_DROME	62 kDa	0.565217		0.130435	11	12	23	11	9	20	1	1	1	2			0
			2			Calcium-transporting ATPase OS=Drosophila melanogaster GN=SERCA PE=1 SV=1	A0A0B4LGB7_DROME (+2)	109 kDa	0.5625		1	1	1	2			0	0.125	3	5	8	2	5	7
			2			Cluster of Jabba, isoform B OS=Drosophila melanogaster GN=Jabba PE=1 SV=1 (Q7K1Q6_DROME)	Q7K1Q6_DROME [5]	36 kDa	0.551136		0.227273	11	11	22	9	8	17	0.875	4	4	8	1		1
			2			Succinate dehydrogenase [ubiquinone] iron-sulfur subunit, mitochondrial OS=Drosophila melanogaster GN=SdhB PE=2 SV=2	SDHB_DROME	34 kDa	0.55		1		1	1	0	0	0	0.1	6	4	10	6	3	9
			2			Males-absent on the first protein OS=Drosophila melanogaster GN=mof PE=1 SV=1	MOF_DROME	93 kDa	0.549451		0.384615	11	15	26	7	9	16								0.714286	5	2	7	1	1	2
			2			Rab11 interacting protein, isoform D OS=Drosophila melanogaster GN=Rip11 PE=1 SV=1	X2JL40_DROME	91 kDa	0.541667		0.0833333	13	11	24	9	13	22	1	2	3	5			0
			2			sp|Q9V460|SPT5H_DROME Transcription elongation factor SPT5 OS=Drosophila melanogaster GN=Spt5 PE=1 SV=1	sp|Q9V460|SPT5H_DROMETranscription elongation factor SPT5 OS=Drosophila melanogaster GN=Spt5 PE=1 SV=1	?	0.540441		0.0808824	66	70	136	65	60	125	1	2		2			0
			2			sp|Q9W4X7|EI3GA_DROME Eukaryotic translation initiation factor 3 subunit G-A OS=Drosophila melanogaster GN=eIF3ga PE=1 SV=1	sp|Q9W4X7|EI3GA_DROMEEukaryotic translation initiation factor 3 subunit G-A OS=Drosophila melanogaster GN=eIF3ga PE=1 SV=1	?	0.537736		0.0754717	28	25	53	20	29	49	1	6	3	9	0	0	0
			2			60S ribosomal protein L36 OS=Drosophila melanogaster GN=RpL36 PE=1 SV=1	RL36_DROME	14 kDa	0.533333		0.666667	4	2	6	1	1	2	0.4	2	3	5	2	1	3
			2			Isoform C of Acidic leucine-rich nuclear phosphoprotein 32 family member A OS=Drosophila melanogaster GN=Anp32a	AN32A_DROME (+1)	41 kDa	0.530612		0.0612245	25	24	49	25	21	46	1	2		2			0
			2			60S acidic ribosomal protein P1 OS=Drosophila melanogaster GN=RpLP1 PE=1 SV=2	RLA1_DROME	12 kDa	0.526786									0.428571	5	9	14	4	4	8	0.625	4	4	8	1	2	3
			2			Amidophosphoribosyltransferase OS=Drosophila melanogaster GN=Prat PE=1 SV=2	PUR1_DROME	60 kDa	0.525		0.4	10	10	20	6	6	12								0.65	10	10	20	3	4	7
			2			GM16226p OS=Drosophila melanogaster GN=CG10343 PE=1 SV=1	Q9VJ60_DROME	24 kDa	0.52381		0.047619	12	9	21	9	11	20								1	9	11	20	0	0	0
			2			Ferritin OS=Drosophila melanogaster GN=Fer2LCH PE=1 SV=1	A0A0B4KHF0_DROME (+1)	26 kDa	0.517857		0.178571	15	13	28	10	13	23								0.857143	4	3	7	1	0	1
			2			Ribosomal protein S15, isoform B OS=Drosophila melanogaster GN=RpS15 PE=1 SV=1	A1ZAH8_DROME	17 kDa	0.513323									0.344828	15	14	29	11	8	19	0.681818	12	10	22	3	4	7
			2			Maltase B1 OS=Drosophila melanogaster GN=Mal-B1 PE=4 SV=1	Q9VKE6_DROME	67 kDa	0.50817									0.388889	16	20	36	12	10	22	0.627451	23	28	51	9	10	19
			2			sp|P49963|SRP19_DROME Signal recognition particle 19 kDa protein OS=Drosophila melanogaster GN=Srp19 PE=2 SV=2	sp|P49963|SRP19_DROMESignal recognition particle 19 kDa protein OS=Drosophila melanogaster GN=Srp19 PE=2 SV=2	?	0.504329		0.151515	17	16	33	13	15	28	0.857143	3	4	7		1	1
			2			sp|P41043|GSTS1_DROME Glutathione S-transferase S1 OS=Drosophila melanogaster GN=GstS1 PE=1 SV=2	sp|P41043|GSTS1_DROMEGlutathione S-transferase S1 OS=Drosophila melanogaster GN=GstS1 PE=1 SV=2	?	0.5		0.666667	3	3	6	1	1	2	0.333333	1	2	3	1	1	2
			2			Ribosome biogenesis protein BOP1 homolog OS=Drosophila melanogaster GN=CG5033 PE=2 SV=1	BOP1_DROME	90 kDa	0.491667		0.0833333	40	44	84	39	38	77								0.9	3	7	10	1	0	1
			2			6-phosphofructo 2-kinase/fructose 2,6-bisphosphatase long form OS=Drosophila melanogaster GN=Pfrx PE=1 SV=2	Q9VWH7_DROME (+1)	79 kDa	0.490148		0.551724	13	16	29	7	6	13	0.428571	2	5	7	2	2	4
			2			sp|A1ZAX1|EIF3C_DROME Eukaryotic translation initiation factor 3 subunit C OS=Drosophila melanogaster GN=eIF3-S8 PE=1 SV=1	sp|A1ZAX1|EIF3C_DROMEEukaryotic translation initiation factor 3 subunit C OS=Drosophila melanogaster GN=eIF3-S8 PE=1 SV=1	?	0.484903		0.21223	138	140	278	109	110	219	0.757576	65	67	132	17	15	32
			2			Circadian trip, isoform E OS=Drosophila melanogaster GN=ctrip PE=1 SV=1	A0A0B4JCV6_DROME (+8)	314 kDa	0.483333									0.466667	19	26	45	10	14	24	0.5	6	6	12	2	4	6
			2			Gbeta5 OS=Drosophila melanogaster GN=Gbeta5 PE=2 SV=1	Q9W3J1_DROME	39 kDa	0.459816									0.434783	9	14	23	7	6	13	0.484848	17	16	33	10	7	17
			2			Fat body protein 1, isoform D OS=Drosophila melanogaster GN=Fbp1 PE=4 SV=1	M9PFK6_DROME (+2)	119 kDa	0.457143		0.2	7	8	15	6	6	12								0.714286	3	4	7	1	1	2
			2			GH13256p OS=Drosophila melanogaster GN=Thiolase PE=1 SV=1	Q9W1H8_DROME	51 kDa	0.446429		0.142857	7	7	14	6	6	12								0.75	11	9	20	2	3	5
			2			Fusilli, isoform G OS=Drosophila melanogaster GN=fus PE=4 SV=1	E1JH76_DROME	92 kDa	0.445833									0.6	12	13	25	4	6	10	0.291667	12	12	24	7	10	17
			2			Serine/threonine-protein kinase PAK mbt OS=Drosophila melanogaster GN=mbt PE=1 SV=2	PAKM_DROME	70 kDa	0.436508									0.444444	13	14	27	6	9	15	0.428571	2	5	7	2	2	4
			2			Ribosomal protein L6, isoform A OS=Drosophila melanogaster GN=RpL6 PE=1 SV=1	Q9V9W2_DROME (+1)	28 kDa	0.436111		0.65	8	12	20	3	4	7	0.222222	4	5	9	3	4	7
			2			Multiple ankyrin repeats single KH domain, isoform C OS=Drosophila melanogaster GN=mask PE=4 SV=1	A0A0B4K725_DROME (+2)	424 kDa	0.428082		0.356164	37	36	73	25	22	47	0.5	1	1	2	1	0	1
			2			Dihydrolipoamide acetyltransferase component of pyruvate dehydrogenase complex OS=Drosophila melanogaster GN=muc PE=1 SV=1	M9PCA2_DROME (+1)	50 kDa	0.416667		0.333333	3	6	9	5	1	6	0.5	2	2	4	1	1	2
			2			sp|Q9VSA3|ACADM_DROME Probable medium-chain specific acyl-CoA dehydrogenase, mitochondrial OS=Drosophila melanogaster GN=CG12262 PE=2 SV=1	sp|Q9VSA3|ACADM_DROMEProbable medium-chain specific acyl-CoA dehydrogenase, mitochondrial OS=Drosophila melanogaster GN=CG12262 PE=2 SV=1	?	0.416667		0.166667	4	2	6	3	2	5	0.666667	2	1	3	1	0	1
			2			CG1677, isoform A OS=Drosophila melanogaster GN=CG1677-RA PE=1 SV=2	Q9W3R9_DROME (+1)	109 kDa	0.410714		0.571429	1	6	7	2	1	3	0.25	3	1	4	2	1	3
			2			Uncharacterized protein OS=Drosophila melanogaster GN=CG30069 PE=1 SV=1	A1Z9M5_DROME	461 kDa	0.404762									0.380952	11	10	21	7	6	13	0.428571	3	4	7	1	3	4
			2			sp|P29310|1433Z_DROME 14-3-3 protein zeta OS=Drosophila melanogaster GN=14-3-3zeta PE=1 SV=1	sp|P29310|1433Z_DROME14-3-3 protein zeta OS=Drosophila melanogaster GN=14-3-3zeta PE=1 SV=1	?	0.391667		0.25	7	9	16	4	8	12	0.533333	8	7	15	3	4	7
			2			CG9018, isoform A OS=Drosophila melanogaster GN=Dmel\CG9018 PE=1 SV=1	Q9W039_DROME	42 kDa	0.391414									0.227273	10	12	22	9	8	17	0.555556	3	6	9	2	2	4
			2			CG8728 OS=Drosophila melanogaster GN=CG8728-RA PE=1 SV=1	Q7K3W2_DROME	61 kDa	0.386905									0.452381	21	21	42	10	13	23	0.321429	13	15	28	11	8	19
			2			Flightin OS=Drosophila melanogaster GN=fln PE=2 SV=1	FTN_DROME	21 kDa	0.367857		0.45	10	10	20	5	6	11	0.285714	7	7	14	5	5	10
			2			Acinus, isoform A OS=Drosophila melanogaster GN=Acn PE=1 SV=1	Q9VJ12_DROME	84 kDa	0.366667		0.4	7	8	15	5	4	9	0.333333	1	2	3	1	1	2
			2			40S ribosomal protein S13 OS=Drosophila melanogaster GN=RpS13 PE=1 SV=3	RS13_DROME	17 kDa	0.365385									0.230769	13	13	26	11	9	20	0.5	7	7	14	4	3	7
			2			CG4612, isoform A OS=Drosophila melanogaster GN=CG4612 PE=1 SV=1	Q9W158_DROME	34 kDa	0.362319									0.333333	12	9	21	7	7	14	0.391304	12	11	23	8	6	14
			2			sp|Q9VYR0|LS12A_DROME Protein LSM12 homolog A OS=Drosophila melanogaster GN=CG15735 PE=2 SV=2	sp|Q9VYR0|LS12A_DROMEProtein LSM12 homolog A OS=Drosophila melanogaster GN=CG15735 PE=2 SV=2	?	0.354167		0.333333	1	2	3		2	2	0.375	8	8	16	6	4	10
			2			sp|Q9W4K2|Y3556_DROME Uncharacterized protein CG3556 OS=Drosophila melanogaster GN=CG3556 PE=2 SV=1	sp|Q9W4K2|Y3556_DROMEUncharacterized protein CG3556 OS=Drosophila melanogaster GN=CG3556 PE=2 SV=1	?	0.35									0.2	3	7	10	3	5	8	0.5	5	3	8	2	2	4
			2			60S ribosomal protein L28 OS=Drosophila melanogaster GN=RpL28 PE=1 SV=1	RL28_DROME	16 kDa	0.347222		0.25	5	3	8	3	3	6	0.444444	5	4	9	2	3	5
			2			sp|P41092|RL27A_DROME 60S ribosomal protein L27a OS=Drosophila melanogaster GN=RpL27A PE=1 SV=2	sp|P41092|RL27A_DROME60S ribosomal protein L27a OS=Drosophila melanogaster GN=RpL27A PE=1 SV=2	?	0.338596		0.466667	7	8	15	4	4	8	0.210526	10	9	19	8	7	15
			2			sp|Q9VNE9|RL13A_DROME 60S ribosomal protein L13a OS=Drosophila melanogaster GN=RpL13A PE=1 SV=1	sp|Q9VNE9|RL13A_DROME60S ribosomal protein L13a OS=Drosophila melanogaster GN=RpL13A PE=1 SV=1	?	0.328947		0.157895	12	7	19	8	8	16	0.5	0	2	2	0	1	1
			2			Cluster of Coracle, isoform G OS=Drosophila melanogaster GN=cora PE=1 SV=1 (A0A0B4LG23_DROME)	A0A0B4LG23_DROME [3]	184 kDa	0.328873									0.151079	135	143	278	120	116	236	0.506667	118	107	225	57	54	111
			2			Apolipophorins OS=Drosophila melanogaster GN=Rfabg PE=1 SV=2	APLP_DROME	373 kDa	0.327799		0.0967742	15	16	31	11	17	28								0.558824	15	19	34	7	8	15
			2			FI18812p1 OS=Drosophila melanogaster GN=Unr PE=1 SV=1	B7Z0E2_DROME	118 kDa	0.317308									0.134615	23	29	52	22	23	45	0.5	14	10	24	6	6	12
			2			40S ribosomal protein S4 OS=Drosophila melanogaster GN=RpS4 PE=1 SV=2	RS4_DROME	29 kDa	0.31384									0.162162	37	37	74	32	30	62	0.465517	30	28	58	17	14	31
			2			RE25263p OS=Drosophila melanogaster GN=RpL30 PE=1 SV=1	Q9VJ19_DROME	12 kDa	0.3125									0.0625	7	9	16	8	7	15	0.5625	8	8	16	5	2	7
			2			Cluster of Female sterile (1) homeotic, isoform G OS=Drosophila melanogaster GN=fs(1)h PE=1 SV=1 (M9PJC7_DROME)	M9PJC7_DROME [2]	206 kDa	0.311012		0.309524	20	22	42	14	15	29	0.3125	17	15	32	10	12	22
			2			Isoform A of Ataxin-2 homolog OS=Drosophila melanogaster GN=Atx2	sp|Q8SWR8-2|ATX2_DROME (+2)	97 kDa	0.302273									0.15	22	18	40	17	17	34	0.454545	10	12	22	6	6	12
			2			LD07294p OS=Drosophila melanogaster GN=Tap42 PE=1 SV=2	Q9VJZ5_DROME	43 kDa	0.287654									0.266667	28	32	60	21	23	44	0.308642	41	40	81	28	28	56
			2			40S ribosomal protein S3a OS=Drosophila melanogaster GN=RpS3A PE=1 SV=4	sp|P55830|RS3A_DROME	30 kDa	0.282091		0.238095	10	11	21	8	8	16								0.326087	24	22	46	15	16	31
			2			Polyadenylate-binding protein OS=Drosophila melanogaster GN=pAbp PE=1 SV=3	PABP_DROME	70 kDa	0.278036									0.191489	48	46	94	37	39	76	0.364583	49	47	96	31	30	61
			2			60S ribosomal protein L17 OS=Drosophila melanogaster GN=RpL17 PE=1 SV=1	RL17_DROME	22 kDa	0.271429		0.142857	3	4	7	3	3	6	0.4	3	7	10	3	3	6
			2			Isoform A of Probable isocitrate dehydrogenase [NAD] subunit alpha, mitochondrial OS=Drosophila melanogaster GN=l(1)G0156	IDH3A_DROME (+1)	39 kDa	0.268357									0.113636	25	19	44	18	21	39	0.423077	25	27	52	18	12	30
			2			LD30155p OS=Drosophila melanogaster GN=lost PE=1 SV=1	Q9VN21_DROME	60 kDa	0.257335									0.153846	6	7	13	6	5	11	0.360825	49	48	97	34	28	62
			2			Cluster of Isoform C of 1-phosphatidylinositol 4,5-bisphosphate phosphodiesterase classes I and II OS=Drosophila melanogaster GN=Plc21C (sp|P25455-4|PIP1_DROME)	sp|P25455-4|PIP1_DROME [2]	146 kDa	0.256139									0.0897436	37	41	78	36	35	71	0.422535	40	31	71	20	21	41
			2			ATP synthase subunit alpha, mitochondrial OS=Drosophila melanogaster GN=blw PE=1 SV=2	ATPA_DROME	59 kDa	0.254171		0.129032	16	15	31	14	13	27								0.37931	16	13	29	9	9	18
			2			Isoform C of 60S ribosomal protein L32 OS=Drosophila melanogaster GN=RpL32	sp|P04359-2|RL32_DROME (+1)	17 kDa	0.253968		0.222222	5	4	9	3	4	7	0.285714	3	4	7	2	3	5
			2			60S ribosomal protein L7 OS=Drosophila melanogaster GN=RpL7 PE=1 SV=2	RL7_DROME	30 kDa	0.251553		0.217391	10	13	23	9	9	18	0.285714	3	4	7	4	1	5
			2			60S ribosomal protein L10 OS=Drosophila melanogaster GN=RpL10 PE=1 SV=1	RL10_DROME	26 kDa	0.237013		0.428571	8	6	14	4	4	8	0.0454545	11	11	22	11	10	21
			2			Cluster of HDC03337 OS=Drosophila melanogaster GN=CG34051 PE=4 SV=1 (Q6IH48_DROME)	Q6IH48_DROME [2]	26 kDa	0.232143									0.047619	10	11	21	10	10	20	0.416667	12	12	24	8	6	14
			2			eIF2B-gamma OS=Drosophila melanogaster GN=eIF2Bgamma PE=1 SV=1	A1ZA22_DROME	51 kDa	0.191468		0.0972222	37	35	72	33	32	65								0.285714	3	4	7	2	3	5
			2			40S ribosomal protein S18 OS=Drosophila melanogaster GN=RpS18 PE=1 SV=1	RS18_DROME	18 kDa	0.1625		0.125	9	7	16	7	7	14	0.2	7	8	15	7	5	12
			2			CG9784, isoform C OS=Drosophila melanogaster GN=CG9784 PE=1 SV=1	M9PHS8_DROME (+1)	60 kDa	0.150045									0.19403	33	34	67	28	26	54	0.106061	32	34	66	29	30	59
			2			Cluster of Rab3 GDP-GTP exchange factor, isoform E OS=Drosophila melanogaster GN=Rab3-GEF PE=4 SV=2 (A8JUX2_DROME)	A8JUX2_DROME [3]	230 kDa	0.136601		0.155556	21	24	45	17	21	38	0.117647	7	10	17	7	8	15
			2			Vitellogenin-2 OS=Drosophila melanogaster GN=Yp2 PE=1 SV=2	VIT2_DROME	50 kDa	0.135057									0.166667	3	3	6	3	2	5	0.103448	13	16	29	17	9	26
			2			60S ribosomal protein L13 OS=Drosophila melanogaster GN=RpL13 PE=1 SV=1	RL13_DROME	25 kDa	0.121795		0.166667	9	9	18	8	7	15	0.0769231	7	6	13	7	5	12
			2			sp|P41093|RL18A_DROME 60S ribosomal protein L18a OS=Drosophila melanogaster GN=RpL18A PE=1 SV=1	sp|P41093|RL18A_DROME60S ribosomal protein L18a OS=Drosophila melanogaster GN=RpL18A PE=1 SV=1	?	0.112745		0.0588235	9	8	17	8	8	16	0.166667	9	9	18	8	7	15
			2			sp|Q9VCK0|EI3D1_DROME Eukaryotic translation initiation factor 3 subunit D-1 OS=Drosophila melanogaster GN=eIF-3p66 PE=1 SV=1	sp|Q9VCK0|EI3D1_DROMEEukaryotic translation initiation factor 3 subunit D-1 OS=Drosophila melanogaster GN=eIF-3p66 PE=1 SV=1	?	0.0753589		0.0454545	43	45	88	46	38	84								0.105263	10	9	19	8	9	17
			2			Cluster of 40S ribosomal protein S11 OS=Drosophila melanogaster GN=RpS11 PE=1 SV=1 (RS11_DROME)	RS11_DROME [2]	18 kDa	0.0669643									0.0714286	15	13	28	12	14	26	0.0625	8	8	16	7	8	15

## Sheet: e
File 1e: 67 biological triplicate CidB* + CidA enriched Hits (RAW DATA). Data Analysis: 1. Input scaffold data. 2. Rank by replicate enriched. 3. Rank by avg-F-score. 4. Remove hits with technical replicate inconsistency (Red boxes from Table S4). 5. Classify into functional categories.
								Peptide Frequency (F-score) = (peptide in CidB*-Peptide in Control)/Peptide in CidB*)
								10.11.17	10.17.17	11.9.17
								JFB 022	JFB 024	JFB 026
		Function	Yeast Ortholog	Name	Bio View:1311 Proteins in 1223 Clusters<BR>With 270 Filtered Out	Accession Number	Molecular Weight	F-Score	F-Score	F-Score	avg F-score	std.s
		Ribosome stucture/biogenesis/Translation		39S ribosomal	39S ribosomal protein L11, mitochondrial OS=Drosophila melanogaster GN=mRpL11 PE=1 SV=1	RM11_DROME	22 kDa	1	1	1	1	0
		Signal transduction mechanisms		Pkcdelta	Protein kinase C delta, isoform E OS=Drosophila melanogaster GN=Pkcdelta PE=4 SV=3	Q9VYN1_DROME	207 kDa	0.714286	1	1	0.904762	0.164957
		Ribosome stucture/biogenesis/Translation		CG4338	Probable ribosome biogenesis protein CG4338 OS=Drosophila melanogaster GN=CG4338 PE=2 SV=1	Q9VFA0_DROME	30 kDa	0.8	0.857143	0.944444	0.867196	0.0727451
		Motility/Intracellular trafficking/Secretion		AP-3 small chain sigma3	Adaptor protein complex AP-3 small chain sigma3 OS=Drosophila melanogaster GN=or PE=1 SV=2	Q9W1E8_DROME	22 kDa	0.571429	1	1	0.857143	0.247436
		Transcription/Post-transcriptional modification		TfIIFalpha	General transcription factor IIF subunit 1 OS=Drosophila melanogaster GN=TfIIFalpha PE=1 SV=3	T2FA_DROME	64 kDa	0.448276	1	1	0.816092	0.318538
		DNA replication/repair/packaging/Cell division		La-related protein	Isoform A of La-related protein CG11505 OS=Drosophila melanogaster GN=CG11505	Y1505_DROME	161 kDa	1	0.567568	0.833333	0.8003	0.218101
		Ribosome stucture/biogenesis/Translation		Ribosomal L1	sp|Q9VLK2|Y3096_DROME Ribosomal L1 domain-containing protein CG13096 OS=Drosophila melanogaster GN=CG13096 PE=1 SV=1	Y3096_DROME	?	0.427273	0.961538	1	0.79627	0.320139
		Transcription/Post-transcriptional modification		bunched	Isoform Class 2 of Protein bunched, class 2/F/G isoform OS=Drosophila melanogaster GN=bun	BUN2_DROME	125 kDa	1	0.526316	0.833333	0.78655	0.240283
		Cytoskeleton and Cellular Membranes		Pak3	Pak3, isoform D OS=Drosophila melanogaster GN=Pak3 PE=1 SV=1	A0A0B4KGS4_DROME	66 kDa	0.363636	1	0.902439	0.755358	0.34273
		Transcription/Post-transcriptional modification		CG10341	Uncharacterized protein, isoform C OS=Drosophila melanogaster GN=CG10341 PE=1 SV=1	A0A023GQ99_DROME (+1)	62 kDa	0.25	1	1	0.75	0.433013
		Motility/Intracellular trafficking/Secretion		AP-3 complex subunit beta	AP-3 complex subunit beta OS=Drosophila melanogaster GN=rb PE=1 SV=1	Q9W4K1_DROME	127 kDa	0.455285	0.903846	0.858209	0.739113	0.24686
		Function unknown		GH03795	GH03795p OS=Drosophila melanogaster GN=Dmel\CG18178 PE=1 SV=1	Q9VT38_DROME	43 kDa	0.324324	1	0.857143	0.727156	0.3561
		Motility/Intracellular trafficking/Secretion		AP-3 complex subunit delta	Cluster of AP-3 complex subunit delta OS=Drosophila melanogaster GN=g PE=1 SV=4 (AP3D_DROME)	AP3D_DROME	115 kDa	0.421053	0.829787	0.864583	0.705141	0.246642
		Transporters		sesB	Cluster of sp|Q26365-2|ADT_DROME Isoform A of ADP,ATP carrier protein OS=Drosophila melanogaster GN=sesB (sp|Q26365-2|ADT_DROMEIsoform A of ADP,ATP carrier protein OS=Drosophila melanogaster GN=sesB)	ADT_DROME	?	0.933333	0.142857	1	0.692063	0.476793
		Ribosome stucture/biogenesis/Translation		EIF3K	sp|Q9W2D9|EIF3K_DROME Eukaryotic translation initiation factor 3 subunit K OS=Drosophila melanogaster GN=CG10306 PE=2 SV=1	EIF3K_DROME	?	0.0641026	1	1	0.688034	0.540341
		Function unknown		CG12608	LD30439p OS=Drosophila melanogaster GN=CG12608 PE=1 SV=2	Q9VXW3_DROME	49 kDa	0.261905	1	0.8	0.687302	0.381735
		Signal transduction mechanisms		Pitslre	GH16248p OS=Drosophila melanogaster GN=Pitslre PE=1 SV=1	D3PFF6_DROME	89 kDa	0.527778	0.5	1	0.675926	0.281
		Cytoskeleton and Cellular Membranes		sals	Cluster of GH01093p OS=Drosophila melanogaster GN=sals PE=1 SV=1 (Q58CJ5_DROME)	Q58CJ5_DROME	101 kDa	0.305882	0.809524	0.9	0.671802	0.320108
		Transcription/Post-transcriptional modification		Ssb-c31a	RNA polymerase II transcriptional coactivator OS=Drosophila melanogaster GN=Ssb-c31a PE=2 SV=1	TCP4_DROME	12 kDa	0.285714	1	0.714286	0.666667	0.359516
		Extracellular matrix		mfas	MIP15217p OS=Drosophila melanogaster GN=mfas PE=1 SV=1	D3DMM4_DROME	88 kDa	0.224719	0.818182	0.952381	0.665094	0.387234
		Signal transduction mechanisms		trc	sp|Q9NBK5-2|TRC_DROME Isoform A of Serine/threonine-protein kinase tricorner OS=Drosophila melanogaster GN=trc	TRC_DROME	?	1	0.3125	0.65625	0.65625	0.34375
		Function unknown		CG4069	CG4069 OS=Drosophila melanogaster GN=anon-WO0172774.58 PE=1 SV=1	Q9VTZ7_DROME	56 kDa	0.46875	0.793103	0.693878	0.65191	0.166199
		DNA replication/repair/packaging/Cell division		Chrac-14	Chromatin accessibility complex 14kD protein OS=Drosophila melanogaster GN=Chrac-14 PE=1 SV=1	Q9V444_DROME	14 kDa	0.454545	1	0.5	0.651515	0.302651
		Transcription/Post-transcriptional modification		TfIIFbeta	General transcription factor IIF subunit 2 OS=Drosophila melanogaster GN=TfIIFbeta PE=2 SV=2	T2FB_DROME	32 kDa	0.190476	0.75	1	0.646825	0.414507
		DNA replication/repair/packaging/Cell division		Ssrp	sp|Q05344|SSRP1_DROME FACT complex subunit Ssrp1 OS=Drosophila melanogaster GN=Ssrp PE=1 SV=2	SSRP1_DROME	?	0.340659	0.763636	0.835443	0.64658	0.267356
		Ribosome stucture/biogenesis/Translation		Ns4	LD10773p OS=Drosophila melanogaster GN=Ns4 PE=1 SV=1	Q9VIJ9_DROME	67 kDa	0.164179	1	0.772727	0.645635	0.432161
		Ribosome stucture/biogenesis/Translation		CG5642	sp|Q9VTU4|EIF3L_DROME Eukaryotic translation initiation factor 3 subunit L OS=Drosophila melanogaster GN=CG5642 PE=2 SV=1	EIF3L_DROME	?	0.0714286	0.833333	1	0.634921	0.495063
		Motility/Intracellular trafficking/Secretion		Srp54k	Signal recognition particle 54 kDa protein OS=Drosophila melanogaster GN=Srp54k PE=1 SV=1	Q9V3D9_DROME	56 kDa	0.0131579	1	0.888889	0.634016	0.540541
		DNA replication/repair/packaging/Cell division		dre4	Isoform A of FACT complex subunit spt16 OS=Drosophila melanogaster GN=dre4	SPT16_DROME	128 kDa	0.393443	0.710145	0.790698	0.631428	0.21
		Ribosome stucture/biogenesis/Translation		RpL5	60S ribosomal protein L5 OS=Drosophila melanogaster GN=RpL5 PE=1 SV=2	RL5_DROME	34 kDa	0.333333	0.52381	1	0.619048	0.343386
		Ribosome stucture/biogenesis/Translation		RpL21	RE62581p OS=Drosophila melanogaster GN=RpL21 PE=1 SV=1	Q9V9M7_DROME	18 kDa	0.296296	0.55	1	0.615432	0.356386
		DNA replication/repair/packaging/Cell division		Dek	Dek, isoform C OS=Drosophila melanogaster GN=Dek PE=1 SV=1	A1ZAK3_DROME (+2)	72 kDa	0.011236	1	0.821918	0.611051	0.527031
		Transcription/Post-transcriptional modification		ldbr	Lariat debranching enzyme OS=Drosophila melanogaster GN=ldbr PE=2 SV=1	DBR1_DROME	59 kDa	0.0740741	0.833333	0.925	0.610802	0.467075
		Motility/Intracellular trafficking/Secretion		Carmine	Carmine, isoform A OS=Drosophila melanogaster GN=cm PE=1 SV=1	O76928_DROME	47 kDa	0.25	0.846154	0.732143	0.609432	0.316454
		Transcription/Post-transcriptional modification		Rnp4F	sp|Q9W4D2|RNP4F_DROME RNA-binding protein 4F OS=Drosophila melanogaster GN=Rnp4F PE=1 SV=1	RNP4F_DROME	?	0.157895	0.842857	0.808824	0.603192	0.386014
		Signal transduction mechanisms		14-3-3epsilon	Isoform D of 14-3-3 protein epsilon OS=Drosophila melanogaster GN=14-3-3epsilon	1433E_DROME	30 kDa	0.375	0.428571	1	0.60119	0.346416
		Ribosome stucture/biogenesis/Translation		eIF3-S9	sp|Q0E940|EIF3B_DROME Eukaryotic translation initiation factor 3 subunit B OS=Drosophila melanogaster GN=eIF3-S9 PE=1 SV=1	EIF3B_DROME	?	0.0703125	0.784314	0.944444	0.59969	0.465393
		Ribosome stucture/biogenesis/Translation		eIF-3p40	sp|Q9U9Q4|EIF3H_DROME Eukaryotic translation initiation factor 3 subunit H OS=Drosophila melanogaster GN=eIF-3p40 PE=1 SV=2	EIF3H_DROME	?	0.188119	0.7	0.9	0.59604	0.367151
		Protein modification/degradation/Chaperones		FK506-bp1	sp|P54397|FKB39_DROME 39 kDa FK506-binding nuclear protein OS=Drosophila melanogaster GN=FK506-bp1 PE=1 SV=2	FKB39_DROME	?	0.197531	0.588235	1	0.595255	0.401281
		Transcription/Post-transcriptional modification		Ars2	Cluster of Serrate RNA effector molecule homolog OS=Drosophila melanogaster GN=Ars2 PE=1 SV=2 (SRRT_DROME)	SRRT_DROME	107 kDa	0.175	0.868421	0.737864	0.593762	0.368487
		Transcription/Post-transcriptional modification		Rtf1	RNA polymerase-associated protein Rtf1 OS=Drosophila melanogaster GN=Rtf1 PE=1 SV=1	RTF1_DROME	88 kDa	0.15	0.695652	0.931034	0.592229	0.400657
		Signal transduction mechanisms		Shaggy	Cluster of Shaggy, isoform M OS=Drosophila melanogaster GN=sgg PE=1 SV=1 (A8JUV9_DROME)	A8JUV9_DROME	78 kDa	0.517857	0.464286	0.769231	0.583791	0.162814
		Ribosome stucture/biogenesis/Translation		eIF3-S10	sp|Q9VN25|EIF3A_DROME Eukaryotic translation initiation factor 3 subunit A OS=Drosophila melanogaster GN=eIF3-S10 PE=1 SV=1	EIF3A_DROME	?	0.122905	0.688312	0.939394	0.583537	0.418207
		Ribosome stucture/biogenesis/Translation		Trip1	Cluster of sp|O02195|EIF3I_DROME Eukaryotic translation initiation factor 3 subunit I OS=Drosophila melanogaster GN=Trip1 PE=1 SV=1 (sp|O02195|EIF3I_DROMEEukaryotic translation initiation factor 3 subunit I OS=Drosophila melanogaster GN=Trip1 PE=1 SV=1)	EIF3I_DROME	?	0.102804	0.574468	1	0.559091	0.448796
		Protein modification/degradation/Chaperones		CG2025-RA	CG2025 OS=Drosophila melanogaster GN=CG2025-RA PE=1 SV=2	Q9VYT3_DROME	133 kDa	0.180851	0.663366	0.808333	0.55085	0.328525
		Motility/Intracellular trafficking/Secretion		SRP72	Signal recognition particle subunit SRP72 OS=Drosophila melanogaster GN=Srp72 PE=1 SV=1	Q9VDK7_DROME	73 kDa	0.037037	0.730769	0.857143	0.54165	0.441552
		Ribosome stucture/biogenesis/Translation		SLIRP1	GEO13361p1 OS=Drosophila melanogaster GN=SLIRP1 PE=1 SV=1	Q0KHQ1_DROME	10 kDa	0.12	0.714286	0.789474	0.541253	0.366748
		Ribosome stucture/biogenesis/Translation		Tango7	sp|Q7JVI3|EIF3M_DROME Eukaryotic translation initiation factor 3 subunit M OS=Drosophila melanogaster GN=Tango7 PE=2 SV=1	EIF3M_DROME	?	0.0446429	0.682927	0.882353	0.536641	0.437595
		DNA replication/repair/packaging/Cell division		Non2	LD45195p OS=Drosophila melanogaster GN=Non2 PE=1 SV=1	Q9VZY0_DROME	27 kDa	0.15	0.928571	0.407407	0.495326	0.396662
		Transcription/Post-transcriptional modification		B52	Isoform A of Serine-arginine protein 55 OS=Drosophila melanogaster GN=B52	SRR55_DROME	40 kDa	0.0666667	0.454545	0.958333	0.493182	0.447087
		Cellular and Pathogen defense mechanisms		Mical	Molecule interacting with CasL, isoform K OS=Drosophila melanogaster GN=Mical PE=4 SV=1	A0A0B4K703_DROME	526 kDa	0.43956	0.390244	0.607843	0.479216	0.114091
		DNA replication/repair/packaging/Cell division		mil	AT14585p OS=Drosophila melanogaster GN=mil PE=2 SV=2	Q9VAZ1_DROME	33 kDa	0.16129	0.866667	0.375	0.467652	0.361701
		Ribosome stucture/biogenesis/Translation		RpS17	40S ribosomal protein S17 OS=Drosophila melanogaster GN=RpS17 PE=1 SV=2	RS17_DROME	15 kDa	0.220339	0.392857	0.777778	0.463658	0.285384
		Transcription/Post-transcriptional modification		bsf	Bicoid stability factor OS=Drosophila melanogaster GN=bsf PE=1 SV=2	Q9VJ86_DROME	157 kDa	0.15896	0.695652	0.505415	0.453342	0.272109
		Ribosome stucture/biogenesis/Translation		CG8963	CG8963, isoform E OS=Drosophila melanogaster GN=CG8963 PE=1 SV=1	A0A0B4K891_DROME	58 kDa	0.75	0.333333	0.25	0.444444	0.267879
		Transcription/Post-transcriptional modification		Nopp140	Cluster of Nopp140, isoform E OS=Drosophila melanogaster GN=Nopp140 PE=1 SV=1 (M9PFZ1_DROME)	M9PFZ1_DROME	78 kDa	0.466667	0.0769231	0.666667	0.403419	0.299916
		Ribosome stucture/biogenesis/Translation		RpL24	60S ribosomal protein L24 OS=Drosophila melanogaster GN=RpL24 PE=1 SV=1	RL24_DROME	18 kDa	0.0833333	0.5625	0.555556	0.400463	0.274664
		Ribosome stucture/biogenesis/Translation		eIF3-S6	sp|O77410|EIF3E_DROME Eukaryotic translation initiation factor 3 subunit E OS=Drosophila melanogaster GN=eIF3-S6 PE=1 SV=1	EIF3E_DROME	?	0.156522	0.030303	0.909091	0.365305	0.475142
		Ribosome stucture/biogenesis/Translation		RpL12	GEO07602p1 OS=Drosophila melanogaster GN=RpL12 PE=1 SV=1	Q9W1B9_DROME	18 kDa	0.157895	0.125	0.8	0.360965	0.380571
		Ribosome stucture/biogenesis/Translation		eIF3-S5-1	sp|Q9VN50|EI3F1_DROME Eukaryotic translation initiation factor 3 subunit F-1 OS=Drosophila melanogaster GN=eIF3-S5-1 PE=2 SV=1	EI3F1_DROME	?	0.12	0.571429	0.272727	0.321385	0.229614
		Coenzyme metabolism		pr	6-pyruvoyl tetrahydrobiopterin synthase OS=Drosophila melanogaster GN=pr PE=1 SV=1	PTPS_DROME	19 kDa	0.245614	0.3	0.413043	0.319553	0.0854101
		Ribosome stucture/biogenesis/Translation		RpS9	40S ribosomal protein S9 OS=Drosophila melanogaster GN=RpS9 PE=1 SV=2	RS9_DROME	23 kDa	0.128205	0.12	0.692308	0.313504	0.328079
		Ribosome stucture/biogenesis/Translation		RpL23A	FI01658p OS=Drosophila melanogaster GN=RpL23A PE=1 SV=1	Q9W0A8_DROME	29 kDa	0.0689655	0.0769231	0.714286	0.286725	0.3703
		Signal transduction mechanisms		CG11444	GM14292p OS=Drosophila melanogaster GN=CG11444 PE=1 SV=1	Q9W4J4_DROME	23 kDa	0.15	0.277778	0.363636	0.263805	0.107501
		Ribosome stucture/biogenesis/Translation		RpS19a	sp|P39018|RS19A_DROME 40S ribosomal protein S19a OS=Drosophila melanogaster GN=RpS19a PE=1 SV=3	RS19A_DROME	?	0.125	0.28	0.357143	0.254048	0.118227
		Ribosome stucture/biogenesis/Translation		RpS6	40S ribosomal protein S6 OS=Drosophila melanogaster GN=RpS6 PE=1 SV=1	RS6_DROME	28 kDa	0.148148	0.0681818	0.470588	0.228973	0.213031
				Hsc70-4	Cluster of sp|P11147|HSP7D_DROME Heat shock 70 kDa protein cognate 4 OS=Drosophila melanogaster GN=Hsc70-4 PE=1 SV=3 (sp|P11147|HSP7D_DROMEHeat shock 70 kDa protein cognate 4 OS=Drosophila melanogaster GN=Hsc70-4 PE=1 SV=3)	HSP7D_DROME	?	0.0238095	0.151515	0.306931	0.160752	0.141786
Cellular and Pathogen Defense	1
Coenzyme metabolism	1
Cytoskeleton/Cellular Membranes	2
DNA Replication/Repair/ Packaging/Cell Division	7
Extracellular Matrix	1
Motility/Intracellular Trafficking/Secretion	6
Function Unknown	3
Protein Modification/ Degradation/Chaperones	2
Ribosome Stucture/ Biogenesis/ Translation	24
Signal Transduction	6
Transcription/ Post-Transcriptional Modification	12
Transporters	1

## Sheet: f
File 1f: Compiled CidA interactome data (RAW DATA). Data Analysis: 1. Input scaffold data. 2. Rank by biological replicates of enrichment. 3. Rank by avg-Frequency-score (F-score). 83 total enriched proteins with at least 2 biological replicates; 16 with 3 biological replicates. Red boxes indicate where a technical replicate was inconsistent ie. zero pepetides in one technical replicate but >= 1 …
											12.12.17							12.12.17							12.12.17
												CidA			BL21-AI				CidA			BL21-AI				CidA			BL21-AI
												Peptide Spectra			Peptide Spectra				Peptide Spectra			Peptide Spectra				Peptide Spectra			Peptide Spectra
		inconsistency	Replicates	Yeast Ortholog	Drosophila Name	Bio View:1311 Proteins in 1223 Clusters<BR>With 270 Filtered Out	Accession Number	Molecular Weight	avg fscore	std.s	F-score	JFB_030.1	JFB_030.2	SUM	JFB_027.1	JFB_027.2	SUM	F-score	JFB_031.1	JFB_031.2	SUM	JFB_028.1	JFB_028.2	SUM	F-score	JFB_032.1	JFB_032.2	SUM	JFB_029.1	JFB_029.2	SUM
			3			GrpE protein homolog, mitochondrial OS=Drosophila melanogaster GN=Roe1 PE=2 SV=2	GRPE_DROME	24 kDa	0.972222	0.0481125	0.916667	7	5	12	1		1	1	6	7	13			0	1	5	3	8			0
		x	3			Not1, isoform H OS=Drosophila melanogaster GN=Not1 PE=1 SV=1	A0A0B4LEZ3_DROME (+2)	282 kDa	0.77381	0.215275	0.75	2	2	4	1	0	1	1		3	3	0	0	0	0.571429	4	3	7	0	3	3
			3			Isoform A of Neural/ectodermal development factor IMP-L2 OS=Drosophila melanogaster GN=ImpL2	sp|Q09024-2|IMPL2_DROME (+2)	30 kDa	0.5	0.166667	0.5	2	4	6	2	1	3	0.666667	3	3	6	1	1	2	0.333333	6	3	9	4	2	6
			3			LD13895p OS=Drosophila melanogaster GN=velo PE=1 SV=3	Q9VRY4_DROME	203 kDa	0.45	0.180278	0.25	3	1	4	2	1	3	0.6	3	2	5	0	2	2	0.5	4	4	8	3	1	4
			3			Rab3 GDP-GTP exchange factor, isoform I OS=Drosophila melanogaster GN=Rab3-GEF PE=4 SV=1	A0A0S0X7U5_DROME (+4)	227 kDa	0.433333	0.057735	0.4	2	3	5	2	1	3	0.5	3	5	8	3	1	4	0.4	2	3	5	1	2	3
			3			GEO11286p1 OS=Drosophila melanogaster GN=Cpr66Ca PE=2 SV=1	Q5U126_DROME	15 kDa	0.42316	0.329579	0.0909091	5	6	11	4	6	10	0.428571	8	6	14	5	3	8	0.75	1	3	4	1	0	1
			3			PI-3 kinase OS=Drosophila melanogaster GN=Pi3K92E PE=1 SV=1	P91634_DROME	127 kDa	0.357407	0.21055	0.25	4	4	8	2	4	6	0.222222	4	5	9	3	4	7	0.6	5	5	10	1	3	4
			3			Cluster of Uncharacterized protein, isoform A OS=Drosophila melanogaster GN=CG17271 PE=1 SV=2 (Q9VDI5_DROME)	Q9VDI5_DROME [2]	33 kDa	0.296296	0.06415	0.222222	4	5	9	4	3	7	0.333333	7	8	15	6	4	10	0.333333	3	3	6	2	2	4
			3			5-aminolevulinate synthase OS=Drosophila melanogaster GN=Alas PE=2 SV=1	O18680_DROME	59 kDa	0.2901	0.0584321	0.25	12	16	28	10	11	21	0.263158	12	7	19	9	5	14	0.357143	10	4	14	5	4	9
			3			Cluster of Fmr1, isoform G OS=Drosophila melanogaster GN=Fmr1 PE=1 SV=1 (A0A0B4K618_DROME)	A0A0B4K618_DROME [3]	81 kDa	0.287037	0.157951	0.333333	5	10	15	5	5	10	0.111111	5	4	9	3	5	8	0.416667	5	7	12	3	4	7
			3			Isoform Indirect flight muscle of Myosin light chain alkali OS=Drosophila melanogaster GN=Mlc1	sp|P06742-2|MLC1_DROME (+1)	18 kDa	0.271044	0.20887	0.5	3	1	4	1	1	2	0.222222	5	4	9	3	4	7	0.0909091	6	5	11	5	5	10
			3			IP11925p OS=Drosophila melanogaster GN=CG11878 PE=2 SV=1	Q9VBT8_DROME	49 kDa	0.211111	0.207052	0.0833333	6	6	12	5	6	11	0.1	6	4	10	5	4	9	0.45	11	9	20	6	5	11
			3			HL01517p OS=Drosophila melanogaster GN=wmd PE=1 SV=1	Q9W1N4_DROME	36 kDa	0.208333	0.11024	0.125	3	5	8	2	5	7	0.333333	1	2	3	1	1	2	0.166667	3	3	6	3	2	5
			3			sp|Q9VVA0|Y9705_DROME Cold shock domain-containing protein CG9705 OS=Drosophila melanogaster GN=CG9705 PE=1 SV=1	sp|Q9VVA0|Y9705_DROMECold shock domain-containing protein CG9705 OS=Drosophila melanogaster GN=CG9705 PE=1 SV=1	?	0.199145	0.0320598	0.166667	5	7	12	5	5	10	0.230769	5	8	13	5	5	10	0.2	5	5	10	4	4	8
			3			CG6984 OS=Drosophila melanogaster GN=CG6984 PE=1 SV=1	Q7K1C3_DROME	31 kDa	0.0979532	0.0126612	0.0833333	7	5	12	7	4	11	0.105263	9	10	19	10	7	17	0.105263	8	11	19	8	9	17
			3			RH50433p OS=Drosophila melanogaster GN=CG32549-RF PE=1 SV=1	Q7KUW2_DROME (+3)	70 kDa	0.0937833	0.0190204	0.115385	36	42	78	35	34	69	0.0864198	42	39	81	34	40	74	0.0795455	43	45	88	40	41	81
			2			CG9997, isoform A OS=Drosophila melanogaster GN=CG9997 PE=4 SV=1	Q9VAT8_DROME	38 kDa	0.9		0.8	3	2	5	0	1	1	1	1	0	1		0	0
			2			Kinesin heavy chain 73, isoform E OS=Drosophila melanogaster GN=Khc-73 PE=1 SV=1	A0A0B4KFR5_DROME (+4)	219 kDa	0.75									0.5	1	1	2	1	0	1	1	1	1	2	0	0	0
			2			60S acidic ribosomal protein P1 OS=Drosophila melanogaster GN=RpLP1 PE=1 SV=2	RLA1_DROME	12 kDa	0.7		1	3	1	4	0	0	0	0.4	2	3	5	2	1	3
			2			Transcription factor BTF3 OS=Drosophila melanogaster GN=bic PE=1 SV=1	Q7KM15_DROME	18 kDa	0.693182									0.636364	5	6	11	3	1	4	0.75	2	2	4	1	0	1
			2			3-oxoacyl-[acyl-carrier-protein] synthase OS=Drosophila melanogaster GN=CG12170 PE=1 SV=1	Q9VNF5_DROME	46 kDa	0.583333		0.5	1	1	2	0	1	1								0.666667	3	3	6	1	1	2
			2			La-related protein 1 OS=Drosophila melanogaster GN=larp PE=1 SV=5	sp|Q9VAW5|LARP_DROME	178 kDa	0.566667		0.333333	1	2	3	1	1	2	0.8	2	3	5	0	1	1
			2			CG8336, isoform A OS=Drosophila melanogaster GN=Dmel\CG8336 PE=2 SV=1	Q9VT21_DROME	43 kDa	0.527778									0.5	2	2	4	1	1	2	0.555556	3	6	9	2	2	4
			2			Contactin OS=Drosophila melanogaster GN=Cont PE=1 SV=2	CONT_DROME	158 kDa	0.525									0.25	3	1	4	1	2	3	0.8	2	3	5	0	1	1
			2			sp|Q9VF36|ACYP2_DROME Acylphosphatase-2 OS=Drosophila melanogaster GN=Acyp2 PE=1 SV=1	sp|Q9VF36|ACYP2_DROMEAcylphosphatase-2 OS=Drosophila melanogaster GN=Acyp2 PE=1 SV=1	?	0.507143		0.714286	2	5	7	1	1	2	0.3	6	4	10	2	5	7
			2			Cluster of Mushroom-body expressed, isoform G OS=Drosophila melanogaster GN=mub PE=1 SV=1 (A4V2A4_DROME)	A4V2A4_DROME [6]	38 kDa	0.5									0.625	4	4	8	1	2	3	0.375	4	4	8	3	2	5
			2			RE25263p OS=Drosophila melanogaster GN=RpL30 PE=1 SV=1	Q9VJ19_DROME	12 kDa	0.416667									0.5	4	4	8	2	2	4	0.333333	3	3	6	2	2	4
			2			CG4447 OS=Drosophila melanogaster GN=mRRF1 PE=1 SV=1	Q9VSW4_DROME	28 kDa	0.416667		0.5	3	1	4	2	0	2								0.333333	1	2	3	1	1	2
			2			Dystroglycan, isoform D OS=Drosophila melanogaster GN=Dg PE=1 SV=1	A0A0C4DHF6_DROME (+3)	138 kDa	0.388889		0.444444	4	5	9	3	2	5								0.333333	3	3	6	2	2	4
			2			ATP synthase subunit gamma, mitochondrial OS=Drosophila melanogaster GN=ATPsyngamma PE=2 SV=2	ATPG_DROME	33 kDa	0.380952									0.428571	5	2	7	2	2	4	0.333333	5	4	9	3	3	6
			2			sp|P47938|THIO1_DROME Thioredoxin-1 OS=Drosophila melanogaster GN=dhd PE=1 SV=1	sp|P47938|THIO1_DROMEThioredoxin-1 OS=Drosophila melanogaster GN=dhd PE=1 SV=1	?	0.366667									0.4	5	5	10	3	3	6	0.333333	4	5	9	3	3	6
			2			Daydream OS=Drosophila melanogaster GN=Damm PE=2 SV=1	Q7KHI6_DROME	29 kDa	0.35		0.4	4	6	10	2	4	6								0.3	4	6	10	4	3	7
			2			CG3356 OS=Drosophila melanogaster GN=CG3356 PE=1 SV=1	Q9W196_DROME	129 kDa	0.342857									0.285714	3	4	7	2	3	5	0.4	3	2	5	1	2	3
			2			Serine/threonine-protein kinase polo OS=Drosophila melanogaster GN=polo PE=1 SV=2	POLO_DROME	67 kDa	0.335165									0.285714	3	4	7	3	2	5	0.384615	7	6	13	4	4	8
			2			Dorsal-related immunity factor Dif OS=Drosophila melanogaster GN=Dif PE=1 SV=2	DIF_DROME	74 kDa	0.333333									0.5	2	2	4	2	0	2	0.166667	2	4	6	3	2	5
			2			L.2.35Df OS=Drosophila melanogaster GN=Mtr4 PE=1 SV=1	Q9Y134_DROME	119 kDa	0.325		0.4	4	1	5	2	1	3								0.25	2	2	4	2	1	3
			2			Isoform C of NF-kappa-B inhibitor cactus OS=Drosophila melanogaster GN=cact	sp|Q03017-2|CACT_DROME (+1)	52 kDa	0.314286									0.428571	4	3	7	2	2	4	0.2	3	2	5	2	2	4
			2			RE01730p OS=Drosophila melanogaster GN=Swim PE=1 SV=1	Q7JWQ7_DROME	49 kDa	0.310606		0.454545	4	7	11	3	3	6	0.166667	3	3	6	3	2	5
			2			GH21273p OS=Drosophila melanogaster GN=CG11999 PE=1 SV=1	Q9VNA3_DROME	24 kDa	0.296703									0.285714	6	8	14	6	4	10	0.307692	7	6	13	3	6	9
			2			GH17661p OS=Drosophila melanogaster GN=Dmel\CG33056 PE=1 SV=1	Q961L8_DROME	39 kDa	0.282051		0.230769	6	7	13	6	4	10	0.333333	7	5	12	3	5	8
			2			60S acidic ribosomal protein P0 OS=Drosophila melanogaster GN=RpLP0 PE=1 SV=1	RLA0_DROME	34 kDa	0.276786		0.428571	4	3	7	2	2	4	0.125	2	6	8	4	3	7
			2			sp|Q7KQZ4|LOLA3_DROME Longitudinals lacking protein, isoforms A/B/D/L OS=Drosophila melanogaster GN=lola PE=1 SV=1	sp|Q7KQZ4|LOLA3_DROMELongitudinals lacking protein, isoforms A/B/D/L OS=Drosophila melanogaster GN=lola PE=1 SV=1	?	0.266667		0.2	3	2	5	3	1	4	0.333333	4	2	6	1	3	4
			2			Lingerer, isoform I OS=Drosophila melanogaster GN=lig PE=1 SV=1	A0A0B4K6T1_DROME (+7)	131 kDa	0.25									0.166667	3	3	6	4	1	5	0.333333	3	3	6	2	2	4
			2			Isoform A of Triosephosphate isomerase OS=Drosophila melanogaster GN=Tpi	sp|P29613-1|TPIS_DROME (+1)	38 kDa	0.242857		0.2	1	4	5	1	3	4								0.285714	2	5	7	3	2	5
			2			RE01652p OS=Drosophila melanogaster GN=CG12171 PE=1 SV=1	Q9VNF3_DROME	27 kDa	0.229167		0.333333	1	2	3	2		2								0.125	3	5	8	4	3	7
			2			sp|P29310|1433Z_DROME 14-3-3 protein zeta OS=Drosophila melanogaster GN=14-3-3zeta PE=1 SV=1	sp|P29310|1433Z_DROME14-3-3 protein zeta OS=Drosophila melanogaster GN=14-3-3zeta PE=1 SV=1	?	0.225									0.2	6	4	10	3	5	8	0.25	6	6	12	4	5	9
			2			IP09655p OS=Drosophila melanogaster GN=Mdh2 PE=1 SV=1	Q9VEB1_DROME	35 kDa	0.225		0.2	3	2	5	2	2	4								0.25	3	5	8	4	2	6
			2			sp|Q9VAH9|INT11_DROME Integrator complex subunit 11 OS=Drosophila melanogaster GN=IntS11 PE=1 SV=1	sp|Q9VAH9|INT11_DROMEIntegrator complex subunit 11 OS=Drosophila melanogaster GN=IntS11 PE=1 SV=1	?	0.225		0.25	2	2	4	2	1	3								0.2	2	3	5	2	2	4
			2			Uncharacterized protein, isoform B OS=Drosophila melanogaster GN=CG31688 PE=1 SV=1	B7YZX9_DROME (+2)	21 kDa	0.222527		0.230769	6	7	13	5	5	10								0.214286	7	7	14	5	6	11
			2			Immune induced molecule 33, isoform A OS=Drosophila melanogaster GN=IM33 PE=1 SV=1	Q9VQT8_DROME	9 kDa	0.208333		0.25	2	2	4	2	1	3								0.166667	4	2	6	2	3	5
			2			Female-specific independent of transformer OS=Drosophila melanogaster GN=fit PE=1 SV=1	Q9VD66_DROME	14 kDa	0.203947		0.157895	11	8	19	7	9	16	0.25	5	7	12	6	3	9
			2			p21-activated kinase, isoform F OS=Drosophila melanogaster GN=Pak PE=4 SV=2	B7Z0W0_DROME (+1)	90 kDa	0.2		0.3	5	5	10	4	3	7	0.1	4	6	10	4	5	9
			2			CG9331, isoform B OS=Drosophila melanogaster GN=CG9331 PE=1 SV=1	Q7KT11_DROME (+2)	36 kDa	0.195378									0.176471	11	6	17	7	7	14	0.214286	7	7	14	5	6	11
			2			sp|O61305|DDX19_DROME DEAD-box helicase Dbp80 OS=Drosophila melanogaster GN=Dbp80 PE=1 SV=1	sp|O61305|DDX19_DROMEDEAD-box helicase Dbp80 OS=Drosophila melanogaster GN=Dbp80 PE=1 SV=1	?	0.184468		0.22	22	28	50	18	21	39	0.148936	25	22	47	16	24	40
			2			LD29171p OS=Drosophila melanogaster GN=Sec71 PE=1 SV=2	Q9VJW1_DROME	188 kDa	0.183333		0.1	4	6	10	3	6	9								0.266667	6	9	15	4	7	11
			2			Superoxide dismutase OS=Drosophila melanogaster GN=Sod2 PE=3 SV=1	A0A0B4LGQ1_DROME (+1)	25 kDa	0.183333									0.166667	4	2	6	2	3	5	0.2	2	3	5	2	2	4
			2			RH04334p OS=Drosophila melanogaster GN=CG16885 PE=1 SV=1	Q8SZM2_DROME	29 kDa	0.180556		0.111111	5	4	9	4	4	8	0.25	4	4	8	3	3	6
			2			Eb1, isoform A OS=Drosophila melanogaster GN=Eb1 PE=1 SV=1	Q7JZD3_DROME (+1)	33 kDa	0.173109									0.228571	19	16	35	13	14	27	0.117647	19	15	34	15	15	30
			2			GEO11073p1 OS=Drosophila melanogaster GN=Tim13 PE=1 SV=1	Q0E8V7_DROME	10 kDa	0.171795									0.266667	10	5	15	5	6	11	0.0769231	5	8	13	5	7	12
			2			CG5705 OS=Drosophila melanogaster GN=mRF1 PE=2 SV=1	Q9VK20_DROME	45 kDa	0.166667		0.166667	10	8	18	7	8	15								0.166667	10	8	18	7	8	15
			2			Chondrocyte-derived ezrin-like domain containing protein ortholog, isoform F OS=Drosophila melanogaster GN=Cdep PE=1 SV=1	A0A0C4DHA1_DROME (+1)	132 kDa	0.166667		0.166667	4	2	6	1	4	5								0.166667	4	2	6	2	3	5
			2			Density-regulated protein homolog OS=Drosophila melanogaster GN=DENR PE=1 SV=3	DENR_DROME	21 kDa	0.160417		0.133333	5	10	15	6	7	13								0.1875	7	9	16	6	7	13
			2			ATP synthase subunit beta, mitochondrial OS=Drosophila melanogaster GN=ATPsynbeta PE=1 SV=3	ATPB_DROME (+1)	54 kDa	0.146112		0.134328	32	35	67	31	27	58								0.157895	17	21	38	16	16	32
			2			IP20609p (Fragment) OS=Drosophila melanogaster GN=lectin-30A PE=2 SV=1	Q6GV06_DROME	26 kDa	0.14359									0.153846	7	6	13	6	5	11	0.133333	7	8	15	7	6	13
			2			Isoform B of Probable maleylacetoacetate isomerase 2 OS=Drosophila melanogaster GN=GstZ2	sp|Q9VHD2-2|MAAI2_DROME (+2)	25 kDa	0.140909									0.1	10	10	20	7	11	18	0.181818	13	9	22	8	10	18
			2			sp|Q9VXK0|NIPSN_DROME Protein NipSnap OS=Drosophila melanogaster GN=Nipsnap PE=2 SV=2	sp|Q9VXK0|NIPSN_DROMEProtein NipSnap OS=Drosophila melanogaster GN=Nipsnap PE=2 SV=2	?	0.14		0.2	16	19	35	14	14	28	0.08	13	12	25	11	12	23
			2			Muscle-specific protein 20 OS=Drosophila melanogaster GN=Mp20 PE=2 SV=2	MP20_DROME	20 kDa	0.138889		0.111111	4	5	9	4	4	8								0.166667	2	4	6	3	2	5
			2			Arginase OS=Drosophila melanogaster GN=arg PE=1 SV=2	O76895_DROME	39 kDa	0.136818		0.16	22	28	50	19	23	42								0.113636	22	22	44	20	19	39
			2			GH16740p OS=Drosophila melanogaster GN=GstT4 PE=1 SV=1	Q8MRM0_DROME	28 kDa	0.136338		0.0277778	17	19	36	15	20	35	0.244898	23	26	49	18	19	37
			2			GH23568p OS=Drosophila melanogaster GN=parvin PE=1 SV=2	Q9VWD0_DROME	42 kDa	0.132576									0.0833333	11	13	24	11	11	22	0.181818	11	11	22	10	8	18
			2			Dynactin 4, p62 subunit OS=Drosophila melanogaster GN=DCTN4-p62 PE=1 SV=1	Q7K130_DROME	58 kDa	0.126984									0.142857	3	4	7	3	3	6	0.111111	4	5	9	3	5	8
			2			V-type proton ATPase subunit E OS=Drosophila melanogaster GN=Vha26 PE=2 SV=1	VATE_DROME	26 kDa	0.121386		0.0512821	20	19	39	20	17	37								0.191489	23	24	47	17	21	38
			2			Gilgamesh, isoform J OS=Drosophila melanogaster GN=gish PE=1 SV=1	A0A0B4K697_DROME (+7)	58 kDa	0.118056		0.125	5	3	8	4	3	7	0.111111	4	5	9	5	3	8
			2			Cluster of Isoform A of C-terminal-binding protein OS=Drosophila melanogaster GN=CtBP (sp|O46036-2|CTBP_DROME)	sp|O46036-2|CTBP_DROME [3]	42 kDa	0.106863		0.147059	17	17	34	14	15	29	0.0666667	16	14	30	15	13	28
			2			5-formyltetrahydrofolate cyclo-ligase OS=Drosophila melanogaster GN=CG34424 PE=3 SV=1	Q8MLS1_DROME	23 kDa	0.0910973									0.0952381	9	12	21	9	10	19	0.0869565	10	13	23	11	10	21
			2			Cluster of Muscle LIM protein 1 OS=Drosophila melanogaster GN=Mlp60A PE=2 SV=1 (MLP1_DROME)	MLP1_DROME [2]	10 kDa	0.0883871									0.08	14	11	25	14	9	23	0.0967742	15	16	31	15	13	28
			2			ATP synthase subunit alpha, mitochondrial OS=Drosophila melanogaster GN=blw PE=1 SV=2	ATPA_DROME	59 kDa	0.0825826									0.0540541	18	19	37	20	15	35	0.111111	19	17	36	16	16	32
			2			Dynamin related protein 1, isoform A OS=Drosophila melanogaster GN=Drp1 PE=1 SV=1	Q9VQE0_DROME	83 kDa	0.0789936		0.121951	59	64	123	57	51	108	0.036036	54	57	111	53	54	107
			2			Probable cysteine desulfurase, mitochondrial OS=Drosophila melanogaster GN=CG12264 PE=2 SV=1	NFS1_DROME	51 kDa	0.0741758									0.0769231	18	21	39	15	21	36	0.0714286	19	23	42	18	21	39
			2			Jonah 25Bii, isoform A OS=Drosophila melanogaster GN=Jon25Bii PE=1 SV=1	Q9VMX8_DROME	30 kDa	0.0634551		0.0571429	16	19	35	11	22	33	0.0697674	19	24	43	19	21	40
			2			Immune-induced peptides OS=Drosophila melanogaster GN=IMPP PE=1 SV=3	IMPP_DROME	28 kDa	0.0506579									0.075	19	21	40	19	18	37	0.0263158	19	19	38	18	19	37
			2			CG6439, isoform A OS=Drosophila melanogaster GN=CG6439 PE=1 SV=1	Q9VD58_DROME	40 kDa	0.0382395		0.015873	33	30	63	33	29	62								0.0606061	32	34	66	31	31	62
			2			Pyruvate kinase OS=Drosophila melanogaster GN=PyK PE=2 SV=2	sp|O62619|KPYK_DROME	57 kDa	0.017114									0.0176991	54	59	113	54	57	111	0.0165289	58	63	121	57	62	119

## Sheet: g
File 1g: 15 biological triplicate CidA enriched Hits (RAW DATA). Data Analysis: 1. Input scaffold data. 2. Rank by replicate enriched. 3. Rank by avg-F-score. 4. Remove hits with technical replicate inconsistency (Red boxes from Table S4). 5. Classify into functional categories.
								Peptide Frequency (F-score) = (peptide in CidB*-Peptide in Control)/Peptide in CidB*)
								12.12.17	12.12.17	12.12.17
								JFB_030	JFB_031	JFB_032
		Function	Yeast Ortholog	Drosophila Name	Bio View:1311 Proteins in 1223 Clusters<BR>With 270 Filtered Out	Accession Number	Molecular Weight	F-score	F-score	F-score	avg fscore	std.s
		Protein modification/degradation/Chaperones		Roe1	GrpE protein homolog, mitochondrial OS=Drosophila melanogaster GN=Roe1 PE=2 SV=2	GRPE_DROME	24 kDa	0.916667	1	1	0.972222	0.0481125
		Signal transduction mechanisms		ImpL2	Isoform A of Neural/ectodermal development factor IMP-L2 OS=Drosophila melanogaster GN=ImpL2	IMPL2_DROME	30 kDa	0.5	0.666667	0.333333	0.5	0.166667
		Protein modification/degradation/Chaperones		velo	LD13895p OS=Drosophila melanogaster GN=velo PE=1 SV=3	Q9VRY4_DROME	203 kDa	0.25	0.6	0.5	0.45	0.180278
		Signal transduction mechanisms		Rab3-GEF	Rab3 GDP-GTP exchange factor, isoform I OS=Drosophila melanogaster GN=Rab3-GEF PE=4 SV=1	A0A0S0X7U5_DROME	227 kDa	0.4	0.5	0.4	0.433333	0.057735
		Extracellular matrix		Cpr66Ca	GEO11286p1 OS=Drosophila melanogaster GN=Cpr66Ca PE=2 SV=1	Q5U126_DROME	15 kDa	0.0909091	0.428571	0.75	0.42316	0.329579
		Lipid metabolism		Pi3K92E	PI-3 kinase OS=Drosophila melanogaster GN=Pi3K92E PE=1 SV=1	P91634_DROME	127 kDa	0.25	0.222222	0.6	0.357407	0.21055
		Extracellular matrix		CG17271	Cluster of Uncharacterized protein, isoform A OS=Drosophila melanogaster GN=CG17271 PE=1 SV=2 (Q9VDI5_DROME)	Q9VDI5_DROME	33 kDa	0.222222	0.333333	0.333333	0.296296	0.06415
		Coenzyme metabolism		Alas	5-aminolevulinate synthase OS=Drosophila melanogaster GN=Alas PE=2 SV=1	O18680_DROME	59 kDa	0.25	0.263158	0.357143	0.2901	0.0584321
		Ribosome stucture/biogenesis/Translation		Fmr1	Cluster of Fmr1, isoform G OS=Drosophila melanogaster GN=Fmr1 PE=1 SV=1 (A0A0B4K618_DROME)	A0A0B4K618_DROME	81 kDa	0.333333	0.111111	0.416667	0.287037	0.157951
		Cytoskeleton and Cellular Membranes		Mlc1	Isoform Indirect flight muscle of Myosin light chain alkali OS=Drosophila melanogaster GN=Mlc1	MLC1_DROME	18 kDa	0.5	0.222222	0.0909091	0.271044	0.20887
		Function unknown		CG11878	IP11925p OS=Drosophila melanogaster GN=CG11878 PE=2 SV=1	Q9VBT8_DROME	49 kDa	0.0833333	0.1	0.45	0.211111	0.207052
		Function unknown		wmd	HL01517p OS=Drosophila melanogaster GN=wmd PE=1 SV=1	Q9W1N4_DROME	36 kDa	0.125	0.333333	0.166667	0.208333	0.11024
		Protein modification/degradation/Chaperones		CG9705	sp|Q9VVA0|Y9705_DROME Cold shock domain-containing protein CG9705 OS=Drosophila melanogaster GN=CG9705 PE=1 SV=1	Y9705_DROME	?	0.166667	0.230769	0.2	0.199145	0.0320598
		Function unknown		CG6984	CG6984 OS=Drosophila melanogaster GN=CG6984 PE=1 SV=1	Q7K1C3_DROME	31 kDa	0.0833333	0.105263	0.105263	0.0979532	0.0126612
		Nucleotide metabolism/transport		CG32549	RH50433p OS=Drosophila melanogaster GN=CG32549-RF PE=1 SV=1	Q7KUW2_DROME	70 kDa	0.115385	0.0864198	0.0795455	0.0937833	0.0190204
Coenzyme Metabolism	1
Cytoskeleton/Cellular Membranes	1
Extracellular Matrix	2
Function Unknown	3
Lipid Metabolism	1
Nucleotide Metabolism/Transport	1
Protein Modification/Degradation/Chaperones	3
Ribosome Stucture/ Biogenesis/Translation	1
Signal Transduction Mechanisms	2

## Sheet: h
	File 1h: Fly Crossing Hatch-Rate Data:
	cross: m x f	NGT;GFP x WT - 21°C				cross: m x f	NGT;CidA-BwMel x WT - 21°C				cross: m x f	NGT;CidA-BwMel x WT - 22°C				cross: m x f	NGT;CidA-BwMel x WT - 23°C				cross: m x f	NGT;CidA-BwMel x WT - 25°C				cross: m x f	NGT;CidA-BwMel x NGT;SRP1 - 23°C				cross: m x f	NGT;CidA-BwMel x NGT;Kapα1 - 23°C				cross: m x f	NGT;CidA-BwMel x NGT;NGT - 22°C				cross: m x f	NGT;CidA-BwMel x NGT;Hrp1 - 22°C				cross: m x f	NGT;CidA-BwMel x NGT;Kapα1 - 22°C
	strains:	NGT;EC2.1.1M x 189 - 21°C				strains:	NGT;FS13.2 x 189 - 21°C				strains:	NGT;FS13.2 x 189 - 22°C				strains:	NGT;FS13.2 x 189 - 23°C				strains:	NGT;FS13.2 x 189 - 25°C				strains:	NGT;FS13.2 x NGT;HB1 - 23°C				strains:	NGT;FS13.2 x NGT;Kapa1.5 - 23°C				strains:	NGT;FS13.2 x NGT;NGT - 22°C				strains:	NGT;FS13.2 x NGT;Hrp1a- 22°C				strains:	NGT;FS13.2 x NGT;Kapa1.5 - 22°C
	N	total	hatched	hatch-rate		N	total	hatched	hatch-rate		N	total	hatched	hatch-rate		N	total	hatched	hatch-rate		N	total	hatched	hatch-rate		N	total	hatched	hatch-rate		N	total	hatched	hatch-rate		N	total	hatched	hatch-rate		N	total	hatched	hatch-rate		N	total	hatched	hatch-rate
	1	50	44	88		1	67	60	89.5522		1	55	21	38.1818		1	28	6	21.4286		1	43	0	0		1	11	3	27.2727		1	49	15	30.6122		1	21	8	38.0952		1	87	33	37.931		1	65	26	40
	2	36	33	91.6667		2	20	20	100		2	18	7	38.8889		2	15	3	20		2	36	1	2.77778		2	53	13	24.5283		2	54	19	35.1852		2	61	24	39.3443		2	49	11	22.449		2	58	24	41.3793
	3	54	51	94.4444		3	60	50	83.3333		3	57	20	35.0877		3	35	10	28.5714		3	33	0	0		3	38	9	23.6842		3	27	5	18.5185		3	13	3	23.0769		3	119	37	31.0924		3	16	9	56.25
	4	34	33	97.0588		4	65	61	93.8462		4	33	12	36.3636		4	50	12	24		4	43	1	2.32558		4	8	2	25		4	49	10	20.4082		4	18	4	22.2222		4	15	6	40		4	18	4	22.2222
	5	58	58	100		5	50	41	82		5	60	22	36.6667		5	34	10	29.4118		5	62	0	0		5	35	5	14.2857		5	42	12	28.5714		5	50	19	38		5	19	7	36.8421		5	49	6	12.2449
	6	73	71	97.2603		6	55	41	74.5455		6	12	3	25		6	47	11	23.4043		6	42	0	0		6	14	4	28.5714		6	60	17	28.3333		6	10	3	30		6	59	22	37.2881		6	18	8	44.4444
	7	28	27	96.4286		7	48	37	77.0833		7	22	6	27.2727		7	9	2	22.2222		7	15	0	0		7	8	1	12.5		7	33	12	36.3636		7	37	9	24.3243		7	86	29	33.7209		7	28	5	17.8571
	8	30	28	93.3333		8	63	55	87.3016		8	41	15	36.5854		8	74	16	21.6216		8	41	0	0		8	32	13	40.625		8	58	24	41.3793		8	62	30	48.3871		8	80	25	31.25		8	44	13	29.5455
	9	61	58	95.082		9	54	45	83.3333		9	40	12	30		9	32	7	21.875		9	23	0	0		9	35	5	14.2857		9	24	7	29.1667		9	33	13	39.3939		9	90	28	31.1111		9	50	21	42
	10	68	68	100		10	33	26	78.7879		10	61	23	37.7049		10	30	8	26.6667		10	51	0	0		10	37	12	32.4324		10	57	15	26.3158		10	14	4	28.5714		10	86	34	39.5349		10	29	16	55.1724
	11	47	44	93.617		11	67	52	77.6119		11	16	4	25		11	22	6	27.2727		11	17	0	0		11	10	3	30		11	41	9	21.9512		11	30	8	26.6667		11	20	7	35		11	34	18	52.9412
	12	66	53	80.303		12	57	54	94.7368		12	53	18	33.9623		12	43	9	20.9302		12	39	0	0		12	10	4	40		12	19	4	21.0526		12	43	20	46.5116		12	36	10	27.7778		12	30	14	46.6667
	13	21	21	100		13	64	56	87.5		13	14	5	35.7143		13	16	4	25		13	37	1	2.7027		13	11	2	18.1818		13	32	8	25		13	40	14	35		13	84	31	36.9048		13	24	10	41.6667
	14	25	25	100		14	61	46	75.4098		14	43	14	32.5581		14	26	2	7.69231		14	46	1	2.17391		14	18	4	22.2222		14	12	3	25		14	76	30	39.4737		14	82	35	42.6829		14	15	5	33.3333
	15	49	48	97.9592		15	27	24	88.8889		15	46	15	32.6087		15	13	4	30.7692		15	37	0	0		15	5	1	20		15	10	3	30		15	32	10	31.25		15	76	27	35.5263		15	43	13	30.2326
	16	30	27	90		16	68	49	72.0588		16	62	27	43.5484		16	45	5	11.1111		16	43	0	0		16	30	4	13.3333		16	26	8	30.7692		16	35	9	25.7143		16	12	4	33.3333		16	41	19	46.3415
	17	15	15	100		17	68	65	95.5882		17	47	19	40.4255		17	13	2	15.3846		17	55	0	0		17	32	5	15.625		17	29	9	31.0345		17	17	6	35.2941		17	62	23	37.0968		17	55	30	54.5455
	18	60	57	95		18	25	24	96		18	33	10	30.303		18	50	13	26		18	54	1	1.85185		18	6	2	33.3333		18	39	11	28.2051		18	36	14	38.8889		18	42	15	35.7143		18	62	34	54.8387
	19	54	51	94.4444		19	47	38	80.8511		19	28	10	35.7143		19	53	13	24.5283		19	57	1	1.75439		19	8	1	12.5		19	31	10	32.2581		19	23	8	34.7826		19	59	22	37.2881		19	57	30	52.6316
	20	61	56	91.8033		20	56	49	87.5		20	52	14	26.9231		20	51	3	5.88235		20	32	0	0		20	26	4	15.3846		20	26	9	34.6154		20	15	6	40		20	31	16	51.6129		20	72	28	38.8889
	21	30	28	93.3333		21	57	48	84.2105		21	73	27	36.9863		21	8	3	37.5		21	28	0	0		21	23	6	26.087		21	18	5	27.7778		21	10	3	30		21	75	35	46.6667		21	43	17	39.5349
	22	49	45	91.8367		22	34	26	76.4706		22	40	15	37.5		22	49	5	10.2041		22	38	0	0		22	20	5	25		22	19	4	21.0526		22	33	13	39.3939		22	95	34	35.7895		22	40	16	40
	23	30	29	96.6667		23	37	33	89.1892		23	47	18	38.2979		23	67	9	13.4328		23	36	0	0		23	7	2	28.5714		23	40	8	20		23	30	13	43.3333		23	95	20	21.0526		23	22	9	40.9091
	24	58	56	96.5517		24	63	50	79.3651		24	54	20	37.037		24	25	4	16		24	44	0	0		24	52	10	19.2308		24	37	12	32.4324		24	62	29	46.7742		24	92	40	43.4783		24	69	26	37.6812
	25	31	26	83.871		25	60	56	93.3333		25	35	11	31.4286		25	43	3	6.97674		25	40	0	0		25	6	1	16.6667		25	29	7	24.1379		25	24	10	41.6667		25	107	50	46.729		25	56	24	42.8571
	26	45	43	95.5556		26	58	45	77.5862		26	60	23	38.3333		26	40	6	15		26	49	1	2.04082		26	26	6	23.0769		26	34	9	26.4706		26	15	6	40		26	74	30	40.5405		26	42	20	47.619
	27	52	46	88.4615		27	68	57	83.8235		27	44	16	36.3636		27	63	16	25.3968		27	46	0	0		27	16	2	12.5		27	17	2	11.7647		27	37	14	37.8378		27	58	23	39.6552		27	50	29	58
	28	62	60	96.7742		28	57	48	84.2105		28	14	5	35.7143		28	7	2	28.5714		28	32	2	6.25		28	41	9	21.9512		28	30	8	26.6667		28	40	13	32.5		28	77	35	45.4545		28	51	28	54.902
	29	62	58	93.5484		29	66	44	66.6667		29	45	15	33.3333		29	30	8	26.6667		29	34	0	0		29	29	8	27.5862		29	21	2	9.52381		29	53	20	37.7358		29	58	23	39.6552		29	43	23	53.4884
	30	45	44	97.7778		30	34	27	79.4118		30	44	16	36.3636		30	8	1	12.5		30	16	0	0		30	25	6	24		30	38	17	44.7368		30	55	28	50.9091		30	42	15	35.7143		30	55	26	47.2727
	31	53	52	98.1132		31	54	47	87.037		31	14	5	35.7143		31	19	5	26.3158		31	35	0	0		31	62	12	19.3548		31	6	1	16.6667		31	57	20	35.0877		31	110	50	45.4545		31	59	25	42.3729
	32	58	53	91.3793		32	54	41	75.9259		32	11	4	36.3636		32	21	5	23.8095		32	49	2	4.08163		32	11	2	18.1818		32	27	11	40.7407		32	39	15	38.4615		32	70	21	30		32	38	20	52.6316
	33	33	31	93.9394		33	61	56	91.8033		33	21	8	38.0952		33	30	8	26.6667		33	37	0	0		33	31	7	22.5806		33	35	10	28.5714		33	59	16	27.1186		33	56	24	42.8571		33	43	17	39.5349
	34	55	43	78.1818		34	41	39	95.122		34	11	4	36.3636		34	27	6	22.2222		34	44	0	0		34	12	2	16.6667		34	27	11	40.7407		34	24	9	37.5		34	74	27	36.4865		34	38	17	44.7368
	35	57	57	100		35	49	38	77.551		35	38	15	39.4737		35	32	7	21.875		35	51	0	0		35	30	9	30		35	30	6	20		35	40	14	35		35	45	23	51.1111		35	28	16	57.1429
	36	63	61	96.8254		36	62	44	70.9677		36	53	18	33.9623		36	63	16	25.3968		36	27	1	3.7037		36	8	3	37.5		36	17	7	41.1765		36	40	12	30		36	55	24	43.6364		36	49	22	44.898
	37	57	57	100		37	65	55	84.6154		37	58	19	32.7586		37	60	18	30		37	42	1	2.38095		37	17	2	11.7647		37	35	15	42.8571		37	38	14	36.8421		37	79	30	37.9747		37	59	25	42.3729
	38	69	68	98.5507		38	36	31	86.1111		38	16	4	25		38	27	8	29.6296		38	42	1	2.38095		38	7	2	28.5714		38	37	16	43.2432		38	25	8	32		38	54	30	55.5556		38	38	17	44.7368
	39	45	43	95.5556		39	20	15	75		39	18	7	38.8889		39	19	5	26.3158		39	77	3	3.8961		39	6	1	16.6667		39	18	5	27.7778		39	17	6	35.2941		39	57	20	35.0877			sum:	sum:	sum hatch-rate
	40	75	74	98.6667		40	47	40	85.1064		40	62	27	43.5484		40	13	2	15.3846		40	46	2	4.34783		40	26	6	23.0769		40	24	7	29.1667		40	12	3	25		40	58	28	48.2759			1631	710	43.5316
	41	39	37	94.8718		41	51	38	74.5098			sum:	sum:	sum hatch-rate		41	30	8	26.6667		41	30	0	0		41	23	6	26.087		41	35	7	20		41	35	13	37.1429		41	81	33	40.7407
		sum:	sum:	sum hatch-rate		42	41	34	82.9268			1551	554	35.7189		42	43	3	6.97674			sum:	sum:	sum hatch-rate		42	12	2	16.6667		42	35	13	37.1429			sum:	sum:	sum hatch-rate		42	70	21	30
		1988	1879	94.5171		43	54	45	83.3333							43	19	5	26.3158			1649	19	1.15221		43	23	6	26.087		43	18	4	22.2222			1411	521	36.9242		43	79	35	44.3038
						44	30	20	66.6667							44	43	9	20.9302							44	20	5	25		44	35	10	28.5714							44	83	23	27.7108
						45	38	33	86.8421							45	22	6	27.2727							45	5	1	20		45	39	12	30.7692							45	42	15	35.7143
	Total Eggs Counted:		53347				sum:	sum:	sum hatch-rate							46	50	13	26							46	30	4	13.3333		46	32	8	25							46	81	36	44.4444
							2292	1903	83.0279							47	67	9	13.4328							47	26	4	15.3846		47	35	15	42.8571							47	60	24	40
																48	53	13	24.5283								sum:	sum:	sum hatch-rate		48	30	6	20								sum:	sum:	sum hatch-rate
																	sum:	sum:	sum hatch-rate								1021	226	22.1352		49	27	11	40.7407								3121	1191	38.1608
																	1664	349	20.9736												50	29	7	24.1379
																															51	30	8	26.6667
																															52	6	1	16.6667
																																sum:	sum:	sum hatch-rate
																																1608	475	29.5398

## Sheet: i
	File 1i: Primer Database
	PCR analysis Primers
	Name	Target	Sequence (5'-3')	Anneal	Size (kb)	Template	Notes
	JFB 646 F	H3	GGCCGCTCGCAAGAGTG	59.8	0.202	Genomic	H3 primer design 202 bp product. Conserved in Simulans and Melanogaster = 202 bp product
	JFB 647 R	H3	CATAACCGCCGAGCTCTG	58.4	0.202	Genomic	H3 primer design 202 bp product. Conserved in Simulans and Melanogaster = 202 bp product
	AC009 F	VirD4	CTGGTAAAGGTGTTGGTTTTG			Genomic	VirD4 from the Type IV SS Conserved region from wPpe with wRi
	AC010 R	VirD4	GCAGTTGCAGTATCAATCAATG			Genomic	VirD4 from the Type IV SS Conserved region from wPpe with wRi
	Cloning Primers
	Name	Target	Sequence (5'-3')	Anneal	Template	Clone	Notes
	JFB 298 F	NSE3	ACACGGATCCGGAAATTGTGGAGAATGGAAC	57.5	Genomic yeast	EN4 and derivitives	Primers: 1854bp: NSE3 into pGP564
	JFB 299 R	NSE3	TTGGCTCGAGCACAGATAAGAAGAATGAAGTTG	57.6	Genomic yeast	EN4 and derivitives	Primers: 1854bp: NSE3 into pGP564
	JFB 302 F	SRP1	ACACGGATCCCAATTCCAATGCACCGAAGAG	59.5	Genomic yeast	EN1	Primers: 2436bp SRP1 into pGP564
	JFB 303 R	SRP1	TTGGCTCGAGGCCTATGCTATTATCAATGTGC	58.4	Genomic yeast	EN1	Primers: 2436bp SRP1 into pGP564
	JFB 449 F	[Nse3-Rtt103]	AAAAGAGCTCGAAAGCAAGTTGAGTACAGATC	58.4	Genomic yeast	ER7	Primers to clone [Nse3] 891 bp into pGP564 with 5’ SacI, 3’ XhoI; Pair with * JFB 299
	JFB 587 F	CinAwRi	AAAAGGATCCATGGACTACAAAGACGATGACGACAAGATGCCAAAAAAGATGGAGCG	56	Genomic wRi	FJ1	Cloning wRi CinA with FLAG-TAG N terminus into pRS425gal1
	JFB 588 R	CinAwNoRi	AAAACTCGAGCTACTTATTGCGACCAGAAAAAC	59.2	Genomic wRi	FJ1	Cloning wRi CinA with FLAG-TAG N terminus into pRS425gal1
	JFB 606 F	CidAwHa	AAAAGGATCCATGGACTACAAAGACGATGACGACAAGATGCCAACACAGAAAGAGCTTC	60	Genomic wHa	FW3	Cloning wHa CidA with FLAG-TAG N terminus into pRS425gal1
	JFB 607 R	CidAwHa	AAAACTCGAGTTACTTATTACCACTAAGCGTAAAG	59.2	Genomic wHa	FW3	Cloning wHa CidA with FLAG-TAG N terminus into pRS425gal1
	JFB 608 F	CidBwHa	AAAAGGATCCATGGACTACAAAGACGATGACGACAAGATGAGTAATGGTGATGGACTTAT	57.4	Genomic wHa	FX3, FZ104	Cloning wHa CidB with FLAG-TAG N terminus into pRS416gal1; amHI 57.4 *hotstart
	JFB 609 R	CidBwHa	AAAACTCGAGCTACCTACCGCCTTTACC	56.4	Genomic wHa	FX3, FZ104	Cloning wHa CidB with FLAG-TAG N terminus into pRS416gal1; – XhoI 56.4
	JFB 653 F	CinAwNo	AAAAGGATCCATGGACTACAAAGACGATGACGACAAGATGCCGAAGTCCAAGACC	56.3	FN1 (synthetic construct)	GA3	Cloning wNo CinA synthetic with FLAG-TAG N terminus into pRS425gal1
	JFB 654 R	CinAwNo	TTTCAAGCTTTTACTTATTCACCACGGCGGC	58	FN1 (synthetic construct)	GA3	Cloning wNo CinA synthetic with FLAG-TAG N terminus into pRS425gal1
	JFB 700 F	CndAwStr	AAAAGGATCCATGGACTACAAAGACGATGACGACAAGATGGATTACGAAGATGTACAAAAG	58.3	Genomic wStr	GK2	Primers to clone wStr CindA 5’BamHI 3’XhoI with FLAG-TAG N-term pRS425gal1
	JFB 701 R	CndAwStr	AAAACTCGAGCTACACTTTGCTCCTAGCATC	59	Genomic wStr	GK2	Primers to clone wStr CindA 5’BamHI 3’XhoI with FLAG-TAG N-term pRS425gal1
	JFB 702 F	CndBwStr	AAAAGGATCCATGGACTACAAAGACGATGACGACAAGATGGTTGATAACAATCAACAACAAG	59.2	Genomic wStr	GL1	Primers to clone wStr CindB 5’BamHI 3’XhoI with FLAG-TAG N-term pRS416gal1
	JFB 703 R	CndBwStr	TTTTCTCGAGTTATTTTGGTTGTTGTGTTTCAGC	55	Genomic wStr	GL1	Primers to clone wStr CindB 5’BamHI 3’XhoI with FLAG-TAG N-term pRS416gal1
	JFB 866 F	HRP1	TTTTGGATCCCCTCCCTACGAGCAGCG		Genomic yeast	Hrp1	Primers to clone Hrp1 2337 bp product Use bamHI and XhoI 506 bp 5’;226 bp 3’
	JFB 867 R	HRP1	TTTTCTCGAGCTTGCGCACAATAACATTAAG		Genomic yeast	Hrp1	Primers to clone Hrp1 2337 bp product Use bamHI and XhoI 506 bp 5’;226 bp 3’
	JFB 876 F	RTT103	AAAACTCGAGGGTTCTCATCAATATACTTGAAAAC		Genomic yeast	Rtt1	Primers to clone Rtt103 1863 bp product 486 bp 5’; 147 bp 3’
	JFB 877 R	RTT103	GGGGCTGCAGGGTGCGCATCTTTTTTGTCG		Genomic yeast	Rtt1	Primers to clone Rtt103 1863 bp product 486 bp 5’; 147 bp 3’
	Quickchange Primers
	Name	Target	Sequence (5'-3')	Anneal	Template	Clone	Notes
	JFB 777 F	CidBwHa	GGTTGGAATGCGGGTTTATGGGCATTAGAAAATGCTAGTG	55	FZ104	FZ1D	wHa catalytic mutant C1007A:
	JFB 778 R	CidBwHa	CATAAACCCGCATTCCAACCATCTGTTTGCTGACTAACAG	55	FZ104	FZ1D	wHa catalytic mutant C1007A:
	JFB 842 F	SRP1	CAAATTTTGTTTAGAGAACACCGCCCTCCAATTGATGTCG	55	Srp22	SF3	Mutatants: Srp1-31 (S116F)
	JFB 843 R	SRP1	GTTCTCTAAACAAAATTTGTCTAAACTTAACAGTAGCAC	55	Srp22	SF3	Mutatants: Srp1-31 (S116F)
	JFB 844 F	SRP1	CAACCTAAAATGTTACAATTGGAGGCTGCTTGGGCTTTG	55	Srp22	EK1	Mutants: Srp1-49 (E145K)
	JFB 845 R	SRP1	GTAACATTTTAGGTTGGTTTTCACGCATAAATTCTAC	55	Srp22	EK1	Mutants: Srp1-49 (E145K)
	SLIM Primers
	Name	Target	Sequence (5'-3')	Anneal	Template	Clone	Notes
	JFB 720 F	CP103	GACTACAAAGACGATGACGACAAGATGAGTAATGGTGATGGAC	55	CP103	F108	Primers for inserting an N-terminal FLAG into Cp103 0283/cidB replacing His6
	JFB 721 F’	CP103	ATGAGTAATGGTGATGGAC	55	CP103	F108	Primers for inserting an N-terminal FLAG into Cp103 0283/cidB replacing His7
	JFB 722 R	CP103	CTTGTCGTCATCGTCTTTGTAGTCCATGGATCCACTAGTTCTAG	55	CP103	F108	Primers for inserting an N-terminal FLAG into Cp103 0283/cidB replacing His8
	JFB 723 R’	CP103	CATGGATCCACTAGTTCTAG	55	CP103	F108	Primers for inserting an N-terminal FLAG into Cp103 0283/cidB replacing His9
	JFB 761 F	CP103	TACCCATACGATGTTCCAGATTACGCTATGAGTAATGGTGATGGAC	55	CP103	H101	Primers for inserting an N-terminal HA into Cp103 0283/cidB replacing His6
	JFB 762 F'	CP103	ATGAGTAATGGTGATGGAC	55	CP103	H101	Primers for inserting an N-terminal HA into Cp103 0283/cidB replacing His6
	JFB 763 R	CP103	AGCGTAATCTGGAACATCGTATGGGTACATGGATCCACTAGTTCTAG	55	CP103	H101	Primers for inserting an N-terminal HA into Cp103 0283/cidB replacing His6
	JFB 764 R’	CP103	CATGGATCCACTAGTTCTAG	55	CP103	H101	Primers for inserting an N-terminal HA into Cp103 0283/cidB replacing His6
	JFB 769 F	CP103	ATGAGTAATGGTGATGGACTTATTAGGAGTTTGGTGGATG	55	CP103	N102	Primers for inserting no tag into Cp103 0283/cidB replacing His6
	JFB 770 F’	CP103	CTTATTAGGAGTTTGGTGGATG	55	CP103	N102	Primers for inserting no tag into Cp103 0283/cidB replacing His6
	JFB 771 R	CP103	TCCATCACCATTACTCATGGATCCACTAGTTCTAGAATC	55	CP103	N102	Primers for inserting no tag into Cp103 0283/cidB replacing His6
	JFB 772 R’	CP103	GGATCCACTAGTTCTAGAATC	55	CP103	N102	Primers for inserting no tag into Cp103 0283/cidB replacing His6
	JFB 832 F	EN41 (NSE3 derivitive)	TACTCAACCATCATACTCGAGGGGGGGCCC	55	EN41	EN4A1	Primers for SLIM out RTT103 from ER7
	JFB 833 F’	EN41 (NSE3 derivitive)	CTCGAGGGGGGGCCC	55	EN41	EN4A1	Primers for SLIM out RTT103 from ER7
	JFB 834 R	EN41 (NSE3 derivitive)	TATGATGGTTGAGTAAAAAGAAAACAAGGAGATAACTTATAC	55	EN41	EN4A1	Primers for SLIM out RTT103 from ER7
	JFB 835 R’	EN41 (NSE3 derivitive)	AAAAGAAAACAAGGAGATAACTTATAC	55	EN41	EN4A1	Primers for SLIM out RTT103 from ER7
	JFB 838 F	SRP1	ATGGACTACAAAGACGATGACGACAAGATGGATAATGGTACAGATTCTTC	55	Srp22	SRP221	Insertion of N-terminal Flag Tag into Srp1 for mutagenesis
	JFB 839 F'	SRP1	ATGGATAATGGTACAGATTCTTC	55	Srp22	SRP221	Insertion of N-terminal Flag Tag into Srp1 for mutagenesis
	JFB 840 R	SRP1	CTTGTCGTCATCGTCTTTGTAGTCCATATTTATTAATTTGTTATGTAGAAGGG	55	Srp22	SRP221	Insertion of N-terminal Flag Tag into Srp1 for mutagenesis
	JFB 841 R'	SRP1	ATTTATTAATTTGTTATGTAGAAGGG	55	Srp22	SRP221	Insertion of N-terminal Flag Tag into Srp1 for mutagenesis
	Sequencing Primers
	Name	Target	Sequence (5'-3')
	pYesF	pyes2	CTAATACTTTCAACATTTTCGG
	pYesR	pyes2	CTTCCTTTTCGGTTAGAGC
	JFB 022 F	CidBwPip	CAAGGTTTAATGGAAGAAGACC
	SUM3 F	CidBwPip	GAGATTTCTTGCTTCACCATC
	SUM4 F	CidBwPip	CTTGCTGGTGATCTTGTAC
	SUM5 F	CidBwPip	GGACAACAGCAAAATGATGC
	SUM7 F	CidBwPip	GATTCACTTGGTCCAGATAG
	JFB 628 F	CidAwHa	CTCTTTCTCGTCCTCAATCTG
	JFB 629 F	CidBwHa	CAGCTCAGACAACTTGATAG
	JFB 630 F	CidBwHa	GCTTCAACATCTTCCTGGTG
	JFB 631 F	CidBwHa	CATGGTACATTTTATGCTAGTG
	JFB 632 F	CidBwHa	ACTAGAGCACAGGTAATAGAAAC
	JFB 633 F	CidBwHa	CGAGTTCTAAACGAAAATCCTG
	JFB 583 F	CinAwRi	GAGTAGAATATTTTTATAGCCTTC
	JFB 146 R	pGP564 *library plasmid	TAAGTTGGGTAACGCCAGGG
	JFB 147 F	pGP564 *library plasmid	GAGCGGATAACAATTTCACACAGG
	JFB 567 F	pBSK	CGCCAGCTGGCGAAAGGGGG
	JFB 568 R	pBSK	GGCACCCCAGGCTTTACACTTTATGC
	JFB 310	NSE3	ACACGGATCCGCATGAGTTCTATAGATAATGAC
	JFB 854 - Cmh785	SRP1	CATCGTTATTTTATAGAACGATC	*designed by Dr. Hickey
	JFB 855r - Cmh786	SRP1	AAATAATGGATCAGATAATGAAG	*designed by Dr. Hickey
	JFB 856 - Cmh787	SRP1	GCTGTACCTCTTTTCATTCAAC	*designed by Dr. Hickey
	JFB 857r - Cmh788	SRP1	TGGCTCCATGGCATTACATTG	*designed by Dr. Hickey
	JFB 868 F	SRP1	CAAGAACTACCACAAATGACTC
	JFB 869 F	SRP1	GACACTGAAACTTTAGTTGATG
	JFB 118 F	pUASp-attb	GTCATCAAGCTTAGGCCTC
	JFB 119 R	pUASp-attb	CTATTAACAAGTATGAATGTCAG
	JFB 623	D.m.KapA1 *synthetic construct	CGAGCAGCAGCTGTTCAAG

## Sheet: j
	File 1j: Construct Database *Constructs used in each figure are listed
	Figure 1a Constructs Used
	Name	#	Vector	Insert	Location JB Database	Notes
	vector		pRS416gal1	empty	2.3.5	Ampr, cen, ura3, Gal1 promoter-MCS-cyc1 term. Ref: NAR(94)22:5767; MrthEnz(97)283:313
	FLAG-CidBwPip	F108	pRS416gal1	FLAG-CidBwPip	6.4.3	N-term FLAG; 0283 in CEN pRS416 gal1 ura marked plasmid. Clone made SLIM of cp103 with primers 720, 721, 722, 723. Sequence is perfect; gal1 promoter; cyc terminator.
	FLAG-CidBwHa	FX3	pRS416gal1	FLAG-CidBwHa	5.7.5	(Flag) wHa CidB. Fully sequenced. There is a charge switch allele/polymorphism in all reads; I later confirmed that fixing the polymorphism to the reference sequence did not alter/change the experimental phenotype in yeast. The subsequent descendent clone created was FZ104. Made on 12/10/16 with primers 608 + 609 with 5’BamHi and 3’ Xho ligated into pRS416gal1.
	FLAG-CidBwStr (1-1085)	GL1 (AKA-b1)	pRS416gal1	FLAG-CidBwStr (1-1085)	6.2.6	FLAG-CndB wStr (1-1085). Sequenced 5’ and 3’ ends which are perfect but not middle of the gene. Made on 2/28/17 with primers 702 and 703 with 5’ BamHI and 3’ XhoI product cloned into pRS416gal1.
	Figure 1b-c Constructs Used
	Name	#	Vector	Insert	Location JB Database	Notes
	FLAG-CidBwHa	FX3	pRS416gal1	FLAG-CidBwHa	5.7.5	(Flag) wHa CidB. Fully sequenced. There is a charge switch allele/polymorphism in all reads; I later confirmed that fixing the polymorphism to the reference sequence did not alter/change the experimental phenotype in yeast. The subsequent descendent clone created was FZ104. Made on 12/10/16 with primers 608 + 609 with 5’BamHi and 3’ Xho ligated into pRS416gal1.
	vector		pRS425	empty	2.6.1	Leu/Amp; Blank 2 micron vector from the pRS series
	FLAG-CidAwHa	FW3	pRS425gal1	FLAG-CidAwHa	5.7.4	FLAG-wHa CidA in pRS425 gal1 made with pcr of wHa bacteria with 606 and 607 oligos and cloned with 5’bamHI 3’XhoI into the vector. Made on 12/10/16 during the midnight special experiment run. Fully sequenced and is perfect.
	FLAG-CinAwNo	GA3	pRS425gal1	FLAG-CinAwNo	5.9.3	FLAG- wNo CinA (synthetic) cloned by PCR on 12/15/16 with 653 and 654 5’BamHi 3’HindIII into pRS425gal1. Sequence is perfect.
	FLAG-CinAwRi	FJ1	pRS425gal1	FLAG-CinAwRi	5.5.2	FLAG-CinA ; made on 11/3/16 by primers 587 and 588 subcloning by PCR a BamHI 5’, XhoI 3’ fragment ligated into pRS425gal1. sequence is perfect
	His6-CidAwPip	DF1	pRS425	His6-CidAwPip	2.7.6	(His6)wPa_0282; subcloned by PCR with 5’ SmaI gal1-0282-cytT– 3’NotI fragment from AA2 into pRS425 leu 2 micron vector. Perfect plasmid.. fully sequenced….. created during hell week!!! Reference for this is Beckmann et al., 2017 Nature Microbiology
	FLAG-CndAwStr	GK2 (AKA-a2)	pRS425gal1	FLAG-CndAwStr	6.2.5	FLAG-CndAwStr ; sequence is pefect; made on 2/28/17 with primers 700 and 701 5’bamHI 3’ XhoI cloned into pRS425gal1.
	Figure 2a-b Constructs Used
	Name	#	Vector	Insert	Location JB Database	Notes
	YGPM25o01		pGP564	see Table S1	2-micron tiling library	Jones, G. M. et al. A systematic library for comprehensive overexpression screens in Saccharomyces cerevisiae. Nat Methods 5, 239-241, doi:10.1038/nmeth.1181 (2008).
	YGPM26g16		pGP564	see Table S1	2-micron tiling library	Jones, G. M. et al. A systematic library for comprehensive overexpression screens in Saccharomyces cerevisiae. Nat Methods 5, 239-241, doi:10.1038/nmeth.1181 (2008).
	YGPM12h13		pGP564	see Table S1	2-micron tiling library	Jones, G. M. et al. A systematic library for comprehensive overexpression screens in Saccharomyces cerevisiae. Nat Methods 5, 239-241, doi:10.1038/nmeth.1181 (2008).
	YGPM21f02		pGP564	see Table S1	2-micron tiling library	Jones, G. M. et al. A systematic library for comprehensive overexpression screens in Saccharomyces cerevisiae. Nat Methods 5, 239-241, doi:10.1038/nmeth.1181 (2008).
	YGPM32e11		pGP564	see Table S1	2-micron tiling library	Jones, G. M. et al. A systematic library for comprehensive overexpression screens in Saccharomyces cerevisiae. Nat Methods 5, 239-241, doi:10.1038/nmeth.1181 (2008).
	YGPM32b05		pGP564	see Table S1	2-micron tiling library	Jones, G. M. et al. A systematic library for comprehensive overexpression screens in Saccharomyces cerevisiae. Nat Methods 5, 239-241, doi:10.1038/nmeth.1181 (2008).
	YGPM11h18		pGP564	see Table S1	2-micron tiling library	Jones, G. M. et al. A systematic library for comprehensive overexpression screens in Saccharomyces cerevisiae. Nat Methods 5, 239-241, doi:10.1038/nmeth.1181 (2008).
	CidBwPip-3xFLAG	EQ92	pRS416gal1	CidBwPip-3xFLAG	4.5.5	wPa_0282-3xFLAG; PCRed from EQ81 fragment of 5’ XmaI, 3’ NotI-HF ligated into pRS416 Cen/ura vector. Fragments cloned in included Gal1P - wPa_0283-3xFLAG - CycT. Reference for this is Beckmann et al., 2017 Nature Microbiology.
	Figure 2c-d Constructs Used
	Name	#	Vector	Insert	Location JB Database	Notes
	CidBwPip-3xFLAG	EQ92	pRS416gal1	CidBwPip-3xFLAG	4.5.5	wPa_0282-3xFLAG; PCRed from EQ81 fragment of 5’ XmaI, 3’ NotI-HF ligated into pRS416 Cen/ura vector. Fragments cloned in included Gal1P - wPa_0283-3xFLAG - CycT. Reference for this is Beckmann et al., 2017 Nature Microbiology.
	Vector		pGP564	empty	2.2.7	Blank vector used in: Jones, G. M. et al. A systematic library for comprehensive overexpression screens in Saccharomyces cerevisiae. Nat Methods 5, 239-241, doi:10.1038/nmeth.1181 (2008). Leu/Kan selection.
	SRP1	EN1	pGP564	SRP1 (endogenous)	3.5.3	5’ 417 bp - Srp1 - 3’ 390 bp (endogenous promoter/terminator included) cloned into pGP564 with 5’ BamHI; 3’ XhoI sites. Sequenced both 5’ and 3’ with F and R primers (but not whole gene). Sequence that was obtained was perfect.
	NSE3	EN4A1	pGP564	NSE3 (endogenous)	6.8.1	sequenced 5 and 3’ ends and it was subcloned by RE digest from a fully sequenced perfect construct (EN4A). 5’ BamHI 3’ XhoI in pGP564 (KAN). Made on 8/15/17. Rtt103 fragment removed
	[Nse3-Rtt103]	ER7	pGP564	[Nse3-Rtt103]	4.5.9	[Nse3 - Rtt103] fragments in pGP564. Encoding bases 508 - 3’ 486 bp upstream of stop. Whole fragment is sequenced and perfect. 5’ SacI, 3’ XhoI. Driven by endogenous promoter with Amp/Leu Cassette.
	RTT103	Rtt1	pGP564	RTT103 (endogenous)	6.9.6	Rtt103 yeast genetic ORF and endogenous promoter/terminator cloned into pGP564 with primers 876, 877, 5’ xhoI 3’ pstI on 10/9/17. Sequenced 5’ and 3’ ends which were perfect. 486 bp 5’; 147 bp 3’. This clone specifically does not include any sequence from neighbor ORF Nse3.
	HRP1	Hrp1	pGP564	Hrp1 (endogenous)	7.1.9	endogenous Hrp1 cloned into pGP564 bamHI and XhoI 506 bp 5’;226 bp 3’ on 10/9/17. Sequenced 5’ and 3’ ends which were perfect.
	Figure 3a-b Constructs Used
	Name	#	Vector	Insert	Location JB Database	Notes
	His6-CidBwPip	CP103	pRS416gal1	His6-CidBwPip	2.5.1	N-term His6; 0283 in CEN pRS416 gal1 ura marked plasmid. Clone made from BamHI 5’ XhoI 3’ excision of AE2 subcloned into 416gal1. Sequence is perfect; gal1 promoter; cyc terminator. Verified toxic phenotype at 34-37.reference for this is Beckmann et al., Nature Microbiology 2017
	vector		pGP564	empty	2.2.7	Blank vector used in: Jones, G. M. et al. A systematic library for comprehensive overexpression screens in Saccharomyces cerevisiae. Nat Methods 5, 239-241, doi:10.1038/nmeth.1181 (2008). Leu/Kan selection.
	SRP1	EN1	pGP564	SRP1 (endogenous)	3.5.3	5’ 417 bp - Srp1 - 3’ 390 bp (endogenous promoter/terminator included) cloned into pGP564 with 5’ BamHI; 3’ XhoI sites. Sequenced both 5’ and 3’ with F and R primers (but not whole gene). Sequence that was obtained was perfect.
	FLAG-SRP1	SRP221	pGP564	FLAG-SRP1	6.8.7	FLAG-Srp1 with endogenous promoter and terminator in pGP564. Sequence is perfect. 5’ 417 bp – FLAG-Srp1 - 3’ 390 bp (endogenous promoter/terminator included) cloned into 564 with 5’ BamHI; 3’ XhoI sites. Made on 8/30/17 with.
	FLAG-srp1S116F	SF3	pGP564	FLAG-srp1S116F	6.8.3	FLAG-Srp1 S116F with endogenous promoter and terminator in pGP564 (kan) Sequence is perfect.5’ 417 bp – FLAG-Srp1 - 3’ 390 bp (endogenous promoter/terminator included) cloned into with 5’ BamHI; 3’ XhoI sites. Made on 8/30/17.
	FLAG-srp1E145K	EK1	pGP564	FLAG-srp1E145K	6.8.4	FLAG-Srp1 E145K with endogenous promoter and terminator in pGP564 (kan) Sequence is perfect.5’ 417 bp – FLAG-Srp1 - 3’ 390 bp (endogenous promoter/terminator included) cloned into with 5’ BamHI; 3’ XhoI sites. Made on 8/30/17.
	Figure 3c Constructs Used
	Name	#	Vector	Insert	Location JB Database	Notes
	strain srp1S116F	in W303 background		chromosomal mutation	1.5.2 (yeast database)	Gift from Fink Lab at MIT. Genotype: srp1-31; ade2-1; ura3-1; his3-11,15; trp1^63; leu2-3, 112; can1-100; isogenic to w303; L4884 made srp1-31 by pop in/pop out with pNOY172 tight ts; Strain number is L5677; MATx mating type; Donor Loeb; from reference; 1995 paper: “The yeast nuclear import receptor is required for mitosis.” from Fink lab. has tight temperature sensitivity should be dead or not g…
	vector 1		pRS416gal1	empty	2.3.5	Ampr, cen, ura3, Gal1 promoter-MCS-cyc1 term. Ref: NAR(94)22:5767; MrthEnz(97)283:313
	vector 2		pGP564	empty	2.2.7	Blank vector used in: Jones, G. M. et al. A systematic library for comprehensive overexpression screens in Saccharomyces cerevisiae. Nat Methods 5, 239-241, doi:10.1038/nmeth.1181 (2008). Leu/Kan selection.
	FLAG-CidBwHa	FZ104	pRS416gal1	FLAG-CidBwHa	6.9.1	full Sequence is perfect. (Flag) wHa CidB. Made on 9/20/17 with primers 608 + 609 with 5’BamHi and 3’ Xho ligated into pRS416gal1.
	FLAG-CidB*wHa (C1007A)	FZ1D	pRS416gal1	FLAG-CidB*wHa (C1007A)	6.9.2	sequence is perfect. FLAG-wHa CidB* (C1007A) in pRS416gal1 5’ BamHI, 3’ XhoI originally made by pcr with 608 and 609 on 9/20/17. Modified by quickchange with primers 777 and 778.
	SRP1	EN1	pGP564	SRP1 (endogenous)	3.5.3	5’ 417 bp - Srp1 - 3’ 390 bp (endogenous promoter/terminator included) cloned into pGP564 with 5’ BamHI; 3’ XhoI sites. Sequenced both 5’ and 3’ with F and R primers (but not whole gene). Sequence that was obtained was perfect.
	Figure 3d Constructs Used
	Name	#	Vector	Insert	Location JB Database	Notes
	FLAG-CinBwPip	EA42	pRS416gal1	FLAG-CinBwPip	3.4.6	FLAG-wPa_0295 in CEN pRS416gal1. BamHi 5’, XhoI 3; amino acid sequence is perfect. Reference for this is Nature Microbiology Beckmann et al., 2017
	vector		pGP564	empty	2.2.7	Blank vector used in: Jones, G. M. et al. A systematic library for comprehensive overexpression screens in Saccharomyces cerevisiae. Nat Methods 5, 239-241, doi:10.1038/nmeth.1181 (2008). Leu/Kan selection.
	SRP1	EN1	pGP564	SRP1 (endogenous)	3.5.3	5’ 417 bp - Srp1 - 3’ 390 bp (endogenous promoter/terminator included) cloned into pGP564 with 5’ BamHI; 3’ XhoI sites. Sequenced both 5’ and 3’ with F and R primers (but not whole gene). Sequence that was obtained was perfect.
	Figure 4 Constructs Used
	Name	#	Vector	Insert	Location JB Database	Notes
	BL21-AI				2.3.9	BL21-AI™ E. coli contains a chromosomal insertion of the gene encoding T7 RNA polymerase (T7RNAP) into the araB locus of the araBAD operon, placing regulation of T7 RNAP under the control of the arabinose-inducible araBAD promoter (1). Therefore, this strain is especially useful for the expression of genes that may be toxic to other BL21 strains where basal expression of T7 RNAP is leaky. The BL2…
	His6-CidB*wPip (C1025A)	V1	pBadA	His6-CidB*wPip (C1025A)	1.2.6	N-terminal His tag; *Catalytic C-A mutant, Full length wpip0283 wildtype, made from Q5 high fidelity polymerase; 5' XhoI, 3' BstbI fragment; Made in Beckmann et al., 2017 Nature Microbiology.
	FLAG-CidAwPip	X22	pBadA	FLAG-CidAwPip	1.7.2	N-term FLAG tag; True Wildtype; made to start directly at true start codon with respect to promoter sequence. 5’ NcoI – 3’ EcoRI fragment cloned into pbadA; sequence is perfect; Cuts off all the extra shit that pBadA tacks on. Nucleic Acid sequence has one conserved mutation; Amino Acid sequence is fully conserved. Actually this sequence has the better codon. Made in Beckmann et al., 2017 Nature …
	His6-CidAwPip	AS1	pBadB	His6-CidAwPip	1.5.3	AS1 – ***Codon Optimized N14 = (his6)0282; sequence is perfect. pBadB vector; 5' XhoI, 3' EcoRI fragment; Made in Beckmann et al., 2017 Nature Microbiology.
	Figure 5 Constructs Used
	Name	#	Vector	Insert	Location JB Database	Notes
	GFP	EC2	pUASp-attb	EGFP:C1	3.1.6	sequence is perfect. Enhanced GFPC1 in pUASp-attb. 5’ notI, 3’ BamHI; 2.18.15. quickchanged out a BamHI site according to primers? Made in Beckmann et al., 2017 Nature Microbiology.
	CidA-T2A-CidBwMel	FS13	pUASp-attb	CidA-T2A-CidBwMel	5.7.2	wMel t2a cidA-B operon. Synthesized from genscript and Subcloned from the synthesized construct 5’ NotI, 3’ bamHI into puasp-attb vector. Verified by C-terminal sequencing and Restriction Digest Migration analysis on 1/9/2017.
	SRP1	HB1	pUASp-attb	SRP1	7.3.3	Srp1 cloned into pUASp-attb. Sequence is perfect. Made on 3.27.18 with primers 947 and 948 with 5’ notI and 3’ bamHI.
	D.m.KapA1	FQ8	pUASp-attb	Karyopherin Alpha 1 D.mel (Srp1 ortholog)	5.5.9	Sequence is perfect. synthesized from genscript. 5' NotI, 3' BamHI. Subcloned into pUASp-attb.
	Figure S1a Constructs Used
	Name	#	Vector	Insert	Location JB Database	Notes
	vector		pRS416gal1	empty	2.3.5	Ampr, cen, ura3, Gal1 promoter-MCS-cyc1 term. Ref: NAR(94)22:5767; MrthEnz(97)283:313
	FLAG-CidBwPip	F108	pRS416gal1	FLAG-CidBwPip	6.4.3	N-term FLAG; 0283 in CEN pRS416 gal1 ura marked plasmid. Clone made SLIM of cp103 with primers 720, 721, 722, 723. Sequence is perfect; gal1 promoter; cyc terminator.
	FLAG-CidBwHa	FX3	pRS416gal1	FLAG-CidBwHa	5.7.5	(Flag) wHa CidB. Fully sequenced. There is a charge switch allele/polymorphism in all reads; I later confirmed that fixing the polymorphism to the reference sequence did not alter/change the experimental phenotype in yeast. The subsequent descendent clone created was FZ104. Made on 12/10/16 with primers 608 + 609 with 5’BamHi and 3’ Xho ligated into pRS416gal1.
	FLAG-CidBwStr (1-1085)	GL1 (AKA-b1)	pRS416gal1	FLAG-CidBwStr (1-1085)	6.2.6	FLAG-CndB wStr (1-1085). Sequenced 5’ and 3’ ends which are perfect but not middle of the gene. Made on 2/28/17 with primers 702 and 703 with 5’ BamHI and 3’ XhoI product cloned into pRS416gal1.
	Figure S1b Constructs Used
	Name	#	Vector	Insert	Location JB Database	Notes
	vector		pRS425	empty	2.6.1	Leu/Amp; Blank 2 micron vector from the pRS series
	FLAG-CidAwHa	FW3	pRS425gal1	FLAG-CidAwHa	5.7.4	FLAG-wHa CidA in pRS425 gal1 made with pcr of wHa bacteria with 606 and 607 oligos and cloned with 5’bamHI 3’XhoI into the vector. Made on 12/10/16 during the midnight special experiment run. Fully sequenced and is perfect.
	FLAG-CinAwNo	GA3	pRS425gal1	FLAG-CinAwNo	5.9.3	FLAG- wNo CinA (synthetic) cloned by PCR on 12/15/16 with 653 and 654 5’BamHi 3’HindIII into pRS425gal1. Sequence is perfect.
	FLAG-CinAwRi	FJ1	pRS425gal1	FLAG-CinAwRi	5.5.2	FLAG-CinA ; made on 11/3/16 by primers 587 and 588 subcloning by PCR a BamHI 5’, XhoI 3’ fragment ligated into pRS425gal1. sequence is perfect
	His6-CidAwPip	DF1	pRS425	His6-CidAwPip	2.7.6	(His6)wPa_0282; subcloned by PCR with 5’ SmaI gal1-0282-cytT– 3’NotI fragment from AA2 into pRS425 leu 2 micron vector. Perfect plasmid.. fully sequenced….. created during hell week!!!
	FLAG-CndAwStr	GK2 (AKA-a2)	pRS425gal1	FLAG-CndAwStr	6.2.5	FLAG-CndAwStr ; sequence is pefect; made on 2/28/17 with primers 700 and 701 5’bamHI 3’ XhoI cloned into pRS425gal1.
	Figure S1c Constructs Used
	Name	#	Vector	Insert	Location JB Database	Notes
	vector		pRS416gal1	empty	2.3.5	Ampr, cen, ura3, Gal1 promoter-MCS-cyc1 term. Ref: NAR(94)22:5767; MrthEnz(97)283:313
	CidBwPip wildtype	N102	pRS416gal1	CidBwPip wildtype	6.5.8	No tag at all. Wildtype; 0283 in CEN pRS416 gal1 ura marked plasmid. Clone made SLIM of cp103 on 5/12/17 with primers 769,770,771,772. Sequence is perfect; gal1 promoter; cyc terminator.
	His6-CidBwPip	CP103	pRS416gal1	His6-CidBwPip	2.5.1	N-term His6; 0283 in CEN pRS416 gal1 ura marked plasmid. Clone made from BamHI 5’ XhoI 3’ excision of AE2 subcloned into 416gal1. Sequence is perfect; gal1 promoter; cyc terminator. Verified toxic phenotype at 34-37.
	FLAG-CidBwPip	F108	pRS416gal1	FLAG-CidBwPip	6.4.3	N-term FLAG; 0283 in CEN pRS416 gal1 ura marked plasmid. Clone made SLIM of cp103 with primers 720, 721, 722, 723. Sequence is perfect; gal1 promoter; cyc terminator.
	CidBwPip-3xFLAG	EQ92	pRS416gal1	CidBwPip-3xFLAG	4.5.5	wPa_0282-3xFLAG; PCRed from EQ81 fragment of 5’ XmaI, 3’ NotI-HF ligated into pRS416 Cen/ura vector. Fragments cloned in included Gal1P - wPa_0283-3xFLAG - CycT.
	HA-CidBwPip	H101	pRS416gal1	HA-CidBwPip	6.5.7	N-term HA-tag; 0283 in CEN pRS416 gal1 ura marked plasmid. Clone made SLIM of cp103 on 5/12/17 with primers 761, 762, 763, 764. Sequence is perfect (But I had to look at chromatogram in one base to be sure); gal1 promoter; cyc terminator.
	Figure S2a Constructs Used
	Name	#	Vector	Insert	Location JB Database	Notes
	His6-CidBwPip	CP103	pRS416gal1	His6-CidBwPip	2.5.1	N-term His6; 0283 in CEN pRS416 gal1 ura marked plasmid. Clone made from BamHI 5’ XhoI 3’ excision of AE2 subcloned into 416gal1. Sequence is perfect; gal1 promoter; cyc terminator. Verified toxic phenotype at 34-37.reference for this is Beckmann et al., Nature Microbiology 2017
	YGPM14b23		pGP564	see Table S1	2-micron tiling library	Jones, G. M. et al. A systematic library for comprehensive overexpression screens in Saccharomyces cerevisiae. Nat Methods 5, 239-241, doi:10.1038/nmeth.1181 (2008).
	YGPM15l20		pGP564	see Table S1	2-micron tiling library	Jones, G. M. et al. A systematic library for comprehensive overexpression screens in Saccharomyces cerevisiae. Nat Methods 5, 239-241, doi:10.1038/nmeth.1181 (2008).
	YGPM3e23		pGP564	see Table S1	2-micron tiling library	Jones, G. M. et al. A systematic library for comprehensive overexpression screens in Saccharomyces cerevisiae. Nat Methods 5, 239-241, doi:10.1038/nmeth.1181 (2008).
